# Supplementary material
Source: PubMed Central journal article supplement (PMC9999273)

## Supplementary Online Content

Fakih M, Sandhu J, Lim D, Li X, Li S, Wang C. Regorafenib, ipilimumab, and nivolumab for patients with microsatellite stable colorectal cancer and disease progression with prior chemotherapy: a phase 1 nonrandomized clinical trial. *JAMA Oncol*. Published online March 9, 2023. doi:10.1001/jamaoncol.2022.7845

**eTable 1.** Nonimmune-Related Adverse Events

**eTable 2.** Detailed Characteristics of Patients

**eFigure.** Waterfall Plot of Tumor Responses and Molecular Characteristics

This supplementary material has been provided by the authors to give readers additional information about their work.

**eTable 1.** Nonimmune-Related Adverse Events

| Non-irAEs                                        | RP2D cohort (n=29) |                  |                  | Dose optimization cohort (n=10) |                  |                  |
|--------------------------------------------------|--------------------|------------------|------------------|---------------------------------|------------------|------------------|
|                                                  | Grade 2<br>n (%)   | Grade 3<br>n (%) | Grade 4<br>n (%) | Grade 2<br>n (%)                | Grade 3<br>n (%) | Grade 4<br>n (%) |
| Anemia                                           | 2 (6.9)            | 4 (13.8)         | 0 (0)            | 0 (0)                           | 0 (0)            | 0 (0)            |
| Thrombocytopenia                                 | 6 (20.7)           | 1 (3.4)          | 0 (0)            | 0 (0)                           | 0 (0)            | 0 (0)            |
| Palmar-plantar<br>erythrodysesthesia<br>syndrome | 2 (6.9)            | 1 (3.4)          | 0 (0)            | 1 (10)                          | 0 (0)            | 0 (0)            |
| Fatigue                                          | 6 (20.7)           | 1 (3.4)          | 0 (0)            | 0 (0)                           | 0 (0)            | 0 (0)            |
| Neutropenia                                      | 1 (3.4)            | 1 (3.4)          | 0 (0)            | 0 (0)                           | 0 (0)            | 0 (0)            |
| Abdominal<br>cramping                            | 0 (0)              | 1 (3.4)          | 0 (0)            | 0 (0)                           | 0 (0)            | 0 (0)            |
| Proteinuria                                      | 4 (13.8)           | 0 (0)            | 0 (0)            | 1 (10)                          | 0 (0)            | 0 (0)            |
| Hypertension                                     | 1 (3.4)            | 0 (0)            | 0 (0)            | 0 (0)                           | 0 (0)            | 0 (0)            |
| Nausea                                           | 1 (3.4)            | 0 (0)            | 0 (0)            | 0 (0)                           | 0 (0)            | 0 (0)            |
| Leukopenia                                       | 4 (13.8)           | 0 (0)            | 0 (0)            | 0 (0)                           | 0 (0)            | 0 (0)            |
| Anorexia                                         | 1 (3.4)            | 0 (0)            | 0 (0)            | 0 (0)                           | 0 (0)            | 0 (0)            |
| Hypocalcemia                                     | 1 (3.4)            | 0 (0)            | 0 (0)            | 0 (0)                           | 0 (0)            | 0 (0)            |
| Hyponatremia                                     | 1 (3.4)            | 0 (0)            | 0 (0)            | 0 (0)                           | 0 (0)            | 1 (10)           |

**eTable 2.** Detailed Characteristics of Patients

| Patient | Primary tumor location | Metastatic pattern                                                             | RAS         | BRAF <sup>V600E</sup> | PD-L1 Score | TMB (mut/Mb) | Response (RECIST) | Response (iRECIST) |
|---------|------------------------|--------------------------------------------------------------------------------|-------------|-----------------------|-------------|--------------|-------------------|--------------------|
| 001     | Left                   | Lung, LNs, soft tissue                                                         | NRAS (G12D) | WT                    | 1           | 3            | SD                | SD                 |
| 002     | Left                   | Liver, lung, LNs                                                               | KRAS (G12D) | WT                    | 1           | 4            | PD                | PD                 |
| 003     | Left                   | Peritoneal carcinomatosis                                                      | WT          | WT                    | 0           | 11           | PD                | PD                 |
| 004     | Left                   | Lung                                                                           | KRAS (G12D) | WT                    | NA          | NA           | SD                | SD                 |
| 005     | Right                  | Lung, liver, LNs                                                               | KRAS (G12D) | WT                    | 0           | 9.6          | PD                | PD                 |
| 006     | Left                   | Liver, Lung, adrenal, peritoneal nodules                                       | NRAS (G12D) | WT                    | NA          | NA           | PD                | PD                 |
| 007     | Left                   | Lung, liver serosal, LNs                                                       | WT          | WT                    | NA          | 2            | PD                | PD                 |
| 008     | Left                   | Lung, LNs                                                                      | KRAS (G12V) | WT                    | NA          | 9            | PR                | PR                 |
| 009     | Right                  | Lung                                                                           | KRAS (G12V) | WT                    | NA          | NA           | PD                | SD                 |
| 010     | Left                   | Lung                                                                           | KRAS (G12D) | WT                    | NA          | 4            | PR                | PR                 |
| 011     | Right                  | Lung                                                                           | WT          | V600E                 | NA          | NA           | PR                | PR                 |
| 012     | Right                  | Lung, LNs                                                                      | WT          | V600E                 | NA          | 2            | PR                | PR                 |
| 013     | Left                   | Vaginal                                                                        | KRAS (G12D) | WT                    | NA          | NA           | SD                | SD                 |
| 014     | Left                   | Skin, LNs                                                                      | KRAS (G12V) | WT                    | NA          | 1            | PD                | PD                 |
| 015     | Left                   | Lung, Liver, LNs                                                               | KRAS (G13D) | WT                    | 10          | 2            | SD                | SD                 |
| 016     | Left                   | LNs                                                                            | KRAS (G12V) | WT                    | NA          | 1            | PR                | PR                 |
| 017     | Left                   | Pelvic                                                                         | WT          | WT                    | 0           | NA           | SD                | SD                 |
| 018     | Left                   | Lung, Liver                                                                    | WT          | WT                    | NA          | NA           | SD                | SD                 |
| 019     | Left                   | Lung, Pelvic, LNs                                                              | WT          | V600E                 | NA          | 3            | PD                | PR                 |
| 020     | Left                   | LNs, pelvic                                                                    | KRAS (Q61R) | WT                    | 0           | 1            | PR                | PR                 |
| 021     | Left                   | Liver, peritoneal carcinomatosis, cardiophrenic carcinomatosis, abdominal wall | KRAS (G12D) | WT                    | NA          | 1            | PD                | PD                 |
| 022     | Right                  | Lung, abdominal wall, peritoneal nodules                                       | KRAS (G13D) | WT                    | NA          | 1            | PD                | SD                 |
| 023     | Right                  | Lung                                                                           | KRAS (G12D) | WT                    | 0           | 4            | SD                | SD                 |
| 024     | Right                  | Lung, LNs                                                                      | KRAS (G13D) | WT                    | NA          | NA           | PR                | PR                 |
| 025     | Left                   | Lung, LNs                                                                      | KRAS (G12V) | WT                    | 5           | 5            | SD                | SD                 |
| 026     | Right                  | Lung                                                                           | KRAS (G12V) | WT                    | 0           | 6            | SD                | SD                 |
| 027     | Left                   | Lung, Liver, Pelvic, bone                                                      | WT          | WT                    | 0           | NA           | SD                | SD                 |
| 028     | Right                  | Lung                                                                           | KRAS (G12D) | WT                    | NA          | 2            | PR                | PR                 |
| 029     | Left                   | Lung, LNs                                                                      | WT          | WT                    | NA          | 5            | PD                | PD                 |

WT: wild type; PR: partial response; SD: stable disease; PD: progressive disease; LN: lymph node

**eFigure.** Waterfall Plot of Tumor Responses and Molecular Characteristics

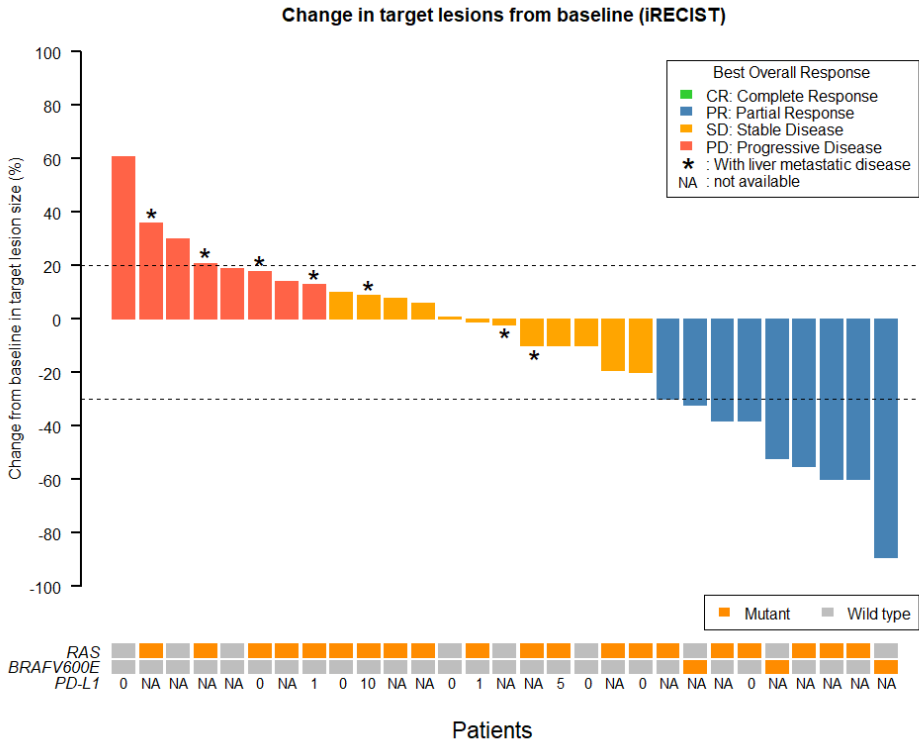

Supplement: jamaoncol-e227845-s002.pdf [file jamaoncol-e227845-s002.pdf]
