# Supplementary material
Source: PubMed Central journal article supplement (PMC9999273)
Supplement: jamaoncol-e227845-s001.pdf [file jamaoncol-e227845-s001.pdf]

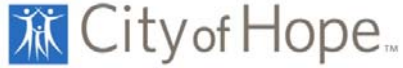

City of Hope National Medical Center  
1500 E. Duarte Road  
Duarte, CA 91010

**Clinical Trial Protocol (CA209-7LA)**

**A Phase I trial of Regorafenib, Ipilimumab, and Nivolumab (RIN) in Patients with  
Microsatellite Stable (MSS) Metastatic Colorectal Cancer Who Progressed on  
Prior Chemotherapy**

**Version Date:** April 24, 2020  
**Protocol Version:** 01  
**City of Hope#:** IRB 19417  
**Agents:** Regorafenib, Ipilimumab, and Nivolumab  
**IND Number:** Pending  
**Sponsor/ IND Holder:** City of Hope  
**Funding Support:** Pending  
**Industry Partners:** Bristol-Myers Squibb  
**Industry Partner Protocol ID:** 149354  
**NCT Number:** Pending  
**Participating Sites:** City of Hope (Duarte)

**Principal Investigator**

Marwan Fakih, MD  
City of Hope National Medical Center  
Dept. of Medical Oncology  
T: 626-256-4673 Ext. 83087  
Email: mfakih@coh.org

**Coordinating Center**

Data Coordinating Center  
City of Hope National Medical Center  
T: (626)-256-4673 x 83968  
Email: [DCC@coh.org](mailto:DCC@coh.org)

24

25 **PROTOCOL TEAM**

---

**Biostatistician**

Sierra Min Talley, Ph.D.  
Associate Research Professor  
Division of Biostatistics  
Department of Information Sciences  
Tel: (626) 256-4673 ext. 87672  
Email: MLi@coh.org

26

27 **TABLE OF CONTENTS**

---

28 Protocol Team.....2

29 Table of Contents.....3

30 List of Tables and Figures .....5

31 Abbreviations .....6

32 1.0 Protocol summary .....7

33 1.1 Synopsis.....7

34 1.2 Study Calendar .....8

35 1.3 Schema .....8

36 2.0 Objectives .....10

37 2.1 Primary Objectives.....10

38 2.2 Secondary Objectives .....10

39 2.3 Exploratory Objectives.....10

40 3.0 Background .....11

41 3.1 Standard Treatment of Metastatic Colorectal Cancer .....11

42 3.2 Third- or Later-line Therapy for Metastatic Colorectal Cancer .....11

43 3.3 Immunotherapy for Colorectal Cancer .....11

44 3.4 Immunomodulatory effects of Regorafenib .....12

45 3.5 Rational for regimen development .....12

46 3.6 Overview of Study Design .....13

47 3.7 Justification for Dose .....13

48 4.0 Study Population .....14

49 4.1 Inclusion Criteria .....14

50 4.2 Exclusion Criteria .....15

51 5.0 Participant Enrollment .....17

52 5.1 Pre-Enrollment Informed Consent and Screening Procedures .....17

53 5.2 Participant Enrollment.....17

54 5.3 Slot verification and reservation .....17

55 5.4 Registration Process .....17

56 5.5 Screen Failures and Registered Participants Who Do Not begin Study Treatment .....17

57 5.6 Dose Level Assignment .....18

58 6.0 Treatment Program.....19

59 6.1 Treatment Program Overview .....19

60 6.2 Cycle Definition .....19

61 6.3 Dose Escalation/de-escalation Treatment Plan.....19

62 6.4 Dose Escalation/de-escalation Schema .....20

63 6.5 Expansion Cohort Treatment Plan .....20

64 6.6 Duration of Therapy and Criteria for Removal from Protocol Therapy.....20

65 6.7 Follow-Up .....21

66 6.8 Re-Initiation of Treatment If Previously Achieved CR (Re-Treatment Phase) .....21

67 6.9 Duration of Study Participation .....21

68 6.10 Criteria to Initiate Re-Treatment with combination therapy .....22

69 7.0 Study Intervention .....23

70 7.1 Agent Administration.....23

71 7.2 Preparation/Handling/Storage/Accountability .....23

72 7.3 Measures to Minimize Bias: Randomization and Blinding .....24

73 7.4 Study Intervention Compliance.....24

74 7.5 Concomitant Therapy .....24

75 7.6 Dose Modification and Toxicity Management.....26

76 7.7 Intervention after the End of the Study .....34

77 8.0 Agent Information.....35

78 8.1 Nivolumab .....35

79 8.2 Ipilimumab .....37

80 8.3 Regorafenib .....39

81 9.0 Correlative/ Special Studies.....42

82 9.1 Correlative Research.....42

|     |       |                                                                                        |    |
|-----|-------|----------------------------------------------------------------------------------------|----|
| 83  | 9.2   | Correlative Tumor Study.....                                                           | 42 |
| 84  | 9.3   | Correlative Blood Study .....                                                          | 43 |
| 85  | 10.0  | Study Calendar .....                                                                   | 45 |
| 86  | 11.0  | Endpoint Definitions/Measurement of Effect.....                                        | 47 |
| 87  | 11.1  | Primary Endpoints .....                                                                | 47 |
| 88  | 11.2  | Secondary Endpoints .....                                                              | 48 |
| 89  | 11.3  | Exploratory Endpoints .....                                                            | 48 |
| 90  | 12.0  | Statistical Considerations .....                                                       | 50 |
| 91  | 12.4  | Study Design.....                                                                      | 50 |
| 92  | 12.2  | Evaluable Participants and Participant Replacement .....                               | 50 |
| 93  | 12.3  | Sample Size, Accrual Rate and Study Duration.....                                      | 50 |
| 94  | 12.4  | Stopping Rules – Treatment-Related Death.....                                          | 51 |
| 95  | 12.5  | Statistical Analysis Plan.....                                                         | 51 |
| 96  | 13.0  | Data Handling, Data Management, Record Keeping.....                                    | 52 |
| 97  | 13.4  | Source Documents.....                                                                  | 52 |
| 98  | 13.5  | Data Capture Methods and Management .....                                              | 52 |
| 99  | 13.6  | Case Report Forms/Data Submission Schedule.....                                        | 52 |
| 100 | 13.7  | Regulatory Records.....                                                                | 52 |
| 101 | 14.0  | Data & Safety Monitoring Plan, Adverse Event and Unanticipated Problem Reporting ..... | 53 |
| 102 | 14.1  | Definitions .....                                                                      | 53 |
| 103 | 14.2  | Assessment of Adverse Events.....                                                      | 54 |
| 104 | 14.3  | Reporting of Adverse Events.....                                                       | 56 |
| 105 | 15.0  | Protocol Deviations & SINGLE SUBJECT EXCEPTIONS .....                                  | 60 |
| 106 | 15.4  | Definitions .....                                                                      | 60 |
| 107 | 15.5  | Reporting of Deviations and Single Subject Exceptions.....                             | 60 |
| 108 | 16.0  | Study Oversight, Quality Assurance, & Data and Safety Monitoring.....                  | 61 |
| 109 | 16.1  | All Investigator Responsibilities .....                                                | 61 |
| 110 | 16.2  | Study Principal Investigator Responsibilities .....                                    | 61 |
| 111 | 16.3  | Protocol Management Team (PMT).....                                                    | 61 |
| 112 | 16.4  | Monitoring.....                                                                        | 62 |
| 113 | 16.5  | City of Hope Data and Safety Monitoring Committee .....                                | 62 |
| 114 | 17.0  | Ethical and Regulatory Considerations .....                                            | 63 |
| 115 | 17.1  | Ethical Standard.....                                                                  | 63 |
| 116 | 17.2  | Regulatory Compliance .....                                                            | 63 |
| 117 | 17.3  | Institutional Review Board.....                                                        | 63 |
| 118 | 17.4  | Informed Consent.....                                                                  | 63 |
| 119 | 17.5  | Participant Withdrawal.....                                                            | 64 |
| 120 | 17.6  | Special and Vulnerable Populations.....                                                | 64 |
| 121 | 17.7  | Participant Confidentiality .....                                                      | 65 |
| 122 | 17.8  | Use of Unused (Leftover) Specimens Collected for this Trial.....                       | 65 |
| 123 | 17.9  | Conflict of Interest.....                                                              | 65 |
| 124 | 17.10 | Financial Obligations, Compensation, and Reimbursement of Participants .....           | 66 |
| 125 | 17.11 | Publication/ Data Sharing .....                                                        | 66 |
| 126 | 18.0  | References .....                                                                       | 67 |
| 127 | 19.0  | Appendix A: ECOG Performance Status.....                                               | 69 |
| 128 | 20.0  | Appendix B: Contraception Guidelines .....                                             | 70 |
| 129 | 21.0  | Appendix C: RECIST V 1.1 Response Criteria.....                                        | 71 |
| 130 | 22.0  | Appendix D: Immune Related Response Criteria .....                                     | 76 |
| 131 | 23.0  | Appendix E-1: Regorafenib Patient Drug Diary Instructions .....                        | 80 |
| 132 |       | Appendix E-2: Regorafenib Patient Drug Diary .....                                     | 81 |
| 133 | 24.0  | Appendix F: CYP3A4 Inhibitors and Inducers.....                                        | 84 |
| 134 | 25.0  | Appendix G: New York Heart Association Classification of Heart Failure .....           | 85 |
| 135 | 26.0  | APPENDIX h: Management algorithms .....                                                | 86 |

136  
137

138

139

140

**LIST OF TABLES AND FIGURES**

---

141 Figure 1–1: Study Schema.....9

142 Table 6.3 Dosing Regimen and Schedule.....19

143 Table 6.10 Criteria to Initiate Re-treatment with Combination Therapy .....22

144 Table 7-1: Regorafenib Dose Modification/Dose Interruption Guide: .....27

145 (except HFSR, Hypertension, and Liver Function Test Abnormalities) .....27

146 Table 7-2: Regorafenib Dose Modification Guidance: HFSR/ Palmar-Plantar Erythrodysesthesia Syndrome 27

147 Table 7-3: Regorafenib Dose Modification Guidance, Non-Immune Toxicities: Hypertension.....28

148 Table 7-4: Regorafenib Dose Modifications for Liver Function Test Abnormalities<sup>a</sup> .....29

149 Table 7-5: Recommended Dose Modifications for nivolumab.....30

150 Table 7-5: Recommended Dose Modifications for nivolumab.....31

151 Table 7-6: Recommended Dose Modifications for Ipilimumab .....32

152 Table 9.2 Tumor Tissue Studies Overview.....42

153 Table 9.3 Peripheral blood studies overview .....43

154 Table 10.0 Study Activity Calendar.....45

155 Table 22-1: Comparison WHO and irRECIST criteria.....76

156 Table 22-2. Derivation of irRECIST overall responses .....78

157

158

| <b>Abbreviation</b> | <b>Meaning</b>                                   |
|---------------------|--------------------------------------------------|
| AE                  | Adverse Event                                    |
| CEA                 | Carcinoembryonic Antigen                         |
| CFR                 | Code of Federal Regulations                      |
| COH                 | City of Hope                                     |
| CR                  | Complete Response                                |
| CRA                 | Clinical Research Coordinator                    |
| CRF                 | Case Report Form                                 |
| CSFR1               | Colony Stimulating Factor 1 Receptor             |
| CTLA-4              | cytotoxic T-lymphocyte-associated protein 4      |
| CTCAE               | Common Terminology Criteria for Adverse Events   |
| DCC                 | Data Coordinating Center                         |
| DLT                 | Dose Limiting Toxicity                           |
| DSMC                | Data & Safety Monitoring Committee               |
| EHR                 | Electronic Health Record                         |
| EOT                 | End of Treatment                                 |
| FDA                 | Food and Drug Administration                     |
| GCP                 | Good Clinical Practice                           |
| HIV                 | Human Immunodeficiency Virus                     |
| HFSR                | Hand-foot skin reaction                          |
| IB                  | Investigator's Brochure                          |
| IDS                 | Investigational Drug Services                    |
| IND                 | Investigational New Drug                         |
| irAE                | Immune Related Adverse Event                     |
| IRB                 | Institutional Review Board                       |
| MDSC                | Myeloid Derived Suppressor Cells                 |
| MSI-H               | Microsatellite Instability High                  |
| MSS                 | Microsatellite Stable                            |
| NCI                 | National Cancer Institute                        |
| OIDRA               | Office of IND Development and Regulatory Affairs |
| OS                  | Overall Survival                                 |
| ORR                 | Objective Response Rate                          |
| PD                  | Progressive Disease                              |
| PD-1                | Programmed Cell Death Protein 1                  |
| PD-L1               | Programmed Death Ligand 1                        |
| PFS                 | Progression Free Survival                        |
| PI                  | Principal Investigator                           |
| PMT                 | Protocol Management Team                         |
| PR                  | Partial Response                                 |
| RECIST              | Response Evaluation Criteria In Solid Tumors     |
| RVO                 | Retinal Vein Occlusion                           |
| SAE                 | Serious Adverse Event                            |
| SD                  | Stable disease                                   |
| Treg                | Regulatory T cell                                |
| TILs                | Tumor Infiltrating Lymphocytes                   |

## 160 1.0 PROTOCOL SUMMARY

---

### 161 1.1 Synopsis

162 **Protocol Title:** A Phase I trial of Regorafenib, Ipilimumab, and Nivolumab (RIN) in Patients with  
163 Microsatellite stable (MSS) Metastatic Colorectal Cancer (CRC) Who Progressed on Prior Chemotherapy

164 **Short Title:** Regorafenib, Ipilimumab and Nivolumab in Refractory MSS CRC

#### 165 **Rationale:**

166 Anti-programmed cell death protein-1 (anti-PD-1) antibodies, nivolumab or pembrolizumab as  
167 monotherapy are not effective in pMMR/MSS CRC. The combination of durvalumab plus tremelimumab  
168 in MSS colorectal cancer with progression on standard chemotherapy has been associated with an  
169 improvement in the median OS from 4.1 months (best supportive care) to 6.6 months. These  
170 improvements were not deemed of significant clinical magnitude to support the routine implementation  
171 of this regimen in metastatic colorectal cancer. However, it does support PD-1/CTLA-4 targeting as a  
172 regimen to build on in MSS colorectal cancer. Similarly, the combination therapy of Ipilimumab and  
173 Nivolumab achieved very little in improving overall survival and very few patients (<5%) responded to  
174 this combination. Regorafenib is approved for the treatment of metastatic colorectal cancer (mCRC)  
175 patients in 3rd or later line of therapy based on overall survival benefit. In a Phase Ib trial of Japanese  
176 patients with advanced pMMR/MSS CRC, the combination of regorafenib and nivolumab was safe and  
177 demonstrated significant activity with a confirmed objective response rate (ORR) of 33%.

178 The purpose of this study is to investigate the combination of regorafenib, ipilimumab and nivolumab  
179 (RIN) in MSS metastatic colorectal patients who progressed on standard systemic therapy in order to  
180 determine the safety and feasibility of this regimen and describe its clinical activity in an expanded safety  
181 cohort. We hypothesize that the combination of regorafenib, ipilimumab and nivolumab may result in  
182 improved efficacy and the ORR would be around 33% or higher, estimated from the Japanese study using  
183 the combination of Regorafenib and Nivolumab.

184 **Objectives:** objectives are listed in [section 2.0](#)

185 **Number of Centers:** Single Center Study

186 **Number of Subjects:** 26~32 evaluable patients will be enrolled on this study

187 **Study Population:** Patients participating on this study should have a diagnosis of MSS metastatic  
188 colorectal cancer and should have progressed on standard chemotherapy

#### 189 **Study Design:**

190 Nivolumab and ipilimumab will be given at fixed doses of 240mg IV Q 2 weeks and 1mg/kg IV every 6  
191 weeks, respectively. Regorafenib will start at 80mg orally once daily x 21 days every 28 days. A cycle will  
192 be defined as 28-day cycle. A cohort of 3 patients will be enrolled at the first dose level of regorafenib of  
193 80mg, if 1 or less patients experience a Dose Limiting Toxicity (DLT), an addition 3 patients will be  
194 enrolled on cohort. When there is at most 1 patient have a DLT out of 6 patients, this dose will be  
195 considered the recommended expansion dose. If 2 or more patients have a DLT when treated with first  
196 dose level, an alternative dose of regorafenib of 40 mg x 21 days every 28 days will be investigated for  
197 safety with the same 3 + 3 design. If the lower dose is deemed non-tolerable the study will be suspended.

198 RP2D will be selected to enroll additional 20 patients for dose-expansion. PI may choose a lower dose  
199 safer than the dose level with 1/6 toxicity in the dose-selection stage. If DLT satisfying toxicities are noted  
200 in > 33% of patients at the RP2D level (with a minimum of 9 treated patients), then the study will  
201 evaluate a dose level -1 as the expansion dose (if RP2D is Dose Level 1) or will consider termination/  
202 change treatment schedule and dose (if RP2D is Dose Level -1). A minimum of 10 patients should be  
203 treated in the expansion phase of the reduced dose.

204 Upon the completion of the enrollment of the intended cohort, we have noted significant clinical  
205 benefits that support the investigation of this regimen. In the first 13 patients enrolled on this study, only  
206 3 patients had progressive disease on the first imaging study (2 months), one of whom has subsequent

207 disease regression at the 4-month mark (initial pseudoprogression). Therefore, the disease control rate in  
208 the treatment evaluable patients has been 11/13 patients. These results are highly promising in a  
209 refractory patient population where the disease control rate with other alternative therapies (trifluridine  
210 or regorafenib) are only 40% at 2 months. Seven patients had a radiographic assessment at 4 months so  
211 far, only 1 of whom had progressive. All 6/7 patients that were evaluable at the 4-month mark has  
212 disease regression, two of whom satisfied PR definition. In contrast, available FDA approved agents for  
213 our patient population (trifluridine or regorafenib monotherapy) have a response rate of 1%. Based on  
214 these initial exciting data, we are confident that our regimen will be explored further in patients with  
215 refractory colorectal cancer.

216 As we prepare to investigate this regimen in larger studies, it will be important to further refine toxicity  
217 management, especially as to what applies to regorafenib and immunotherapy related toxicity.  
218 Particularly, a transient grade 3 rash has been noted in our study and other combinations of regorafenib  
219 and nivolumab studies. This rash was non-DLT defining, occurred in the first cycle of treatment,  
220 responded promptly with complete resolution within 1 week to a short course of steroids, and did not  
221 recur with resumption of study treatment after rash resolution. We hypothesize that this rash is related  
222 to an initial “flare” associated with study treatment and should not lead to permanent dose reductions or  
223 modification is subsequent study dose treatment. While the current starting dose and regimen is feasible  
224 and appears on preliminary analysis to be associated with significant activity, it will be important to  
225 explore variant schedules that can reduce its incidence. Particularly, it will be important to assess if a  
226 lower dose of regorafenib of 40 mg daily on cycle 1, followed by escalation to 80 mg daily can result in  
227 better tolerance as far as skin related side effects. We are therefore proposing an additional 10 patient  
228 cohort to investigate this variant dosing.

#### 229 **Data and Statistical Plan:**

230 A 3+3 design will be used to evaluate the safety of regorafenib given at 80mg (orally once daily x 21 days  
231 every 28 days or 40 mg once daily x 21 days every 28 days if the 80 mg dose level is not tolerated) when  
232 combined with nivolumab and ipilimumab at the fixed doses. Additional 20 patients will be enrolled for  
233 the dose-expansion part of the study at the selected RP2D. The dose-expansion study aims to estimate  
234 the ORR for the 3-drug combination and we anticipate the combination therapy will achieve ORR similar  
235 or higher than regorafenib combined with nivolumab at 33%. Exact binomial 95% confidence interval will  
236 be provided for the estimated ORR with Person-Klopper method. In addition, we will test the hypothesis  
237  $ORR \geq 33\%$  against historical data for nivolumab and ipilimumab alone with  $ORR < 5\%$ . With 26 patients  
238 treated at RP2D, a single arm Binomial test is able to reject the null hypothesis with type I error 0.05 and  
239 99% power. For a more conservative estimate of the ORR at 21%, the test still has 82% power. The null  
240 hypothesis of 5% will be rejected when at least 4 out of 26 patients respond with  $ORR \geq 15.4\%$ . When 5  
241 out of 26 patients respond, the ORR is estimated 19.3% and the 95% C.I. by Person-Kleopper method  
242 rules out the true ORR less than 6.6%. When further reduction is made from the RP2D at dose level -1,  
243 with the minimum 10 patients, we will have 79% power to test the ORR at 33% against the null of  $< 5\%$   
244 and the null will be rejected when  $\geq 3$  patients respond.

245 An additional 10-patient cohort will be enrolled on study with a starting dose of regorafenib of 40  
246 mg/day on cycle 1, to be escalated to 80 mg per day on cycle 2 if no dose limiting toxicities are noted on  
247 cycle 1. Transient G3 skin toxicity (non-DLT) has occurred so far in approximately ~40% (9/23) of patients  
248 and has been transient without recurrence. The expanded cohort will explore if this variant dosing results  
249 in better tolerance and eliminates the occurrence of this transient skin toxicity.

#### 250 **1.2 Study Calendar**

251 Schedule of activities are listed in [Section 10.0](#)

#### 252 **1.3 Schema**

253 This study is composed of the following periods: Screening, treatment, active follow-up (FU), and  
254 long-term follow-up. Participants will be considered “on study” during screening, treatment and  
255 active FU periods. During the long-term FU period the participants will be considered “off study” (i.e.



256 no study-related procedures with the participant). An overview of the study schema is presented in  
 257 Figure 1–1.

258 **Figure 1–1: Study Schema**

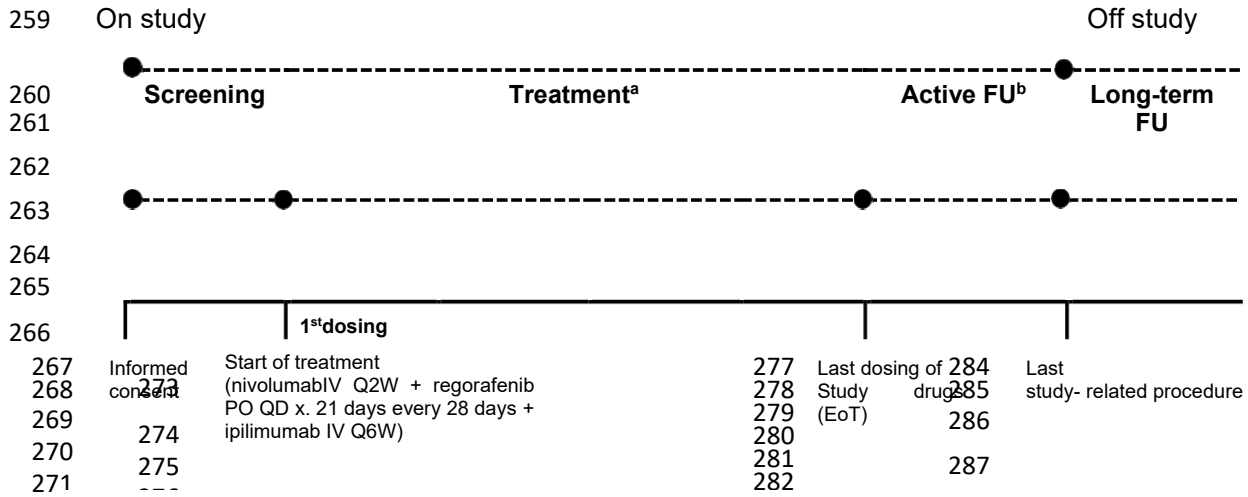

27 Abbreviations: C = cycle; D = day; EoT = End of treatment; FU = follow-up; i.v. = intra venous; LD = last dose; min = minute; q.d. = quaque die (once daily); Q4W = every 4 weeks; Q6W = every 6 weeks

- a. Nivolumab 240 mg, IV fusion, every 2 weeks (Q2W). Regorafenib starting dose 80 mg orally every day (QD.) for 21 days of every 28 days. Ipilimumab, 1 mg/kg, IV infusion, every 6 weeks. If starting dose is not tolerated, regorafenib dose should be de-escalated to 40 mg orally daily.
- b. Mandatory safety FU visit (at least 30 d after LD of regorafenib/ipilimumab/nivolumab and 100 d after LD of immunotherapy) and other active FU visits to collect safety and efficacy information for participants who discontinue study treatment without disease progression, if applicable.

288 **2.0 OBJECTIVES**

---

289 **2.1 Primary Objectives**

- 290 ○ The primary endpoint of this study is to determine the recommended dose level of the  
291 combination of regorafenib, nivolumab and ipilimumab in patients with advanced metastatic  
292 colorectal cancer

293 **2.2 Secondary Objectives**

- 294 ○ Assess the objective overall response rate per RECIST v1.1  
295 ○ Estimate the duration of response, duration of stable disease (SD), progression free survival  
296 (PFS), and overall survival (OS)  
297 ○ Describe the safety of this regimen as determined by frequency and severity of associated  
298 adverse events  
299 ○ Describe the safety of a variant dosing strategy in 10 patients with an initial dose of regorafenib  
300 40mg/ day on cycle 1 followed by escalation to 80 mg/day on cycle 2 and beyond

301 **2.3 Exploratory Objectives**

- 302 ○ Correlate the presence of colony stimulating factor 1 receptor (CSF1R)+ macrophages,  
303 regulatory T cells (Tregs), TILs (tumor infiltrating lymphocytes) and tumor PD-L1, CTLA-4 and PD-  
304 1 expression (at baseline and post treatment) on tumor biopsies with response rate  
305 ○ Characterize the systemic immune alteration through evaluation of mandatory pre and post  
306 cycle 1, and cycle 2, and at progression blood draws  
307

## 308 3.0 BACKGROUND

---

### 309 3.1 Standard Treatment of Metastatic Colorectal Cancer

310 Metastatic colorectal cancer remains the second cause of cancer death in the US, with an estimated 51,000  
311 deaths in 2019 (American Cancer Society, [www.cancer.org](http://www.cancer.org)). While systemic chemotherapy and targeted  
312 therapy has evolved significantly over the last 20 years[1, 2], cures with systemic treatment remain elusive  
313 and 5-year overall survival rates remain dismal (14% for patients diagnosed between 2008 and 2014).

314 Systemic 5-fluorouracil (5-FU) based chemotherapy remains the mainstay of management for mCRC. The  
315 addition of irinotecan and oxaliplatin to 5-FU has improved the OS to a median of 21 months [3, 4]. With the  
316 addition of VEGF or EGFR targeting, the median OS in patients with mCRC has now reached to more than 30  
317 months [5]. Therefore, the current standard of care for first-line treatment is combination cytotoxic  
318 chemotherapy using the fluoropyrimidine backbone (5-FU or capecitabine) with either oxaliplatin (FOLFOX  
319 or XELOX) or irinotecan (FOLFIRI or XELIRI) in combination with the anti-VEGF agent bevacizumab or anti-  
320 EGFR agents (cetuximab or panitumumab) for patients with left-sided, wild-type *RAS* and *BRAF*. Even as the  
321 disease progresses through initial lines of therapy, many patients maintain an adequate performance status  
322 to tolerate further therapy.

### 323 3.2 Third- or Later-line Therapy for Metastatic Colorectal Cancer

324 Limited treatment options are available for patients with metastatic colorectal cancer beyond 2 lines of  
325 therapies [6]. Based on OS benefit of the Phase III CORRECT trial, regorafenib was approved by the US Food  
326 and Drug Administration (FDA) for the treatment of mCRC patients who progressed following a  
327 fluoropyrimidine, oxaliplatin, irinotecan, bevacizumab, and an anti-EGFR when appropriate [7]. TAS-102, an  
328 oral agent that combines trifluridine and tipiracil hydrochloride, was approved by FDA in similar settings  
329 based on the improvement in overall survival compared to placebo (7.1 months vs 5.3 months, HR=0.68,  
330 95% CI, 0.58 to 0.81; P<0.001) [8]. The limited added benefit in OS with these two agents calls for more  
331 efficacious treatment options in this patient population.

### 332 3.3 Immunotherapy for Colorectal Cancer

333 Colorectal tumors with MSI-H are associated with high mutation load, increased tumor infiltrating  
334 lymphocytes, and high expression of checkpoints such as PD-1, Lag 3, and CTLA-4 [9]. Indeed, the targeting of  
335 PD-1 in patients with MSI-H has been associated with robust clinical responses, while little to no activity has  
336 been reported in tumors with microsatellite stability [10]. In preclinical and clinical settings, the combination  
337 of PD-1 inhibition and CTLA-4 inhibition has provided enhanced activity over anti-PD-1 monotherapy [11,  
338 12]. Indirect comparisons suggest that nivolumab plus ipilimumab provides improved efficacy relative to  
339 nivolumab monotherapy alone in MSI-H mCRC (ORR 31% with nivolumab alone and 55% with nivolumab  
340 plus ipilimumab) [13, 14]. Such significant activity has led to a trial of combined PD-1/CTLA-4 targeting in the  
341 first line treatment of MSI-H colorectal cancer, where a 60% ORR was reported [15].

342 In MSS CRC tumors, PD-1 inhibition showed limited antitumor activity even after selecting for PD-L1 positive  
343 tumors [16]. The challenge of expanding the benefit of immunotherapy to patients with MSS colorectal  
344 cancer has been further demonstrated in IMblaze370 trial, where atezolimumab alone or in combination  
345 with cobimetinib did not improve the overall survival compared to regorafenib [17]. However, concurrent  
346 PD-1 and CTLA-4 targeting has been associated with an improved OS over best supportive care in patients  
347 with MSS advanced refractory colorectal cancer [18]. Although not significant enough to support clinical  
348 implementation, it does suggest that adding anti-CTLA-4 may improve the efficacy of PD-1 inhibition in an  
349 MSS population. Mechanistically, PD-1 inhibition and CTLA-4 inhibition act synergistically to promote T-cell  
350 antitumor immunity through complementary roles of action. Anti-CTLA-4 causes peripheral expansion of  
351 TCR clonotypes and PD-1 inhibition boosts this anti-tumor immune response by overcoming T cell  
352 exhaustion[19].

### 353 **3.4 Immunomodulatory effects of Regorafenib**

354 Regorafenib is a small molecular inhibitor targeting kinases involved in tumor angiogenesis and oncogenesis.  
355 The superior OS benefit in CORRECT trial (6.4 months vs 5.0 months, hazard ratio 0.77; 95% CI 0.64-0.94),  
356 has led to the approval of regorafenib for the treatment of mCRC patients in 3<sup>rd</sup> or later lines of therapy  
357 [7]. Pre-clinical studies have demonstrated the enhanced concomitant anti-tumor activity of regorafenib and  
358 anti-PD-1 in in vivo CRC models [20]. Mechanistically, this effect may be mediated by a reduction of tumor  
359 associated macrophages (TAM) and reprogramming of TAMs toward M1 phenotype by the inhibition of CSF-  
360 1R by regorafenib [20], suppression of interferon gamma induced PD-L1 and IDO1 expression [21], and  
361 inhibition of VEGFR and its signaling pathway which may normalize tumor blood vessels and thereby  
362 improving cytotoxic T cell infiltration [22]. In addition, tumor biopsies from responding mCRC patients  
363 treated with regorafenib and nivolumab have shown a decrease in regulatory T-cells, therefore decreasing  
364 the immune suppressive processes in the tumor [23].

### 365 **3.5 Rational for regimen development**

366 There are limited treatment options for patients with mCRC after 2 lines of chemotherapy [6]. Significant  
367 interest has emerged in immunotherapy as a potential therapeutic strategy in mCRC. PD-1 inhibition, with  
368 or without CTLA-4 inhibitors, showed significant activity in patients with metastatic colorectal cancers in the  
369 setting of microsatellite instability (MSI-H), especially in patients with higher tumor mutation burdens [10,  
370 13, 14, 24]. Such significant activity has led to the investigation of PD-1/CTLA-4 inhibitors in the first line  
371 treatment of MSI-H colorectal cancer. Indeed, recent data with the combination of the PD-1 inhibitor  
372 nivolumab and the CTLA-4 inhibitor ipilimumab showing promising response rates (RR) and progression free  
373 survivals (PFS) that surpasses historical data reported with chemotherapy [25]. However, microsatellite  
374 stable (MSS) tumors, have been proven resistant to anti-PD1 therapy, even when selecting for PD-L1  
375 positivity [16]. There remains a significant unmet need to identify effective immunotherapy strategies for  
376 the 95% of metastatic colorectal cancers with MSS. One approach to improve on the activity of anti-PD-  
377 1/PDL-1 in MSS colorectal cancer is through concurrent CTLA-4 targeting. The combination of durvalumab  
378 plus tremelimumab in MSS colorectal cancer with progression on standard chemotherapy has been  
379 associated with an improvement in the median OS from 4.1 months (best supportive care) to 6.6 months  
380 (HR = 0.72) [18]. These improvements were not deemed of significant clinical magnitude to support the  
381 routine implementation of this regimen in metastatic colorectal cancer. However, it does support PD-  
382 1/CTLA-4 targeting as a regimen to build on in MSS colorectal cancer.

383 Regorafenib has immunomodulatory effects with pre-clinical studies showing beneficial combinatorial  
384 effects of regorafenib and anti-PD-1 in CRC in vivo models [20]. Recent clinical data has shown robust clinical  
385 activity with the combination of regorafenib and nivolumab in MSS chemotherapy-refractory colorectal  
386 cancers (RR 33%, median PFS 6.3 mo) [23]. We have treated 18 mCRC patients with this regimen, with 13  
387 patients experiencing progressive disease (PD) on their first CT scan while 5 patients experienced stable  
388 disease (SD) and Carcinoembryonic Antigen (CEA) response (unpublished data). In addition, personal  
389 communication regarding the ongoing USA phase II trial of regorafenib + nivolumab suggest that the clinical  
390 benefits are considerably less than previously reported by the Japanese REGONIVO clinical study. Therefore,  
391 we hypothesize that the 33% RR reported on the Regorafenib plus Nivolumab trial is likely overrepresenting  
392 the efficacy of this regimen, and concurrent CTLA-4 inhibition may improve its efficacy. The purpose of this  
393 study is to investigate the combination of regorafenib, nivolumab, and ipilimumab (RIN) in MSS metastatic  
394 colorectal patients who progressed on standard systemic therapy to determine the safety and feasibility of  
395 this regimen and describe its clinical activity in an expanded safety cohort. We hypothesize that the  
396 combination of regorafenib, nivolumab and ipilimumab may result in improved efficacy.

397 Upon the completion of the enrollment of the intended cohort, we have noted significant clinical benefits  
398 that support the investigation of this regimen. In the first 13 patients enrolled on this study, only 3 patients  
399 had progressive disease on the first imaging study (2 months), one of whom had subsequent disease  
400 regression at the 4-month mark (pseudo-progression). Therefore, the disease control rate in the treatment  
401 evaluable patients has been 11/13 patients. These results are highly promising in a refractory patient  
402 population where the disease control rate with other alternative therapies (trifluridine or regorafenib) are  
403 only 40% at 2 months. Seven patients had a radiographic assessment at 4-month so far, only 1 of whom had

404 progressive. All 6/7 patients that were evaluable at the 4-month mark has disease regression, two of who  
405 satisfied PR definition. In contrast, available FDA approved agents for our patient population (trifluridine or  
406 regorafenib monotherapy) have a response rate of 1%. Based on these initial exciting data, we are confident  
407 that our regimen will be explored further in patients with refractory colorectal cancer.

408 As we prepare to investigate this regimen in larger studies, it will be important to further refine toxicity  
409 management, especially as to what applies to regorafenib and immunotherapy related toxicity. Particularly,  
410 a transient grade 3 rash has been noted in our study (39% (9 out of 23) of patients who completed 1+  
411 months of treatment) and other combination of regorafenib and nivolumab studies. This rash was non-DLT  
412 defining, occurred in the first cycle of treatment, responds promptly (with complete resolution within 1  
413 week) to a short course of steroids, and does not recur with resumption of study treatment after rash  
414 resolution. We hypothesize that this rash is related to an initial “flare” associated with study treatment and  
415 should not lead to permanent dose reductions or modification is subsequent study dose treatment. We are  
416 therefore proposing an additional 10-patient cohort with alternative dose modification to address the safety  
417 of re-escalation of regorafenib to the recommended dose in patients treated with RIN.

### 418 **3.6 Overview of Study Design**

419 This is a single-center safety and efficacy-assessment clinical trial [26]with regorafenib, nivolumab and  
420 ipilimumab for MSS metastatic colorectal patients who progressed on standard systemic therapy. The trial  
421 will follow a 3+3 design, followed by a treatment expansion cohort at the RP2D.

422 A cohort of 3 patients will be enrolled at the first dose level of regorafenib of 80mg orally once a day x 21  
423 days every 28 days along with nivolumab 240 mg IV Q2weeks and ipilimumab 1mg/kg IV every 6 weeks. If 1  
424 or less patients experience a DLT (defined in [Section 11.1.](#)), 3 additional patients will be enrolled on this  
425 cohort. If no more than 1 patient has a DLT out of 6 patients, this dose will be considered the recommended  
426 expansion dose. If 2 or more patients out of 6 or less patients at the first dose level have a DLT, an  
427 alternative dose of regorafenib of 40 mg x 21 days every 28 days will be investigated for safety in a similar 3  
428 + 3 design. If the lower dose is deemed non-tolerable the study will be suspended.

429 An expansion cohort of 20 patients will be treated at the recommended dose of the combination of  
430 regorafenib, ipilimumab, and nivolumab (RIN). This cohort will provide additional data on the safety and  
431 tolerability of the recommended dose level of RIN while providing some additional efficacy information that  
432 will guide further the development of this study.

433 Now that we have completed enrollment on the expansion cohort, an additional 10-patient cohort will be  
434 enrolled on study and will interrogate regorafenib starting dose of 40mg per day on cycle 1, followed by 80  
435 mg daily starting cycle 2 (in the event no dose limiting toxicities related to regorafenib are noted on cycle 1).  
436 This cohort will provide additional clinical safety to support re-escalation of regorafenib.

### 437 **3.7 Justification for Dose**

438 The starting dose and schedule of regorafenib and nivolumab is based on the phase 1 clinical trial presented  
439 by Shitara et al. at ASCO 2019[27]. A fixed dose of nivolumab will be used instead of 3mg/kg for the purpose  
440 of convenience. Such substitution (240 mg dosing) has become a standard approach for 3mg/kg dosing. This  
441 dose level was deemed tolerable and was associated with significant efficacy in patients with metastatic  
442 colorectal cancer who are resistant to standard therapies. In addition, ipilimumab will be dosed at 1mg/kg  
443 every 6weeks. This combination is based on the safety of this dose in combination with nivolumab at  
444 3mg/kg Q2 weeks in a large metastatic MSI-H colorectal cancer cohort [25]. We do not expect intolerance to  
445 the combination of triple regimen given the excellent tolerance of the doublets regorafenib + nivolumab and  
446 nivolumab + ipilimumab at the proposed doses and therefore the propose start at the recommended doses  
447 of these doublet combinations. We have built in a dose de-escalation path in the event unexpected toxicity  
448 is noted at the first dose level.

449

450

## 451 4.0 STUDY POPULATION

---

452 Participants must meet the following criteria on screening examination to be eligible to participate in the  
453 study:

### 454 4.1 Inclusion Criteria

455 Participants are eligible to be included in the study only if all of the following criteria apply:

- 456 1. A signed informed consent must be obtained prior to conducting any study-specific procedures.
- 457 2. Male and female adult participants 18 years of age or older on day of signing informed consent.
- 458 3. Histological or cytological confirmed advanced, metastatic, or progressive pMMR/MSS  
459 adenocarcinoma of colon or rectum.
  - 460 a) Microsatellite status should be performed per local standard of practice (e.g., IHC and/or  
461 PCR, or next-generation sequencing). Only participants with pMMR/MSS mCRC are  
462 eligible.
- 463 4. Known extended RAS and BRAF status as per local standard of practice.
- 464 5. Participant must have progressed following exposure of all the following agents or below:
  - 465 ○ Prior exposure to the following:
    - 466 a) Fluoropyrimidines (capecitabine or 5-FU)
    - 467 b) Irinotecan
    - 468 c) Oxaliplatin
    - 469 d) Anti-EGFR therapy if RAS and BRAF wild type with left colon primary  
470
  - 471 ○ Patient must have evidence of progression on or after the last treatment regimen  
472 received and within 6 months prior to study enrollment
  - 473 ○ Patients who were intolerant to prior systemic chemotherapy regimens are eligible if  
474 there is documented evidence of clinically significant intolerance despite adequate  
475 supportive measures.
  - 476 ○ Adjuvant/neoadjuvant chemotherapy can be considered as one line of chemotherapy  
477 for advanced/metastatic disease if the participant had disease recurrence within 6  
478 months of completion
- 479 6. ECOG Performance Status of 0 to 1 ([Appendix A](#)).
- 480 7. Adequate hematologic and organ function as assessed by the following laboratory tests  
481 performed within 7 days before treatment initiation:
  - 482 ● Total bilirubin  $\leq 1.5$  x the upper limit of normal (ULN)
  - 483 ● Alanine transaminase (ALT) and aspartate aminotransferase (AST)  $\leq 3$  x ULN if no  
484 liver metastases; ALT or AST  $\leq 5$  x ULN allowed for patients with liver involvement
  - 485 ● Platelet count  $\geq 100,000$  /mm<sup>3</sup>, Hemoglobin (Hb)  $\geq 9$  g/dL, WBC  $\geq 2000$ / $\mu$ L and absolute  
486 neutrophil count (ANC)  $\geq 1500$ /mm<sup>3</sup>
  - 487 ● Serum creatinine  $\leq 1.5$  x ULN or creatinine clearance  $\geq 40$  mL/min (measured or  
488 calculated using the Cockcroft-Gault formula)
- 489 8. Measurable disease as determined by RECISTv1.1
- 490 9. Provision of recent tumor tissue (as defined below) is mandatory for all participants at  
491 screening (Formalin-fixed paraffin-embedded block or minimum of 20slides).
  - 492 ● Tumor tissue obtained within 180 days of enrollment and after the last dose of most

493 recent anti-cancer therapy  
494 • Or a new biopsy  
495 Exceptions for patients with no recent baseline tumor tissues or biopsies may be considered after  
496 documented discussion and approval with the PI of the study  
497 10. Anticipated life expectancy greater than 3months  
498 11. Be able to swallow and absorb oral tablets.  
499 12. Women of childbearing potential (WOCBP) must agree to follow instructions for method(s) of  
500 contraception for the duration of study intervention and 120 days after last dose of regorafenib  
501 and 5 months after the last dose of nivolumab. Males who are sexually active with WOCBP must  
502 agree to follow instructions for method(s) of contraception for the duration of study intervention  
503 and 120 days after last dose of regorafenib and 7 months after the last dose of nivolumab. In  
504 addition, male participants must be willing to refrain from sperm donation during this time.  
505 Contraceptive use by men or women should be consistent with local regulations regarding  
506 the methods of contraception for those participating in clinical studies. Please refer to  
507 Appendix B for more information.

#### 508 **4.2 Exclusion Criteria**

509 Participants are excluded from the study if any of the following criteria apply:

- 510 1. Participants with MSI-H colorectal cancer
- 511 2. Prior therapy with regorafenib, anti-PD-1, PD-L1, or CTLA-4 inhibitors
- 512 3. Systemic anti-cancer treatment within 14 days or less than 5 half-lives (whichever is shorter) of  
513 the first dose of study treatment
- 514 4. Has unresolved clinically significant toxicity of greater than or equal to National Cancer Institute  
515 Common Terminology Criteria for AEs (NCI-CTCAE, v5.0) Grade 2 attributed to any prior therapies  
516 (excluding anemia, lymphopenia, alopecia, skin pigmentation, and platinum-induced  
517 neurotoxicity)
- 518 5. Arterial or venous thrombotic or embolic events such as cerebrovascular accident (including  
519 transient ischemic attacks), deep vein thrombosis or pulmonary embolism within 3 months before  
520 the start of study medication (except for adequately treated catheter-related venous thrombosis  
521 occurring more than one month before the start of study medication)
- 522 6. Congestive heart failure  $\geq$  New York Heart Association (NYHA) class 2 ([Appendix G](#))
- 523 7. Unstable angina (angina symptoms at rest), new-onset angina (begun within the last 3 months),  
524 myocardial infarction less than 6 months before start of study drug
- 525 8. Uncontrolled cardiac arrhythmias
- 526 9. Poorly controlled hypertension, defined as a blood pressure consistently above 150/90 mmHg  
527 despite optimal medical management
- 528 10. Persistent proteinuria of NCI-CTCAE Grade 3. Urine dipstick result of 3+ or abnormal, based on  
529 type of urine test strip used, is allowed if protein excretion (estimated by urine protein/creatinine  
530 ratio on a random urine sample) is  $<3.5$  g/24 hr
- 531 11. Major surgical procedure or significant traumatic injury within 28 days before start of study  
532 medication. Note: If participants received major surgery, they must have recovered adequately  
533 from the toxicity and/or complications from the intervention prior to starting therapy
- 534 12. Non-healing wound, non-healing ulcer, or non-healing bone fracture
- 535 13. Participants with evidence or history of any bleeding diathesis, irrespective of severity

- 536 14. Any hemorrhage or bleeding event  $\geq$  NCI-CTCAE Grade 3 within 28 days prior to the start of study  
537 medication
- 538 15. Significant acute gastrointestinal disorders with diarrhea as a major symptom e.g., Crohn's  
539 disease, malabsorption, or  $\geq$  NCI-CTCAE Grade 2 diarrhea of any etiology.
- 540 16. Participants with an active, known or suspected autoimmune disease. Participants with type I  
541 diabetes mellitus (T1DM), hypothyroidism only requiring hormone replacement, skin disorders  
542 (such as vitiligo, psoriasis, or alopecia) not requiring systemic treatment, or conditions not  
543 expected to recur in the absence of an external trigger are permitted to enroll.
- 544 17. Participants with a condition requiring systemic treatment with either corticosteroids ( $>10$  mg  
545 daily prednisone equivalent) or other immunosuppressive medications within 14 days of start of  
546 study treatment. Inhaled or topical steroids, and adrenal replacement steroid doses  $>10$  mg daily  
547 prednisone equivalent, are permitted in the absence of active autoimmune disease.
- 548 18. History of (non-infectious) pneumonitis that required steroids or current pneumonitis
- 549 19. History of interstitial lung disease
- 550 20. Subjects with previous malignancies (except non-melanoma skin cancers, and the following in situ  
551 cancers: bladder, gastric, colon, cervical/dysplasia, melanoma, or breast) are excluded unless a  
552 complete remission prior to study entry and no additional therapy is required or anticipated to be  
553 required during the study period.
- 554 21. Diagnosis of immunodeficiency or is receiving chronic systemic steroid therapy (in dosing  
555 exceeding 10 mg daily of prednisone equivalent) or any other form of immunosuppressive  
556 therapy.
- 557 22. Presence of symptomatic central nervous system (CNS) metastases, or CNS metastases that  
558 require local CNS-directed treatment (such as radiotherapy or surgery). Participants with stable  
559 CNS disease or previously treated lesions are eligible for study entry. In addition, subjects must be  
560 either off corticosteroids, or on a stable or decreasing dose of 10 mg daily prednisone (or  
561 equivalent).
- 562 23. Ongoing infection  $>$  Grade 2 NCI-CTCAE requiring systemic therapy.
- 563 24. Known history of human immunodeficiency virus (HIV) infection (HIV 1/2 antibodies).
- 564 25. Any positive test result for hepatitis B virus (HBV) or hepatitis C virus (HCV) indicating presence of  
565 virus, e.g. Hepatitis B surface antigen (HBsAg, Australia antigen) positive, or Hepatitis C antibody  
566 (anti-HCV) positive (except if HCV-RNA negative).
- 567 26. Pregnancy or breast feeding.
- 568 27. Psychological, familial, or sociological condition potentially hampering compliance with the study  
569 protocol and FU schedule.
- 570 28. Previous treatment with live vaccine within 30 days of planned start of study drugs (seasonal flu  
571 vaccines that do not contain a live virus are permitted).
- 572 29. Known hypersensitivity to any of the study drugs, study drug classes, or excipients in the  
573 formulation.



## 574 **5.0 PARTICIPANT ENROLLMENT**

---

### 575 **5.1 Pre-Enrollment Informed Consent and Screening Procedures**

576 Diagnostic or laboratory studies performed exclusively to determine eligibility will be done only after  
577 obtaining written informed consent. Studies or procedures that are performed for clinical indications (not  
578 exclusively to determine study eligibility) may be used for baseline values and/or to determine pre-  
579 eligibility, even if the studies were done before informed consent was obtained. The informed consent  
580 process is to be fully documented (see [Section 17.4](#)), and the prospective participant must receive a copy of  
581 the signed informed consent document. Screening procedures are listed in [Section 10.0](#).

### 582 **5.2 Participant Enrollment**

583 Eligible participants will be registered on the study centrally by the DCC at City of Hope. DCC staffs are  
584 available between the hours of 8:00 a.m. and 5:00 p.m. PST, Monday through Friday (except holidays).

- 585 ○ Phone: (626) 256-4673 ext. 83968
- 586 ○ E-mail: [DCC@coh.org](mailto:DCC@coh.org)

### 587 **5.3 Slot verification and reservation**

588 Designated study staff should call the DCC to verify current slot availability, and to reserve a slot for a  
589 specific prospective subject. Slots can only be held for a limited time.

590 The DCC should be notified of cancellations of prospective participants holding slots as soon as possible.

### 591 **5.4 Registration Process**

592 To register a participant, the subsequent procedure is to be followed.

- 593 1. The participating site's data manager/coordinator/research nurse should contact the DCC via telephone  
594 or email to provide notification regarding the pending registration and communicate desired timeline of  
595 the registration, especially if it must be completed promptly to meet the registration window.
- 596 2. The data manager/coordinator/research nurse should then e-mail copies to [DCC@coh.org](mailto:DCC@coh.org) of the  
597 following documents to the DCC:

- 598 • Completed Eligibility Criteria List ([Section 4.0](#) of the protocol)
- 599 • Source documentation to support eligibility criteria\*\*
- 600 • Signed subject's bill of rights and informed consent document
- 601 • Signed HIPAA authorization form (if separate from the informed consent document)
- 602 \*\*Provide copies of source documentation only if not readily available as a finalized record in a  
603 COH Electronic Health Record (EHR).

604 3. After having received all transferred documentation, the DCC will complete their review of the  
605 documents to verify eligibility, working with the participating site as needed to resolve any missing  
606 required source elements. A participant failing to meet all protocol eligibility requirements will not be  
607 registered.

608 4. Once eligibility has been confirmed, DCC staff will register the participant by: assigning a subject  
609 accession number, registering the subject on study centrally into the COH clinical trials management  
610 system for non-COH participants, and enter the subject into the eCRF system.

611 5. Once registration has been completed, DCC staff will send a Confirmation of Registration Form within 24  
612 hours, including the participant study number to:

- 613 • The study team: treating investigator, protocol nurse, biostatistician, CRC and pharmacy
- 614 • The COH sponsor team designees, including Study PI

### 615 **5.5 Screen Failures and Registered Participants Who Do Not begin Study Treatment**

616 Issues that would cause treatment delays should be discussed with the Principal Investigator.

617 The DCC is to be notified of all participants who sign consent but do not meet eligibility criteria or do not  
618 initiate protocol therapy.

619 **5.6 Dose Level Assignment**

620 Dose escalation/de-escalation will be assigned to a dose level per [Section 6.3](#). Expansion cohort participants  
621 will be assigned to the tolerable dose level defined during the dose escalation/de-escalation process.

## 622 6.0 TREATMENT PROGRAM

---

### 623 6.1 Treatment Program Overview

624 This is a single-center safety and efficacy-assessment clinical trial with regorafenib, nivolumab and  
625 ipilimumab for MSS metastatic colorectal cancer patients who progressed on standard systemic therapy.

626 The study consists of 2 stages:

- 627 ○ **Dose Escalation/de-escalation Stage** (Section 6.3) to define the recommended dose and  
628 evaluate safety/tolerability of the combination regimen and
- 629 ○ **Expansion Stage** (Section 6.5) to preliminary evaluate activity or futility of the combination  
630 regimen

631 Protocol therapy will be administered in an outpatient basis until unacceptable toxicities or progression or  
632 treatment completion, whichever comes first. Treatment cycles will be 28 days.

633 Participants who achieve complete response (CR) per RECIST v1.1 and discontinue initial combination  
634 therapy may enter the **Re-treatment Phase** per investigator discretion (Section 6.8).

635 If one agent is discontinued due to toxicity, then the participant may continue with the other one or two  
636 agents depending on the nature of the toxicity.

637 Follow-up will occur post-treatment (Section 6.7)

638 Windows for all assessments and treatments are detailed in Section 10.0.

### 639 6.2 Cycle Definition

640 Treatment cycle will be a fixed 28 days (i.e. cycle count continues despite a hold in study agent/regimen). A  
641 new cycle is defined by the start date of a new cycle of regorafenib.

### 642 6.3 Dose Escalation/de-escalation Treatment Plan

643 A slightly modified 3+3 design will be used for dose escalation/de-escalation, up to 6 evaluable participants  
644 per dose level will be enrolled (Dose Escalation/de-escalation Schema 6.4). Two dose levels may be tested. If  
645 Dose Level 1 is not tolerable, Dose Level -1 will be tested (Table 6.3).

646 Regorafenib will be given at 80mg orally once daily x 21 days every 28 days and will be combined with fixed  
647 doses of nivolumab and ipilimumab.

648 A cohort of 3 patients will be enrolled at the first dose level of regorafenib of 80mg, if 1 or less patients  
649 experience a DLT, an addition 3 patients will be enrolled on cohort. If no more than one patient has a DLT  
650 out of 6 patients, this dose will be recommended for the expansion dose. If 2 or more patients have a DLT  
651 when treated at the first dose level, an alternative dose of regorafenib of 40 mg x 21 days every 28 days will  
652 be investigated for safety in a similar 3 + 3 design. If the lower dose is deemed non-tolerable the study will  
653 be suspended.

654 The determination of RP2D will be based on dose limiting toxicity observed from the time of first  
655 administration of RIN (cycle 1 day 1) until the planned administration of the third dose of nivolumab (cycle 2  
656 day 1) that are attributable to any of the 3 agents or their combination.

### 657 Table 6.3 Dosing Regimen and Schedule

| Dose Level    | Regorafenib<br>(Orally, once daily x 21 days<br>every 28 days) | Nivolumab<br>(IV, Q2weeks) | Ipilimumab<br>(IV, every 6 weeks) |
|---------------|----------------------------------------------------------------|----------------------------|-----------------------------------|
| Dose Level -1 | 40 mg                                                          | 240 mg                     | 1 mg/kg                           |

|                                    | <b>Dose Level</b>   | <b>Regorafenib</b><br>(Orally, once daily x 21 days every 28 days) | <b>Nivolumab</b><br>(IV, Q2weeks) | <b>Ipilimumab</b><br>(IV, every 6 weeks) |
|------------------------------------|---------------------|--------------------------------------------------------------------|-----------------------------------|------------------------------------------|
| <i>Initial starting dose level</i> | <b>Dose Level 1</b> | <b>80 mg</b>                                                       | <b>240 mg</b>                     | <b>1 mg/kg</b>                           |

658

659 **6.4 Dose Escalation/de-escalation Schema**

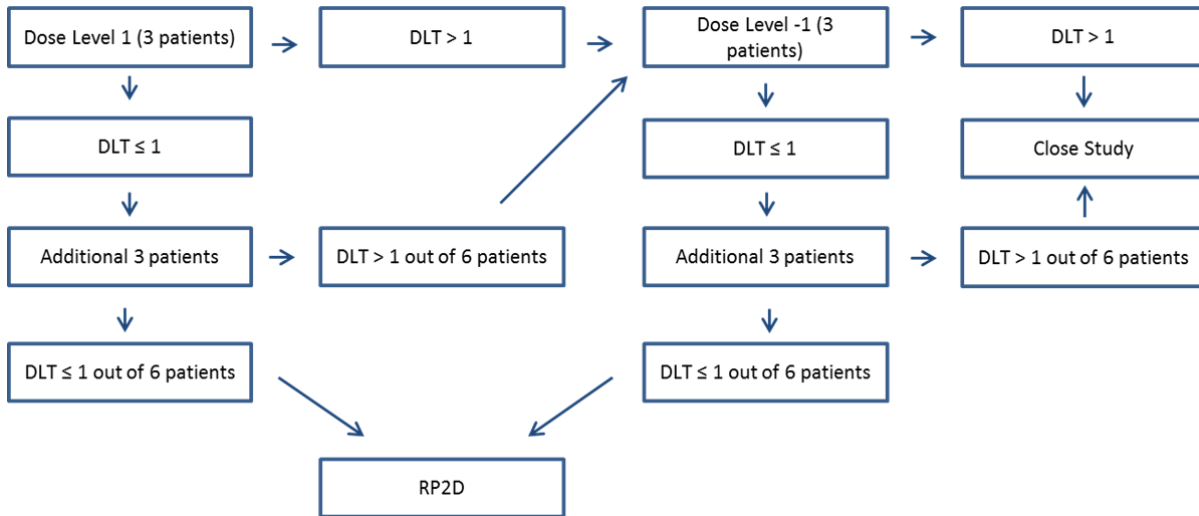

660

661 **6.5 Expansion Cohort Treatment Plan**

662 Expansion cohort participants will be enrolled at the tolerable dose level defined by dose finding (Section 6.3). Accrual will continue until 20 evaluable participants at the recommended dose are treated. An additional 10-patient cohort will be added to the 20-patient expansion to investigate the possibility of lower starting dose of regorafenib of 40mg/day on cycle 1, followed by escalation to 80mg/day on cycle 2, as an alternative strategy to mitigate grade 3 and higher skin toxicities.

667 Patients enrolled during the dose escalation/de-escalation will be included along with the Expansion Stage for efficacy and safety analysis.

669 See Section 12.0 for details.

670 **6.6 Duration of Therapy and Criteria for Removal from Protocol Therapy**

671 Participants will receive protocol therapy with study agent(s) until one of the below criteria are met:

- 672 ○ Confirmed disease progression
- 673 • **Note:** Participants with confirmed radiographic progression per RECIST v1.1 who are clinically stable but do not meet irRECIST (Appendix D) criteria for progression can continue to receive protocol therapy following consultation of the Study PI.
- 674
- 675
- 676 ○ The investigator determines that the participant does not require further therapy because the participant attained a **confirmed CR per RECIST v1.1** AND was treated for at least 8 cycles with combination therapy AND had at least 2 cycles of combination therapy beyond the date when the initial CR was declared
- 677
- 678
- 679
- 680 • Refer to Section 6.8 for details regarding re-initiation of therapy for these participants.
- 681 ○ For CR participants who met criteria in Section 6.10 and re-initiated therapy: Received re-treatment for ~ 12 months
- 682
- 683 ○ Participant is deemed intolerant to protocol therapy because of toxicity, despite dose modification/ delay
- 684

- 685 • **Note:** If one agent is discontinued due to toxicity, then the participant may continue to receive  
686 the other study agent(s) as long as there is clinical benefit
- 687 ○ General or specific changes in the patient's condition which render the patient not candidate for  
688 further treatment in the judgment of the investigator
- 689 ○ Withdrawal of consent for further protocol therapy ([Section 17.5](#))

690 Once participants meet criteria for removal from protocol therapy, the participant should then proceed to  
691 End of Treatment assessments, and then to follow-up ([Section 6.7](#)).

692 Documentation of the reason for discontinuing protocol therapy and the date effective should be made in  
693 the Electronic Health Record/medical record and appropriate eCRF. The COH DCC and the Study PI should  
694 be promptly notified of the change in participant status.

## 695 **6.7 Follow-Up**

696 Following completion of protocol therapy, all participants will enter follow-up after End of Treatment  
697 assessments.

698 The following assessments may occur concurrently.

- 699 ○ **Follow-up for safety-** (i) 30 days post-last dose of study treatment AND (ii) 90 days post-last dose of  
700 immunotherapy OR until initiation of a new anticancer therapy (whichever occurs sooner)
- 701 • **Note** the period for safety follow-up will be extended until stabilization or resolution for all  
702 serious AEs (per the agreement of the Study PI) and accompanying follow-up safety report.
- 703 ○ **Follow-up for response-** for those who have yet to progress
- 704 ○ **Follow-up for survival-** for those who progressed or ended response follow-up.

705 Assessment time points and windows are detailed in [Section 10.0](#).

## 706 **6.8 Re-Initiation of Treatment If Previously Achieved CR (Re-Treatment Phase)**

707 Participants with radiographic disease progression may re-initiate treatment per investigator discretion if:

- 708 1. Participants stopped initial treatment with combination therapy after attaining an investigator-  
709 determined confirmed CR according to RECIST 1.1, **AND**
- 710 2. Was treated for at least 8 cycles with combination therapy before discontinuing therapy; **AND**
- 711 3. Received at least 2 cycles of combination therapy beyond the date when the initial CR was declared

712 If re-initiation of therapy is being considered, such **participants must meet criteria** in [Section 6.10](#) to  
713 receive ~12 month of re-treatment.

714 If criteria in [Section 6.10](#) are met, participants should be re-treated at the same dose as when they last  
715 received protocol therapy.

716 Participants will be monitored for unacceptable toxicity ([Section 11.1](#)).

717 Participants who meet criteria in [Section 6.6](#) to discontinue therapy will enter follow-up per [Section 6.7](#).

## 718 **6.9 Duration of Study Participation**

719 Study participation may conclude when any of the following occur:

- 720 ○ Completion of study activities (treatment/ re-treatment and 5 years of follow-up)
- 721 ○ Withdrawal of consent ([Section 17.5](#))
- 722 ○ Participant is lost to follow-up. All attempts to contact the participant must be documented.
- 723 ○ At the discretion of the investigator for safety, behavioral, or administrative reasons
- 724 ○ Study closure with the IRB

725 Documentation of the reason for discontinuing study participation and the date effective should be made in  
 726 the Electronic Health Record/medical record and appropriate eCRF. The COH DCC should be promptly  
 727 notified of the change in participant status.

728 **6.10 Criteria to Initiate Re-Treatment with combination therapy**

729 Participants who achieved CR previously **must meet re-treatment criteria** below (Table 6.10) to receive re-  
 730 treatment with regorafenib, ipilimumab and nivolumab.

731 **Table 6.10 Criteria to Initiate Re-treatment with Combination Therapy**

| Criteria to be met in order to initiate Re-Treatment                                                                                                                                                                                                                                                                                                                        | Action if ALL criteria to the LEFT are NOT met                           |
|-----------------------------------------------------------------------------------------------------------------------------------------------------------------------------------------------------------------------------------------------------------------------------------------------------------------------------------------------------------------------------|--------------------------------------------------------------------------|
| 1. Participants stopped initial treatment with combination therapy after attaining an investigator-determined confirmed CR according to RECIST 1.1, <b>AND</b><br>Was treated for at least 8 cycles with combination therapy before discontinuing therapy; <b>AND</b><br>Received at least 2 cycles of combination therapy beyond the date when the initial CR was declared | Participant <b>can not</b> receive re-treatment with combination therapy |
| 2. Confirmed radiographic progression                                                                                                                                                                                                                                                                                                                                       |                                                                          |
| 3. Investigator determines re-treatment is in the best interest of the participant                                                                                                                                                                                                                                                                                          |                                                                          |
| 4. No anti-cancer treatment was administered since last dose of RIN protocol therapy                                                                                                                                                                                                                                                                                        |                                                                          |
| 5. ECOG $\leq$ 1                                                                                                                                                                                                                                                                                                                                                            |                                                                          |
| 6. Patient should satisfy all prior inclusion criteria with the exception of prior immunotherapy and regorafenib exposure (Section 4.1)                                                                                                                                                                                                                                     |                                                                          |
| 7. The trial is open (closure of study treatment on this trial is anticipated once last patient has progressed or discontinued because of toxicities)                                                                                                                                                                                                                       |                                                                          |

732

733

734

735 **7.0 STUDY INTERVENTION**

---

736 Study intervention is defined as any investigational intervention intended to be administered to a study  
737 participant according to the study protocol.

738 **7.1 Agent Administration**

739 Each treatment cycle will be 28 days in duration. Regorafenib will be administered as two 40 mg tablets  
740 q.d. for 21 days of every 28 days as a starting dose of 80 mg. If the starting dose of 80 mg daily is not  
741 tolerated, dose should be de-escalated to 40 mg orally daily starting with C2D1 as detailed above.

742 When combined with nivolumab and ipilimumab, regorafenib will be administered prior to the  
743 nivolumab and ipilimumab infusion.

744 If a participant misses a dose and > 6 hours have passed since the scheduled dose time, the missed  
745 dose will be skipped and will not be made up. Doses that are vomited will not be made up.

746 Participants will be given a drug diary to document each dose of regorafenib that is taken or missed  
747 ([Appendix E](#)).

748 Nivolumab (240 mg, Q2W) will be administered as a 30-minute IV infusion per standard institution  
749 practice.

750 The ipilimumab dose is fixed at 1 mg/kg intravenously over 30 minutes once every 6 weeks, as per  
751 standard institution practice, immediately following nivolumab administration.

752 **7.2 Preparation/Handling/Storage/Accountability**

753 The Investigator (or designee) must confirm appropriate temperature conditions have been maintained  
754 during transit for all study intervention received and any discrepancies are reported and resolved  
755 before use of the study intervention.

756 Study intervention should be stored in a secure locked location and at the recommended label  
757 temperature for the regorafenib 40 mg tablets in bottles, the nivolumab 100 mg/10 ml vials and the  
758 ipilimumab 200 mg/ 40 ml vials.

759 Note: The regorafenib bottle contains a desiccant. Once the drug has been received it has to be kept in  
760 a secure, dry location. The tablets must be stored in the original bottle according to the labeled storage  
761 advice. Regorafenib will be used as a commercial supply and be delivered to patient through a specialty  
762 pharmacy as is the standard process at City of Hope.

763 The personnel will use the study intervention only within the framework of this clinical study and in  
764 accordance with this protocol. Only participants enrolled in the study may receive study intervention  
765 and only authorized site staff may supply or administer study intervention. All study intervention must  
766 be stored in a secure, environmentally controlled, and monitored (manual or automated) area in  
767 accordance with the labeled storage conditions with access limited to the Investigator and authorized  
768 site staff. The Investigator, institution, or the head of the medical institution (where applicable) is  
769 responsible for study intervention accountability, reconciliation, and record maintenance (i.e., receipt,  
770 reconciliation, and final disposition records).

771 Further guidance and information for the final disposition of unused study interventions are provided in  
772 a separate document.

773 **7.3 Measures to Minimize Bias: Randomization and Blinding**

774 Randomization and blinding are not applicable for this study.

775 This is an open-label study and all open label intervention at all visits must be assigned by the IxRS for  
776 tracking and accountability purpose.

777 • **Participant identification**

778 After a participant has signed the PI/ICF, the participant will be assigned an identification number.

779 **7.4 Study Intervention Compliance**

780 The administration of intravenous nivolumab and ipilimumab will be performed in the clinical research  
781 unit at COH. The date and time of each infusion administered in the clinic will be recorded in the source  
782 documents and recorded in the electronic case report form (eCRF). Reasons for dose delay or infusion  
783 interruption will also be recorded in the source data and in the eCRF. The number of vials used will be  
784 recorded on the appropriate treatment dispensing form.

785 Participants will self-administer regorafenib at home, compliance with regorafenib will be assessed at  
786 each study visit. Compliance will be assessed by counting returned tablets. A record of the number of  
787 regorafenib tablets dispensed to and returned by each participant must be maintained and reconciled  
788 with regorafenib start and stop dates, including dates for dose delays and/or dose reductions which will  
789 also be recorded in the eCRF. Any discrepancies between actual and expected amount of returned  
790 study medication must be discussed with the participant at the time of the visit, and any explanation  
791 must be documented in the source records. An adequate record of receipt, distribution, and  
792 return/destruction of all study intervention must be kept.

793 **7.5 Concomitant Therapy**

794 **7.5.1 Drug-Drug Interactions Relevant for Regorafenib**

795 • **Inhibitors / Inducers of CYP3A4**

796 Concomitant use of strong inhibitors of CYP3A4 activity ([Appendix F](#)) are not permitted as their  
797 influence on the steady state exposure of regorafenib and its metabolites has not been studied.

798 Inducers of CYP3A4 should be avoided, or selection of an alternate concomitant medicinal product,  
799 with no or minimal potential to induce CYP3A4 should be considered

800 [Appendix F](#) provides an overview of the most commonly used strong CYP3A4 inhibitors and CYP3A4  
801 inducers) that should be avoided during the study.

802 **7.5.2 Permitted Concomitant Therapies**

803 All concomitant medications (including start / stop dates, total daily dose, and indication) must be  
804 recorded in the patient's source documentation and in the eCRF.

805 Patients who are therapeutically treated with low molecular weight heparin or novel oral  
806 anticoagulants (NOACs) such as dabigatran or rivaroxaban will be allowed to participate provided that  
807 no prior evidence of underlying abnormality in coagulation parameters exists.

808 Patients may receive palliative or supportive care for any underlying illness (e.g.: anti-emetics, anti-  
809 diarrheal, IV fluids).

810 Bisphosphonates and/or receptor activator of nuclear factor kappa-B ligand (RANKL) inhibitor therapies  
811 (such as denosumab) for bone metastases may be continued if treatment with an agent from one of  
812 these two classes was initiated prior to signing informed consent. Bisphosphonates and/or RANKL  
813 Bisphosphonates and/or RANKL inhibitor therapies cannot be initiated after informed consent has been  
814 signed, unless in the opinion of the investigator, the patient does not have PD.



815 Hematopoietic colony stimulating growth factors such as granulocyte colony stimulating factor (G-CSF)  
816 and other hematopoietic growth factors may be used during the study in the management of acute  
817 toxicity such as febrile neutropenia when clinically indicated or at the discretion of the Investigator;  
818 however they may not be substituted for a required dose reduction or used prophylactically. Patients  
819 taking chronic erythropoietin are permitted.

820 Participants are permitted the use of topical, ocular, intra-articular, intranasal, and inhalational  
821 corticosteroids (with minimal systemic absorption). Adrenal replacement steroid doses >10 mg daily  
822 prednisone are permitted. A brief (less than 3 weeks) course of corticosteroids for prophylaxis (e.g.,  
823 contrast dye allergy) or for treatment of non-autoimmune conditions (e.g., delayed-type  
824 hypersensitivity reaction caused by a contact allergen) is permitted

825 Radiotherapy:

826 ○ Palliative radiotherapy during the study is allowed for local pain control after  
827 individual benefit-risk assessment provided that:

828                   ▪ In the opinion of the Investigator, the patient does not have PD,

829                   ▪ No more than 25% of the patient's bone marrow is irradiated

830                   ▪ The radiation treatment field may not include a target lesion by RECIST v1.1.

831 ○ Nivolumab and ipilimumab should be withheld for at least 1 week before, during and  
832 1 week after radiation. Participants should be closely monitored for any potential  
833 toxicity during and after receiving radiotherapy, and AE should resolve to Grade ≤1  
834 prior to resuming therapy. Regorafenib may only be continued during palliative  
835 radiotherapy after an individual benefit-risk assessment. The Investigator should  
836 consult the Sponsor.

837 Major surgery for any reason different than symptom management or tumor control should only be  
838 performed during the study period if, in the opinion of the Investigator and after careful individual  
839 benefit/risk assessment (taking into account the potential wound healing complications that have been  
840 described with all anti-VEGF drugs), the surgery will be beneficial for the patient. It is recommended to  
841 stop study treatment two weeks before surgery. The decision to resume study treatment after surgery  
842 should be based on clinical judgment of adequate wound healing. Patients should be placed back on  
843 study therapy within 4 weeks of the scheduled interruption of regorafenib.

844 Patients may receive other medications that the Investigator deems to be medically necessary.

### 845           **7.5.3 Prohibited Prior and Concomitant Therapies**

846 Patients are prohibited from receiving the following therapies during the course of the study:

- 847 • Disease-specific anti-neoplastic therapies, including kinase inhibitors, immunotherapy,  
848 chemotherapy, hormonal therapy, non-palliative radiation therapy or experimental therapies  
849 other than regorafenib ipilimumab and nivolumab are not allowed.
- 850 • Any botanical preparation (e.g., herbal supplements or traditional Chinese medicines) intended  
851 to treat the disease under study or provide supportive care. Use of marijuana and its derivatives  
852 for treatment of symptoms related to cancer or cancer treatment are permitted if obtained by  
853 medical prescription or if its use (even without a medical prescription) has been legalized locally.
- 854 • Surgery for symptom management or tumor control.
- 855 • Concomitant use of strong inhibitors of CYP3A4 and strong inducers of CYP3A4 (listed in Section  
856 [Appendix F](#)) are not permitted for 2 weeks prior to start of study intervention or during the  
857 study.
- 858 • Grapefruit and grapefruit juice (CYP3A4 inhibitor) consumption is not permitted during the  
859 study.
- 860 • Any live/attenuated vaccine (e.g., varicella, zoster, yellow fever, rotavirus, oral polio and  
861 measles, mumps, rubella [MMR]) during treatment and until 100 days post LD of nivolumab.  
862 Seasonal influenza vaccines for injection are generally killed virus vaccines and are allowed;  
863 however intranasal influenza vaccines (e.g., FluMist®) are live attenuated vaccines and are not  
864 allowed.
- 865 • Immunosuppressive agents and immunosuppressive doses of systemic corticosteroids  
866 (Exceptions: (i) Inhaled/topical steroids; (ii) systemic steroids at doses  $\leq 10$  mg/day prednisone/  
867 equivalent, unless medically necessary to address toxicities related to auto-immune disease, or  
868 for other medical conditions that arise where no other suitable alternatives are present)

#### 869 **7.5.4 Documentation of Prior and New Concomitant Therapies**

870 Any medication or vaccine (including over-the-counter or prescription medicines, vitamins, and/or  
871 herbal supplements) that the participant is receiving at the time of enrollment or receives during the  
872 study must be recorded along with:

- 873 • Reason for use
- 874 • Dates of administration including start and end dates
- 875 • Dosage information including dose and frequency

#### 876 **7.5.5 Rescue Medicine**

877 Not applicable for this study intervention.

### 878 **7.6 Dose Modification and Toxicity Management**

879 Based on the known toxicity profiles of regorafenib, nivolumab and ipilimumab, certain AEs are likely to  
880 be associated with one drug versus the other. For example, treatment emergent hypertension and  
881 hand-foot skin reaction (HFSR) are likely to be associated with regorafenib rather than nivolumab and  
882 ipilimumab; similarly, immune-related AEs (irAEs) are likely to be associated with nivolumab and/or  
883 ipilimumab rather than regorafenib. However, some drug-related AEs such as diarrhea, abnormal  
884 thyroid function, and fatigue are overlapping. Therefore, it is important to evaluate each AE to confirm  
885 etiology or exclude other causes in order to determine proper management of the adverse reaction and  
886 action regarding study treatment. A careful decision should be made by Investigators based on all  
887 clinical information, e.g., relatedness to study medications.

888 Dose modifications must be based on the maximum toxicity experienced during a cycle. If appropriate,  
889 the Investigator may attribute each toxicity event to regorafenib or ipilimumab or nivolumab alone or  
890 to the combination. In situations where clear attribution cannot be made to individual drugs, more  
891 conservative dose modification approach should be used for all the drugs. In case of dose

892 modifications, any efforts should be made to restart study intervention as per original schedules for  
 893 regorafenib nivolumab and ipilimumab.

894 **7.6.1 Regorafenib**

895 Section 6.3 outlines different regorafenib dose levels for the purpose of dose modification. In case dose de-  
 896 escalation for regorafenib is necessary, the study intervention will be administered as outlined in Table 7-1  
 897 to Table 7-4.

898 **Table 7-1: Regorafenib Dose Modification/Dose Interruption Guide:**

899 **(except HFSR, Hypertension, and Liver Function Test Abnormalities)**

900

| CTCAE Grade | Occurrences                                    | Dose Interruption                                   | Dose modification (when resuming treatment)                                                       |
|-------------|------------------------------------------------|-----------------------------------------------------|---------------------------------------------------------------------------------------------------|
| Grade 0-2   | Any                                            | No change                                           | No change                                                                                         |
| Grade 3     | 1 <sup>st</sup> and 2 <sup>nd</sup> occurrence | Hold until recovery to <G2 or baseline <sup>a</sup> | Restart at same dose level or reduce 1 dose level (at the investigator's discretion) <sup>b</sup> |
|             | 3 <sup>rd</sup> occurrence                     | Hold until recovery to <G2 or baseline <sup>a</sup> | Reduce 1 dose level or consider permanent discontinuation <sup>b</sup>                            |
| Grade 4     | 1 <sup>st</sup> occurrence                     | Hold until recovery to <G2 or baseline <sup>a</sup> | Reduce 1 dose level or consider permanent discontinuation <sup>b</sup>                            |
|             | 2 <sup>nd</sup> occurrence                     | Hold until recovery to <G2 or baseline <sup>a</sup> | Discontinue                                                                                       |

901  
902  
903  
904  
905  
906  
907  
908  
909  
910

Abbreviations: CTCAE = common terminology criteria for adverse events; G = Grade; HFSR = hand-foot skin reaction  
 a) Excludes: alopecia, non-refractory nausea/vomiting, lymphopenia and asymptomatic laboratory abnormalities. Treatment can be resumed with grade 2 fatigue or hypothyroidism  
 b) If reductions are required resulting in regorafenib daily dose of less than 80 mg every other day, the regorafenib will be permanently discontinued. Subjects requiring a delay of >4 weeks should discontinue regorafenib treatment. However, continuation of regorafenib may be considered if, in the investigator's opinion, the patient may continue to benefit from the regorafenib treatment, and after consultation with the PI. Transient G3 skin rash toxicities that recover within 1 week to Grade 1 or less do not require dose reduction in regorafenib.

911 **Table 7-2: Regorafenib Dose Modification Guidance: HFSR/ Palmar-Plantar Erythrodysesthesia Syndrome**

912

| Skin toxicity grade (CTCAE) Specific to HFSR | Occurrence                                              | Dose Interruption                                                                                                 | Dose modification (when resuming treatment)                                                           |
|----------------------------------------------|---------------------------------------------------------|-------------------------------------------------------------------------------------------------------------------|-------------------------------------------------------------------------------------------------------|
| G1                                           | Any                                                     | Maintain dose level and institute supportive measures immediately for symptomatic relief                          | No Change                                                                                             |
| G2                                           | 1 <sup>st</sup> occurrence                              | Interrupt therapy for a minimum of 7 days, until toxicity resolves to Grade 0-1                                   | Institute supportive measures and continue same dose or consider decrease by 1 dose level             |
|                                              | No improvement within 7 d or 2 <sup>nd</sup> occurrence | Interrupt until toxicity resolves or improves to G1.                                                              | When resuming treatment, treat at reduced dose level or consider discontinuation <sup>a</sup>         |
|                                              | 3 <sup>rd</sup> occurrence                              | Discontinue                                                                                                       |                                                                                                       |
| G3                                           | 1 <sup>st</sup> occurrence                              | Institute supportive measures immediately. Interrupt therapy for ≥ 7 d until toxicity resolves or improves to G1. | When resuming treatment, decrease by 1 dose level                                                     |
|                                              | 2 <sup>nd</sup> occurrence                              | Institute supportive measures immediately. Interrupt therapy for ≥ 7 d until toxicity resolves or improves to G1. | When resuming treatment, decrease by 1 additional dose level or consider discontinuation <sup>a</sup> |
|                                              | 3 <sup>rd</sup> occurrence                              | Discontinue                                                                                                       |                                                                                                       |

913  
914

Abbreviations: CTCAE = common terminology criteria for adverse events; G = Grade; HFSR = hand-foot skin reaction  
 a) If reductions are required resulting in regorafenib daily dose of less than 40 mg every day, the regorafenib will be

915 permanently discontinued. If toxicity returns to Grade 0-1 after dose reduction, dose reescalation is permitted in the  
 916 subsequent cycle at the Investigator's discretion. Subjects requiring a delay of >4 weeks should discontinue  
 917 regorafenib treatment. However, continuation of regorafenib may be considered if, in the investigator's opinion, the  
 918 patient may continue to benefit from the regorafenib treatment, and after consultation with study PI.  
 919

920 **Table 7-3: Regorafenib Dose Modification Guidance, Non-Immune Toxicities: Hypertension**  
 921

| CTCAE Grade                              | Suggested regorafenib dose interruption                                                                                             | Suggested regorafenib dose modification                            |
|------------------------------------------|-------------------------------------------------------------------------------------------------------------------------------------|--------------------------------------------------------------------|
| <b>Specific guidance for HYPERTESION</b> |                                                                                                                                     |                                                                    |
| G1                                       | No change.                                                                                                                          | Consider increased BP monitoring                                   |
| G2                                       | If symptomatic, hold until symptoms resolve AND diastolic BP ≤ 90 mmHg. Treat with anti-hypertensive medications                    | At restart, continue at the same dose level                        |
| G3                                       | Hold until diastolic BP ≤ 90 mm Hg, and if symptomatic, until symptoms resolve. Treat with additional anti-hypertensive medications | At restart, continue at the same dose level.                       |
|                                          | If BP is not controlled with the addition of new or more intensive therapy.                                                         | Reduce by 1 dose level                                             |
|                                          | If G3 hypertension recurs despite dose reduction and optimal antihypertensive therapy                                               | Reduce another dose level or consider discontinuation <sup>a</sup> |
| G4                                       | Discontinue                                                                                                                         |                                                                    |

922 Abbreviations: BP = blood pressure; CTCAE = common terminology criteria for adverse events; G = Grade; Hg = mercury  
 923 a) If reductions are required resulting in regorafenib daily dose of less than 40 mg every day, the regorafenib will be  
 924 permanently discontinued. If toxicity returns to Grade 0-1 after dose reduction, dose reescalation is permitted in the  
 925 subsequent cycle at the investigator's discretion. Subjects requiring a delay of >4 weeks should discontinue  
 926 regorafenib treatment. However, continuation of regorafenib may be considered if, in the investigator's opinion, the  
 927 patient may continue to benefit from the regorafenib treatment, and after consultation with the Study PI.

928  
929

**Table 7-4: Regorafenib Dose Modifications for Liver Function Test Abnormalities<sup>a</sup>**

| <b>Increases in AST/ALT/Bilirubin<sup>a,b</sup></b>                                                                                                        | <b>Occurrence</b>          | <b>Dose Interruption</b>                                  | <b>Dose Modification (when resuming treatment)</b>                                                                   |
|------------------------------------------------------------------------------------------------------------------------------------------------------------|----------------------------|-----------------------------------------------------------|----------------------------------------------------------------------------------------------------------------------|
| <b>(from baseline within normal limits)</b><br>AST and/or ALT < 3 times ULN or total bilirubin < 1.5 times ULN                                             | Any                        | <b>Continue dosing</b>                                    | No Change                                                                                                            |
| <b>(from baseline AST/ALT more than 1 and up to 3 times ULN)</b><br>AST or ALT more than 3 and up to 5 times the ULN                                       | Any                        | <b>Continue dosing</b>                                    | No Change                                                                                                            |
| <b>(from baseline within normal limits)</b><br>AST or ALT more than 3 and up to 5 times the ULN or total bilirubin more than 1.5 and up to 3 times the ULN | 1 <sup>st</sup> occurrence | <b>Delay dosing until return to Grade ≤ 1 or baseline</b> | Reduce 1 dose level <sup>c</sup>                                                                                     |
|                                                                                                                                                            | Re-occurrence              | <b>Discontinue</b>                                        |                                                                                                                      |
| <b>(from baseline any grade)</b><br>AST or ALT more than 5 times the ULN or total bilirubin more than 3 times the ULN                                      | 1 <sup>st</sup> occurrence | <b>Delay dosing until return to Grade ≤ 1 or baseline</b> | If the potential to reinitiate regorafenib is considered to outweigh the risk of hepatotoxicity: reduce 1 dose level |
|                                                                                                                                                            | Re-occurrence              | <b>Discontinue</b>                                        |                                                                                                                      |
| <b>(from baseline any grade)</b><br>AST and/or ALT > 20 x ULN                                                                                              | Any                        | <b>Discontinue</b>                                        |                                                                                                                      |
| AST and/or ALT > 3 x ULN with concurrent bilirubin > 2 x ULN                                                                                               | Any                        | <b>Discontinue<sup>c</sup></b>                            |                                                                                                                      |

930  
931  
932  
933  
934  
935  
936  
937  
938  
939

Abbreviations: ALT=alanineaminotransferase; AST=aspartateaminotransferase; ULN=upperlimitofnormal

- a) In the event hepatic toxicity is attributed to the immunotherapy, and not to regorafenib, and resolves with steroids, regorafenib may be resumed at the dose level prior to hepatic toxicity.
- b) For any of the events listed above (dose interruption or modification): monitor liver function tests weekly or more frequently until recovery to baseline or stabilization
- c) If all values remain stable for 2 full cycles, dose re-escalation may be considered at the discretion of the Investigator. After re-escalation AST, ALT, bilirubin should be checked 2x/week for 2 weeks, followed by weekly assessments for at least 4weeks.  
Exception: participants with Gilbert's syndrome who develop elevated transaminases should be managed as per the above outlined recommendations for the respective observed elevation of ALT and/or AST.

940  
941  
942  
943  
944

The dose modification can occur independently for the 3 drugs used if toxicity can be clearly attributed to one of the drugs. Resumption of regorafenib dosing is not required to receive further nivolumab and ipilimumab dosing and vice versa. Treatment with individual drugs (regorafenib or ipilimumab or nivolumab) may continue on schedule even if other drug is interrupted or permanently discontinued due to toxicity.

945 **7.6.2 Nivolumab**

946 There will be no dose reductions for nivolumab. If the criteria to resume treatment are met, the subject  
 947 should restart treatment at the next scheduled time point per protocol. There are no recommended  
 948 dose modifications for hypothyroidism or hyperthyroidism. Interrupt or slow the rate of infusion in  
 949 patients with mild or moderate infusion-related reactions.

950 **Table 7-5: Recommended Dose Modifications for nivolumab**

951

| <b>Adverse Reaction</b>        | <b>Severity*</b>                                                                                                                                                                                                                                                                                                                                                                                                  | <b>Dose Modification</b>                                                                                                |
|--------------------------------|-------------------------------------------------------------------------------------------------------------------------------------------------------------------------------------------------------------------------------------------------------------------------------------------------------------------------------------------------------------------------------------------------------------------|-------------------------------------------------------------------------------------------------------------------------|
| Colitis                        | Grade 2 diarrhea or colitis                                                                                                                                                                                                                                                                                                                                                                                       | Withhold dose <sup>a</sup>                                                                                              |
|                                | Grade 3 diarrhea or colitis                                                                                                                                                                                                                                                                                                                                                                                       | Withhold dose <sup>a</sup> in the case of diarrhea without suspected colitis. Discontinue in the setting of G3 colitis. |
|                                | Grade 4 diarrhea or colitis                                                                                                                                                                                                                                                                                                                                                                                       | Permanently discontinue                                                                                                 |
| Pneumonitis                    | Grade 2 pneumonitis                                                                                                                                                                                                                                                                                                                                                                                               | Withhold dose <sup>a</sup>                                                                                              |
|                                | Grade 3 or 4 pneumonitis                                                                                                                                                                                                                                                                                                                                                                                          | Permanently discontinue                                                                                                 |
| Hepatitis/non-HCC <sup>b</sup> | Aspartate aminotransferase (AST) or alanine aminotransferase (ALT) more than 3 and up to 5 times the upper limit of normal (ULN) or total bilirubin more than 1.5 and up to 3 times the ULN                                                                                                                                                                                                                       | Withhold dose <sup>a</sup>                                                                                              |
|                                | AST or ALT more than 5 times the ULN or total bilirubin more than 3 times the ULN                                                                                                                                                                                                                                                                                                                                 | Permanently discontinue                                                                                                 |
| Hepatitis/ HCC <sup>b</sup>    | <ul style="list-style-type: none"> <li>If AST/ALT is within normal limits at baseline and increases to more than 3 and up to 5 times the ULN</li> <li>If AST/ALT is more than 1 and up to 3 times ULN at baseline and increases to more than 5 and up to 10 times the ULN</li> <li>If AST/ALT is more than 3 and up to 5 times ULN at baseline and increases to more than 8 and up to 10 times the ULN</li> </ul> | Withhold dose <sup>c</sup>                                                                                              |
|                                | If AST or ALT increases to more than 10 times the ULN or total bilirubin increases to more than 3 times the ULN                                                                                                                                                                                                                                                                                                   | Permanently discontinue                                                                                                 |
|                                |                                                                                                                                                                                                                                                                                                                                                                                                                   |                                                                                                                         |
| Hypophysitis                   | Grade 2 or 3 hypophysitis                                                                                                                                                                                                                                                                                                                                                                                         | Withhold dose <sup>a</sup>                                                                                              |
|                                | Grade 4 hypophysitis                                                                                                                                                                                                                                                                                                                                                                                              | Permanently discontinue                                                                                                 |
| Adrenal Insufficiency          | Grade 2 adrenal insufficiency                                                                                                                                                                                                                                                                                                                                                                                     | Withhold dose <sup>a</sup>                                                                                              |
|                                | Grade 3 or 4 adrenal insufficiency                                                                                                                                                                                                                                                                                                                                                                                | Permanently discontinue                                                                                                 |

952

953 **Table 7-5: Recommended Dose Modifications for nivolumab**

| Adverse Reaction                                                     | Severity*                                                                                    | Dose Modification                    |
|----------------------------------------------------------------------|----------------------------------------------------------------------------------------------|--------------------------------------|
| Type 1 Diabetes Mellitus                                             | Grade 3 hyperglycemia                                                                        | Withhold dose                        |
|                                                                      | Grade 4 hyperglycemia                                                                        | Permanently discontinue <sup>d</sup> |
| Nephritis and Renal Dysfunction                                      | Serum creatinine more than 1.5 and up to 6 times the ULN                                     | Withhold dose <sup>a</sup>           |
|                                                                      | Serum creatinine more than 6 times the ULN                                                   | Permanently discontinue <sup>d</sup> |
| Skin                                                                 | Grade 3 rash or suspected Stevens-Johnson syndrome (SJS) or toxic epidermal necrolysis (TEN) | Withhold dose <sup>a</sup>           |
|                                                                      | Grade 4 rash or confirmed SJS or TEN                                                         | Permanently discontinue <sup>d</sup> |
| Encephalitis                                                         | New-onset moderate or severe neurologic signs or symptoms                                    | Withhold dose <sup>a</sup>           |
|                                                                      | Immune-mediated encephalitis                                                                 | Permanently discontinue              |
| Other                                                                | Other Grade 3 adverse reaction                                                               |                                      |
|                                                                      | First occurrence                                                                             | Withhold dose <sup>a</sup>           |
|                                                                      | Recurrence of same Grade 3 adverse reactions                                                 | Permanently discontinue <sup>d</sup> |
|                                                                      | Life-threatening or Grade 4 adverse reaction                                                 | Permanently discontinue <sup>d</sup> |
|                                                                      | Grade 3 myocarditis                                                                          | Permanently discontinue <sup>d</sup> |
|                                                                      | Requirement for 10 mg per day or greater prednisone or equivalent for more than 12 weeks     | Permanently discontinue <sup>d</sup> |
| Persistent Grade 2 or 3 adverse reactions lasting 12 weeks or longer | Permanently discontinue <sup>d</sup>                                                         |                                      |

954 \*Toxicity was graded per National Cancer Institute Common Terminology Criteria for Adverse Events.  
 955 Version 5.0 (NCI CTCAE V5)

956 <sup>a</sup> Resume treatment when adverse reaction improves to Grade 0 or 1.

957 <sup>b</sup> HCC: hepatocellular carcinoma.

958 <sup>c</sup> Resume treatment when AST/ALT returns to baseline.

959 <sup>d</sup> In the event patients develop severe immunotherapy related toxicities that lead to nivolumab and  
 960 ipilimumab withholding and in a setting where the patient is clearly deriving clinical benefit and has no  
 961 other viable treatment options, the patient may be restarted on nivolumab only (without ipilimumab) after  
 962 discussion with the Principal Investigator and only if the immune toxicities have resolved to G1 or less. In  
 963 that setting, resumption of ipilimumab will not be allowed.

964 **7.6.3 Ipilimumab**

965 When ipilimumab is administered in combination with nivolumab, if ipilimumab is withheld, nivolumab  
 966 should also be withheld. Interrupt or slow the rate of infusion in patients with mild or moderate infusion  
 967 reactions. Discontinue in patients with severe or life-threatening infusion reactions.

968

969

970

971  
 972  
 973  
 974  
 975  
 976

**Table 7-6: Recommended Dose Modifications for Ipilimumab**

| Target/Organ System    | Adverse Reaction (CTCAE v5)                                                                                                                                                                                           | Treatment Modification                                                                                                                                                                                |
|------------------------|-----------------------------------------------------------------------------------------------------------------------------------------------------------------------------------------------------------------------|-------------------------------------------------------------------------------------------------------------------------------------------------------------------------------------------------------|
| Endocrine              | Symptomatic endocrinopathy                                                                                                                                                                                            | Withhold ipilimumab<br>Resume ipilimumab in patients with complete or partial resolution of adverse reactions (Grade 0 to 1) and who are receiving less than 7.5 mg prednisone or equivalent per day. |
|                        | <ul style="list-style-type: none"> <li>• Symptomatic reactions lasting 6 weeks or longer</li> <li>• Inability to reduce corticosteroid dose to 7.5 mg prednisone or equivalent per day</li> </ul>                     | Permanently discontinue ipilimumab                                                                                                                                                                    |
| Ophthalmologic         | Grade 2 through 4 reactions <ul style="list-style-type: none"> <li>• not improving to Grade 1 within 2 weeks while receiving topical therapy or</li> <li>• requiring systemic treatment</li> </ul>                    | Permanently discontinue ipilimumab                                                                                                                                                                    |
| All Other <sup>a</sup> | Grade 2                                                                                                                                                                                                               | Withhold ipilimumab<br>Resume ipilimumab in patients with complete or partial resolution of adverse reactions (Grade 0 to 1) and who are receiving less than 7.5 mg prednisone or equivalent per day. |
|                        | <ul style="list-style-type: none"> <li>• Grade 2 reactions lasting 6 weeks or longer</li> <li>• Inability to reduce corticosteroid dose to 7.5 mg prednisone or equivalent per day</li> <li>• Grade 3 or 4</li> </ul> | Permanently discontinue ipilimumab                                                                                                                                                                    |

977 <sup>a</sup>Does not apply to grade 3 skin toxicities which will be managed in a similar fashion as dictated in the  
 978 nivolumab dose modification table

979 **7.6.4 Management of Immune-Mediated AEs**

980 Immune-related AEs (irAEs) may occur shortly after the first dose or several months after the last dose  
 981 of nivolumab and/or ipilimumab treatment and may affect more than one body system simultaneously.  
 982 Therefore, early recognition and initiation of treatment is critical to reduce complications. Based on  
 983 existing clinical study data, most irAEs were reversible and could be managed with interruptions of I-O  
 984 reagents, administration of corticosteroids and/or other supportive care. To ensure early recognition  
 985 and prompt intervention, management algorithms have been developed for suspected pulmonary  
 986 toxicity, GI toxicity, hepatotoxicity, endocrinopathy, skin toxicity, neurological toxicity, and renal toxicity.  
 987 These adverse event management algorithms are included in [Appendix H](#).



988 These general guidelines constitute guidance to the Investigator. A general principle is that differential  
989 diagnoses should be diligently evaluated according to standard medical practice. Non-inflammatory  
990 etiologies should be considered and appropriately treated. Corticosteroids are a primary therapy for  
991 immune related adverse events. The oral equivalent of the recommended IV doses may be considered  
992 for ambulatory patients with low-grade toxicity. The lower bioavailability of oral corticosteroids should  
993 be taken into account when switching to the equivalent dose of oral corticosteroids. Consultation with a  
994 medical or surgical specialist, especially prior to an invasive diagnostic or therapeutic procedure, is  
995 recommended.

#### 996 **7.6.5 Treatment of Nivolumab and or Ipilimumab Related Infusion Reactions**

997 All Grade 3 or 4 infusion reactions should be reported within 24 hours to the Sponsor and reported as an  
998 SAE if it meets the criteria. Infusion reactions should be graded according to NCI CTCAE, v5.0 guidelines.  
999 Treatment recommendations are provided below and may be modified based on local treatment  
1000 standards and guidelines, as appropriate:

1001 For Grade 1 symptoms:

- 1002 • Remain at bedside and monitor participant until recovery from symptoms. The following  
1003 prophylactic premedications are recommended for future infusions: diphenhydramine 50 mg (or  
1004 equivalent) and/or acetaminophen/paracetamol 325 to 1000 mg at least 30 minutes before  
1005 additional nivolumab and/or ipilimumab administrations.

1006 For Grade 2 symptoms:

- 1007 • Stop the study drug infusion, begin an IV infusion of normal saline, and treat the participant with  
1008 diphenhydramine 25-50 mg IV (or equivalent) and/or acetaminophen/paracetamol 325 to 1000  
1009 mg; remain at bedside and monitor participant until resolution of symptoms. Corticosteroid  
1010 and/or bronchodilator therapy may also be administered as appropriate. If the infusion is  
1011 interrupted, then restart the infusion at 50% of the original infusion rate when symptoms  
1012 resolve; if no further complications ensue after 30 minutes, the rate may be increased to 100%  
1013 of the original infusion rate. Monitor participant closely. If symptoms recur, then no further  
1014 study medication will be administered at that visit.
- 1015 • For future infusions, the following prophylactic premedications are recommended:  
1016 Diphenhydramine 25-50 mg (or equivalent) and/or acetaminophen/paracetamol 325 to 1000  
1017 mg should be administered at least 30 minutes before nivolumab and/or ipilimumab infusions. If  
1018 necessary, corticosteroids (up to 25 mg of hydrocortisone or equivalent) may be used.

1019 For Grade 3 or 4 symptoms:

- 1020 • Immediately discontinue infusion of study drug. Begin an IV infusion of normal saline and treat  
1021 the participant as follows: Recommend bronchodilators, epinephrine 0.2 to 1 mg of a 1:1000  
1022 solution for subcutaneous administration or 0.1 to 0.25 mg of a 1:10,000 solution injected  
1023 slowly for IV administration, and/or diphenhydramine 50 mg IV with methylprednisolone 100  
1024 mg IV (or equivalent), as needed. Participant should be monitored until the Investigator is  
1025 comfortable that the symptoms will not recur. Study drug will be permanently discontinued.  
1026 Investigators should follow their institutional guidelines for the treatment of anaphylaxis.  
1027 Remain at bedside and monitor participant until recovery of the symptoms.

1028 In case of late-occurring hypersensitivity symptoms (e.g., appearance of a localized or generalized  
1029 pruritus within 1 week after treatment), symptomatic treatment may be given (e.g., oral antihistamine  
1030 or corticosteroids).

1031 Additional details on the immune mediated AEs of nivolumab and/or ipilimumab, including results from  
1032 other clinical studies, are also available in the nivolumab and ipilimumab IB.

1033 **7.7 Intervention after the End of the Study**

1034 At the EOS intervention for each individual participant, further therapeutic options with drugs other  
1035 than regorafenib and/or nivolumab are at the discretion of the Investigator.

1036

1037

1038

1039

1040

1041

1042

1043

1044

1045

1046

1047

1048

1049

1050

1051

1052

1053

1054

1055 **8.0 AGENT INFORMATION**

---

1056 **8.1 Nivolumab**

1057 Nivolumab is FDA approved for

- 1058 • patients with unresectable or metastatic melanoma, as a single agent or in combination with  
1059 ipilimumab.
- 1060 • patients with melanoma with lymph node involvement or metastatic disease who have  
1061 undergone complete resection, in the adjuvant setting.
- 1062 • patients with metastatic non-small cell lung cancer and progression on or after platinum-based  
1063 chemotherapy. Patients with EGFR or ALK genomic tumor aberrations should have disease  
1064 progression on FDA-approved therapy for these aberrations prior to receiving OPDIVO.
- 1065 • patients with metastatic small cell lung cancer with progression after platinum-based  
1066 chemotherapy and at least one other line of therapy.
- 1067 • patients with advanced renal cell carcinoma who have received prior antiangiogenic therapy.
- 1068 • patients with intermediate or poor risk, previously untreated advanced renal cell carcinoma, in  
1069 combination with ipilimumab.
- 1070 • adult patients with classical Hodgkin lymphoma that has relapsed or progressed after:
  - 1071 ○ autologous hematopoietic stem cell transplantation (HSCT) and brentuximab vedotin, or
  - 1072 ○ 3 or more lines of systemic therapy that includes autologous HSCT.
- 1073 • patients with recurrent or metastatic squamous cell carcinoma of the head and neck with  
1074 disease progression on or after a platinum-based therapy.
- 1075 • patients with locally advanced or metastatic urothelial carcinoma who:
  - 1076 ○ have disease progression during or following platinum-containing chemotherapy
  - 1077 ○ have disease progression within 12 months of neoadjuvant or adjuvant treatment with  
1078 platinum-containing chemotherapy.
  - 1079 ○ adult and pediatric (12 years and older) patients with microsatellite instability-high  
1080 (MSI-H) or mismatch repair deficient (dMMR) metastatic colorectal cancer that has  
1081 progressed following treatment with a fluoropyrimidine, oxaliplatin, and irinotecan, as a  
1082 single agent or in combination with ipilimumab
  - 1083 ○ patients with hepatocellular carcinoma who have been previously treated with  
1084 sorafenib.

1085 Please refer to the IB for a detailed description.

1086 **8.1.1 Other Names**

1087 OPDIVO

1088 **8.1.2 Description and Molecular Weight**

|                          |                        |
|--------------------------|------------------------|
| <i>Type</i>              | IgG4 kappa monoclonal  |
| <i>Source:</i>           | Humanized (from mouse) |
| <i>Target:</i>           | PD-1 receptor          |
| <i>Molecular weight:</i> | 146kDa                 |

1089 **8.1.3 Mechanism of Action**

1090 Binding of the PD-1 ligands, PD-L1 and PD-L2, to the PD-1 receptor found on T cells, inhibits T-cell  
1091 proliferation and cytokine production. Upregulation of PD-1 ligands occurs in some tumors and signaling

1092 through this pathway can contribute to inhibition of active T-cell immune surveillance of tumors.  
1093 Nivolumab is a human immunoglobulin G4 (IgG4) monoclonal antibody that binds to the PD-1 receptor  
1094 and blocks its interaction with PD-L1 and PD-L2, releasing PD-1 pathway-mediated inhibition of the  
1095 immune response, including the anti-tumor immune response. In syngeneic mouse tumor models,  
1096 blocking PD-1 activity resulted in decreased tumor growth.

1097 **8.1.4 Pharmacokinetics**

*Half-life elimination:* 25 days

1098 **8.1.5 Formulation**

1099 Nivolumab is a sterile, preservative-free, non-pyrogenic, clear to opalescent, colorless to pale-yellow  
1100 liquid that may contain light (few) particles. Nivolumab injection for intravenous infusion is supplied in  
1101 single-dose vials. Each mL of nivolumab solution contains nivolumab 10 mg, mannitol (30 mg), pentetic  
1102 acid (0.008 mg), polysorbate 80 (0.2 mg), sodium chloride (2.92 mg), sodium citrate dihydrate (5.88 mg),  
1103 and Water for Injection, USP. May contain hydrochloric acid and/or sodium hydroxide to adjust pH to 6.

1104 **8.1.6 Storage and Stability**

1105 The product does not contain a preservative. Store in a refrigerator (2°C to 8°C).

1106 Store in the original package in order to protect from light.

1107 The unopened vial can be stored at controlled room temperature up to 25°C with room light for up to 48  
1108 hours.

1109 After preparation, store the nivolumab infusion either:

- 1110 • at room temperature for no more than 8 hours from the time of preparation. This includes room  
1111 temperature storage of the infusion in the IV container and time for administration of the  
1112 infusion or
- 1113 • under refrigeration at 2°C to 8°C (36°F to 46°F) for no more than 24 hours from the time of  
1114 infusion preparation.

1115 **Do not freeze.**

1116 **8.1.7 Handling**

1117 Qualified personnel, familiar with procedures that minimize undue exposure to themselves and the  
1118 environment, should undertake the preparation, handling, and safe disposal of the agent.

1119 Clinical supplies may not be used for any purpose other than that stated in the protocol.

1120 **8.1.8 Dose Calculation**

1121 240 mg fixed dose= 3 vials (100 mg/10 ml) will be used to prepare the 240mg dose

1122 **8.1.9 Preparation**

- 1123 • Visually inspect drug product solution for particulate matter and discoloration prior to  
1124 administration. Nivolumab is a clear to opalescent, colorless to pale-yellow solution. Discard the  
1125 vial if the solution is cloudy, discolored, or contains extraneous particulate matter other than a  
1126 few translucent-to-white, proteinaceous particles. Do not shake the vial.

- 1127       • Withdraw the required volume of nivolumab and transfer into an intravenous container.
- 1128       • Dilute nivolumab with either 0.9% Sodium Chloride Injection, USP or 5% Dextrose Injection, USP  
1129       to prepare an infusion with a final concentration ranging from 1 mg/mL to 10 mg/mL. The total  
1130       volume of infusion must not exceed 160 mL.
- 1131       • For adult and pediatric patients with body weights less than 40 kg, the total volume of infusion  
1132       must not exceed 4 mL/kg of body weight.
- 1133       • Mix diluted solution by gentle inversion. Do not shake.
- 1134       • Discard partially used vials or empty vials of nivolumab

1135       **8.1.10 Administration**

1136       See [Section 7.1](#).

1137       **8.1.11 Supplier**

1138       The agent will be supplied free of charge by BMS.

1139       **8.1.12 Accountability**

1140       The investigator, or a responsible party designated by the investigator, must maintain a careful record of  
1141       the inventory and disposition of the agent (investigational or free of charge) using a drug accountability  
1142       log.

1143       **8.1.13 Destruction and Return**

1144       The investigator is responsible for keeping accurate records of the clinical supplies received from BMS or  
1145       designee, the amount dispensed to participants, and the amount remaining at the conclusion of the  
1146       trial.

1147       Any unused agent at the end of the study, expired agent, and damaged agent will be destroyed  
1148       according to applicable federal, state, local and institutional guidelines and procedures. **Prior** to the  
1149       destruction, the DCC should be notified and an acknowledgement to proceed from the DCC should be  
1150       received. Destruction will be documented in a drug accountability log.

1151       **8.2 Ipilimumab**

1152       Ipilimumab is FDA approved for

- 1153       • Treatment of unresectable or metastatic melanoma in adults and pediatric patients (12 years  
1154       and older)
- 1155       • Adjuvant treatment of patients with cutaneous melanoma with pathologic involvement of  
1156       regional lymph nodes of more than 1 mm who have undergone complete resection, including  
1157       total lymphadenectomy.
- 1158       • Treatment of patients with intermediate or poor risk, previously untreated advanced renal cell  
1159       carcinoma, in combination with nivolumab.

1160       Please refer to the IB for a detailed description.

1161       **8.2.1 Other Names**

1162 YERVOY

1163 **8.2.2** Description and Molecular Weight

*Type* IgG1 kappa monoclonal

*Source:* Humanized (from mouse)

*Target:* CTLA-4

*Molecular weight:* 148kDa

1164 **8.2.3** Mechanism of Action

1165 CTLA-4 is a negative regulator of T-cell activity. Ipilimumab is a monoclonal antibody that binds to CTLA-  
1166 4 and blocks the interaction of CTLA-4 with its ligands, CD80/CD86. Blockade of CTLA-4 has been shown  
1167 to augment T-cell activation and proliferation, including the activation and proliferation of tumor  
1168 infiltrating T-effector cells. Inhibition of CTLA-4 signaling can also reduce T-regulatory cell function,  
1169 which may contribute to a general increase in T cell responsiveness, including the anti-tumor immune  
1170 response.

1171 **8.2.4** Pharmacokinetics

*Half-life elimination:* 15.4 days

1172 **8.2.5** Formulation

1173 Ipilimumab is a sterile, preservative-free, clear to slightly opalescent, colorless to pale-yellow solution  
1174 for intravenous infusion, which may contain a small amount of visible translucent-to white, amorphous  
1175 ipilimumab particulates. It is supplied in single-use vials of 200 mg/40 mL. Each milliliter contains 5 mg of  
1176 ipilimumab and the following inactive ingredients: diethylenetriaminepentaacetic acid (DTPA) (0.04 mg),  
1177 mannitol (10 mg), polysorbate 80 (vegetable origin) (0.1 mg), sodium chloride (5.85 mg), tris  
1178 hydrochloride (3.15 mg), and Water for Injection, USP at a pH of 7.

1179 **8.2.6** Storage and Stability

- 1180 • Store ipilimumab under refrigeration at 2°C to 8°C (36°F to 46°F).
- 1181 • Protect ipilimumab from light by storing in the original carton until time of use.
- 1182 • Do not freeze or shake.

1183 **8.2.7** Handling

1184 Qualified personnel, familiar with procedures that minimize undue exposure to themselves and the  
1185 environment, should undertake the preparation, handling, and safe disposal of the agent.

1186 Clinical supplies may not be used for any purpose other than that stated in the protocol.

1187 **8.2.8** Dose Calculation

1188 **8.2.9** Ipilimumab Injection is available via 200mg/40 ml single use vial.

1189 **8.2.10** Preparation

- 1190 • Do not shake product.

- 1191 • Inspect parenteral drug products visually for particulate matter and discoloration prior to  
1192 administration. Discard vial if solution is cloudy, there is pronounced discoloration (solution may  
1193 have pale-yellow color), or there is foreign particulate matter other than translucent-to white,  
1194 amorphous particles.

1195 **Preparation of Solution**

- 1196 • Allow the vials to stand at room temperature for approximately 5 minutes prior to preparation  
1197 of infusion.
- 1198 • Withdraw the required volume of ipilimumab and transfer into an intravenous bag.
- 1199 • Dilute with 0.9% Sodium Chloride Injection, USP or 5% Dextrose Injection, USP to prepare a  
1200 diluted solution with a final concentration ranging from 1 mg/mL to 2 mg/mL. Mix diluted  
1201 solution by gentle inversion.
- 1202 • Store the diluted solution for no more than 24 hours under refrigeration (2°C to 8°C, 36°F to  
1203 46°F) or at room temperature (20°C to 25°C, 68°F to 77°F).
- 1204 • Discard partially used vials or empty vials of YERVOY.

1205 **8.2.11 Administration**

1206 See [Section 7.1](#).

1207 **8.2.12 Supplier**

1208 The agent will be supplied free of charge by BMS.

1209 **8.2.13 Accountability**

1210 The investigator, or a responsible party designated by the investigator, must maintain a careful record of  
1211 the inventory and disposition of the agent (investigational or free of charge) using a drug accountability  
1212 log.

1213 **8.2.14 Destruction and Return**

1214 The investigator is responsible for keeping accurate records of the clinical supplies received from BMS or  
1215 designee, the amount dispensed to participants, and the amount remaining at the conclusion of the  
1216 trial.

1217 Any unused agent at the end of the study, expired agent, and damaged agent will be destroyed  
1218 according to applicable federal, state, local and institutional guidelines and procedures. **Prior** to the  
1219 destruction, the DCC should be notified and an acknowledgement to proceed from the DCC should be  
1220 received. Destruction will be documented in a drug accountability log.

1221 **8.3 Regorafenib**

1222 Regorafenib is FDA approved for

- 1223 • Patients with metastatic colorectal cancer (CRC) who have been previously treated with  
1224 fluoropyrimidine-, oxaliplatin- and irinotecan-based chemotherapy, an anti-VEGF therapy, and, if  
1225 RAS wild- type, an anti-EGFR therapy
- 1226 • Patients with locally advanced, unresectable or metastatic gastrointestinal stromal tumor (GIST)  
1227 who have been previously treated with imatinib mesylate and sunitinib malate
- 1228 • Patients with hepatocellular carcinoma (HCC) who have been previously treated with sorafenib

1229 Please refer to the IB for a detailed description.

1230 **8.3.1** Other Names

1231 STIVARGA

1232 **8.3.2** Description and Molecular Weight

*Structural formula:*

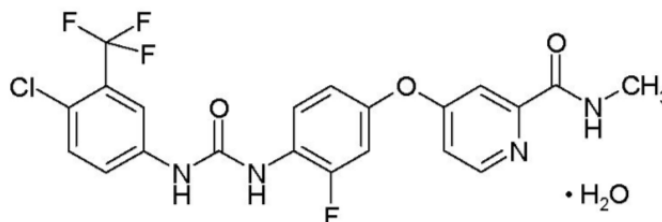

*Empirical formula:* C<sub>21</sub>H<sub>15</sub>ClF<sub>4</sub>N<sub>4</sub>O<sub>3</sub> • H<sub>2</sub>O

*Molecular weight:* 500.83

*Chemical Name:* 4-[4-({[4-chloro-3-(trifluoromethyl) phenyl] carbamoyl} amino)-3-fluorophenoxy]-N-methylpyridine-2-carboxamide monohydrate

1233 **8.3.3** Mechanism of Action

1234 Regorafenib is a small molecule inhibitor of multiple membrane-bound and intracellular kinases involved  
1235 in normal cellular functions and in pathologic processes such as oncogenesis, tumor angiogenesis,  
1236 metastasis and tumor immunity. In in vitro biochemical or cellular assays, regorafenib or its major  
1237 human active metabolites M-2 and M-5 inhibited the activity of RET, VEGFR1, VEGFR2, VEGFR3, KIT,  
1238 PDGFR-alpha, PDGFR-beta, FGFR1, FGFR2, TIE2, DDR2, TrkA, Eph2A, RAF-1, BRAF, BRAF V600E, SAPK2,  
1239 PTK5, Abl and CSF1R at concentrations of regorafenib that have been achieved clinically. In in vivo  
1240 models, regorafenib demonstrated anti-angiogenic activity in a rat tumor model and inhibition of tumor  
1241 growth in several mouse xenograft models including some for human colorectal carcinoma,  
1242 gastrointestinal stromal and hepatocellular carcinoma. Regorafenib also demonstrated anti-metastatic  
1243 activity in a mouse xenograft model and two mouse orthotopic models of human colorectal carcinoma.

1244 **8.3.4** Pharmacokinetics

1245 Following a single 160 mg oral dose of STIVARGA, the geometric mean (minimum to maximum)  
1246 elimination half-lives for regorafenib and the M-2 metabolite in plasma are 28 hours (14 to 58 hours)  
1247 and 25 hours (14 to 32 hours), respectively. M-5 has a longer mean (minimum to maximum) elimination  
1248 half-life of 51 hours (32 to 70 hours).

1249 **8.3.5** Formulation

1250 Regorafenib tablet formulation will be used for this study.

1251 **8.3.6** Storage and Stability

1252 Patients will be instructed to keep their pills at room temperature between 15 to 30°C (59 to 86°F).

1253 Store tablets in the original bottle and do not remove the desiccant. Keep the bottle tightly closed after  
1254 first opening.



1255 **8.3.7** Handling

1256 Qualified personnel, familiar with procedures that minimize undue exposure to themselves and the  
1257 environment, should undertake the preparation, handling, and safe disposal of the unused agent.

1258 **8.3.8** Administration

1259 See [Section 7.1](#).

1260 **8.3.9** Supplier

1261 The agent will be obtained as a standard of care prescription and will be obtained through a specialty  
1262 pharmacy as is the standard approach at City of Hope.

1263 **8.3.10** Accountability

1264 The investigator, or a responsible party designated by the investigator, must maintain a careful record of  
1265 patient compliance using a drug intake log.

1266 **8.3.11** Destruction and Return

1267 Any unused agent, expired agent, and damaged agent will be destroyed according to applicable federal,  
1268 state, local and institutional guidelines and procedures.

1269

1270 **9.0 CORRELATIVE/ SPECIAL STUDIES**

1271 **9.1 Correlative Research**

1272 Preclinical studies suggested that regorafenib treatment reduced tumor-infiltrating macrophages  
 1273 through inhibition of CSF1 receptor. A phase I clinical trial has demonstrated that response to the  
 1274 combination of regorafenib with nivolumab correlated with a decrease in effector Tregs. To study the  
 1275 immune alterations and identify biomarkers correlate to response RIN combination, we propose the  
 1276 following correlative studies to analyze the immune cells within tumors pre and post to treatment, as  
 1277 well as immune alterations in peripheral blood, before and after cycle 1 and cycle 2 and at progression.  
 1278 In addition, archival tissue will be requested, when available, all study patients. In addition, pre-  
 1279 treatment (within 2 weeks) before day 1 of cycle 1 and post-treatment (cycle 2, between day 14 and day  
 1280 28), biopsies will be obtained from patients enrolled on the expansion arm when feasible (biopsy  
 1281 amenable).

- 1282 1. Archived tumor samples and tumor biopsies (4 x 18 core needle biopsies when feasible) will be  
 1283 obtained and analyzed by multi-spectra IHC staining. Immune markers will be used include:  
 1284 CD163, CD68, CSF-1R, VEGFR-2, Foxp3, CD3, CD4, CD8, CD45RA, CD20, CD56, PD-1, CTLA-4 and  
 1285 PD-L1.
- 1286 2. 15-color FACS analysis to phenotype immune cell subsets and functional readouts of biopsies  
 1287 and peripheral blood, including ex vivo cytokine production and signaling, markers include: CD3,  
 1288 CD8, CD4, FOXP3, CD45RA, CCR7, CD16, CD14, CD20, CD56, CD33, CD137, HLA-DR, PD-1, PD-L1,  
 1289 CTLA-4, IL-2, IFN- $\gamma$ , TNF- $\alpha$ , T-bet, eomes, CD54, CD70, CD80, CD86
- 1290 3. TCR repertoire analysis via deep sequencing of T cells in the peripheral blood. Expansion of the T  
 1291 cell repertoire after therapy may indicate epitope spread and suggest active immune response
- 1292 4. 30-plex bead-based immunoassay on the Luminex platform to evaluate cytokines pre and post  
 1293 treatment involved in T cell activation, expansion, proliferation, differentiation as well as  
 1294 immunosuppressive cytokines

1295 **9.2 Correlative Tumor Study**

1296 An overview of collection, processing, and analysis details are shown in [Table 9.2](#).

1297 **NOTE:** Tumor correlative studies **do not** apply to participants undergoing re-treatment per [Section 6.8](#).

1298 **Table 9.2 Tumor Tissue Studies Overview**

| Tissue Type & Timepoint of Collection                                                                                                                                                                                                           | Receiving Lab                                                                  | Downstream Analysis                                                                                                               |
|-------------------------------------------------------------------------------------------------------------------------------------------------------------------------------------------------------------------------------------------------|--------------------------------------------------------------------------------|-----------------------------------------------------------------------------------------------------------------------------------|
| If available/ feasible, FFPE archival tissue ( <a href="#">Section 9.2.1</a> )                                                                                                                                                                  | Dr. Peter Lee’s Laboratory                                                     | Predictive markers of response or resistense                                                                                      |
| <i>Research</i> fresh tumor tissue(4 cores from 1 lesion/ timepoint; <a href="#">Section 9.2.2</a> ) <ul style="list-style-type: none"> <li>• Within 21 days prior to Cycle 1 Day 1</li> <li>• The 1<sup>st</sup> 3 weeks of cycle 2</li> </ul> | Contact: Jian Ye( <a href="mailto:jiye@coh.org">jiye@coh.org</a> ) or designee | <ul style="list-style-type: none"> <li>• Immune cell profile in the tumor microenvironment</li> <li>• T cell evolution</li> </ul> |

- 1299 **9.2.1 Formalin fixed paraffin embedded (FFPE) archival tissue**
- 1300 • Tissue should precede prior RIN therapy
- 1301 – Upon notification to the Study PI that tissue is unavailable or cannot feasibly be
- 1302 obtained, **exceptions** may be granted by the Study PI.
- 1303 – If available and feasible, to be submitted anytime during screening/ during
- 1304 treatment.
- 1305 • Ideally submit 3  $\mu\text{m}$  thick x 20 unstained slides and 3  $\mu\text{m}$  thick X 1 H&E stained should to Dr.
- 1306 Lee’s laboratory.
- 1307 • Review of archival tissue and downstream analysis will be considered research.
- 1308 **9.2.2 Fresh tumor biopsies**
- 1309 • Provide **at least one day advance notice** to the Lee Laboratory of pending collection.
- 1310 – **Send calendar invite via e-mail** to Jian Ye ([jiye@coh.org](mailto:jiye@coh.org)) or designee
- 1311 • If feasible the same metastatic lesion should be sampled at both time points indicated above
- 1312 in [Table 9.2](#).
- 1313 • **Four cores** (each 4 x18 gauge needle biopsies) will be obtained **from the same lesion** at each
- 1314 time point for research purposes.
- 1315 **NOTE: If it is not feasible/safe** to obtain 3-4 cores / time point or obtain any cores, it will
- 1316 not be a deviation.
- 1317 1. Place 2 cores in saline **on ice** and promptly deliver to Dr. Lee’s laboratory.
- 1318 2. Fix 2cores in formalin and embed in paraffin
- 1319 a. Send to COH Pathology for slide preparation.
- 1320 b. If feasible, per each core request 3  $\mu\text{m}$  thick x 20 unstained slides and 3  $\mu\text{m}$
- 1321 thick X 1 H&E stained slide
- 1322 c. Send cut slides to Dr. Lee’s laboratory.

1323 **9.3 Correlative Blood Study**

1324 Blood samples will be collected from an indwelling venous catheter or by venipuncture for the below

1325 stated analyses (see [Table 9.3](#)).

1326 **NOTE:** Blood correlative studies **do not** apply to participants undergoing re-treatment per [Section 6.8](#).

1327 **Table 9.3 Peripheral blood studies overview**

| Timepoint of collection                                                                                                                                                                | Volume per Timepoint | Tube Type | Processing/ Receiving Laboratory | Downstream Analysis                                                                                                                                                                                        |
|----------------------------------------------------------------------------------------------------------------------------------------------------------------------------------------|----------------------|-----------|----------------------------------|------------------------------------------------------------------------------------------------------------------------------------------------------------------------------------------------------------|
| <ul style="list-style-type: none"> <li>• Within 14 days prior to Cycle 1 Day 1</li> <li>• End of Cycles 1-4</li> <li>• Then end of every 3 cycles</li> <li>• At progression</li> </ul> | 30 mL                | Green-top | Dr. Peter Lee’s laboratory       | <ul style="list-style-type: none"> <li>• Circulating immune biomarker profile</li> <li>• Circulating ratio Tregs: effector T cells and ratio MDSC: effector T cells</li> <li>• Plasma cytokines</li> </ul> |

1328 **9.3.1 Notification of Pending Collection, Blood Collection and Labeling**

| Notification of Pending Collection to Lee Laboratory                                                                                                                                                                    | Labeling and Collection Details                                                                                                                                                                                                                                                                                                                                                      | Post-collection Instructions                                                                                                  |
|-------------------------------------------------------------------------------------------------------------------------------------------------------------------------------------------------------------------------|--------------------------------------------------------------------------------------------------------------------------------------------------------------------------------------------------------------------------------------------------------------------------------------------------------------------------------------------------------------------------------------|-------------------------------------------------------------------------------------------------------------------------------|
| <ul style="list-style-type: none"> <li>• Notify <b>at least one</b> day in advance)</li> <li>• <b>Send calendar invite via e-mail</b> to Jian Ye(<a href="mailto:jiye@coh.org">jiye@coh.org</a>) or designee</li> </ul> | <ol style="list-style-type: none"> <li>1. Label tubes with COH protocol #, subject ID, time of collection in 24-hour format, and timepoint of collection (e.g. D1C1 for Day1 of Cycle 1).</li> <li>2. Timepoints of collection are stated in <a href="#">Table 9.2</a>.</li> <li>3. Invert tubes eight times after collection.</li> <li>4. Place the tubes <b>on ice</b>.</li> </ol> | <ul style="list-style-type: none"> <li>• <b>Promptly</b> deliver the blood samples on ice to Dr. Lee’s Laboratory.</li> </ul> |

1329 **9.3.2 Processing of samples by Lee laboratory**

1330 Samples will be processed for peripheral blood mononuclear cells (PBMC) and plasma.

1331

1332

1333 **10.0 STUDY CALENDAR**

1334 All assessments may increase in frequency as clinically indicated.

1335 Re-treatment will follow the same assessments, tumor biopsy and blood correlative studies do not apply.

1336 **Table 10.0 Study Activity Calendar**

|                                                                                                     | <b>Screening</b> | <b>C1</b>      | <b>C2</b>      | <b>C3</b>      | <b>C4</b>      | <b>other cycles<sup>i</sup></b>                    | <b>Off<sup>j,m</sup> treatment</b> |
|-----------------------------------------------------------------------------------------------------|------------------|----------------|----------------|----------------|----------------|----------------------------------------------------|------------------------------------|
| <b>Informed Consent<sup>a</sup></b>                                                                 | X                |                |                |                |                |                                                    |                                    |
| <b>Demographics</b>                                                                                 | X <sup>c</sup>   |                |                |                |                |                                                    |                                    |
| <b>Concurrent Meds</b>                                                                              | X <sup>c</sup>   | X              | X              | X              | X              | X                                                  | X                                  |
| <b>Regorafenib D1-21<br/>Nivolumab IV every 2 weeks<br/>Ipilimumab IV every 6 weeks<sup>b</sup></b> |                  | X              | X              | X              | X              | X                                                  |                                    |
| <b>Tumor Biopsy<sup>d</sup></b>                                                                     | X                |                | X              |                |                | X                                                  |                                    |
| <b>Medical History and Height</b>                                                                   | X <sup>c</sup>   |                |                |                |                |                                                    |                                    |
| <b>Physical Exam and Toxicity Assessment</b>                                                        | X <sup>b</sup>   | X <sup>f</sup> | X              | X              | X              | X                                                  | X                                  |
| <b>Vitals and Weight</b>                                                                            | X <sup>b</sup>   | X              | X              | X              | X              | X                                                  | X                                  |
| <b>Performance Status</b>                                                                           | X <sup>b</sup>   | X <sup>f</sup> | X              | X              | X              | X                                                  | X                                  |
| <b>CBC, Diff, pls</b>                                                                               | X <sup>b</sup>   | X <sup>g</sup> | X              | X              | X              | X                                                  | X                                  |
| <b>Chemistry, amylase, lipase</b>                                                                   | X <sup>b</sup>   | X <sup>g</sup> | X              | X              | X              | X                                                  | X                                  |
| <b>CEA</b>                                                                                          | X <sup>b</sup>   | X <sup>g</sup> | X              | X              | X              | X                                                  |                                    |
| <b>Urinalysis</b>                                                                                   | X <sup>b</sup>   | X              | X              | X              | X              | X                                                  |                                    |
| <b>B-HCG</b>                                                                                        | X <sup>b</sup>   | X <sup>b</sup> | X <sup>b</sup> | X <sup>b</sup> | X <sup>b</sup> | X <sup>b</sup>                                     |                                    |
| <b>Tumor Assessment<sup>k</sup></b>                                                                 | X <sup>e</sup>   |                | X              |                | X              | X (every other cycle)                              | X <sup>l</sup>                     |
| <b>EKG<sup>n</sup></b>                                                                              | X                |                |                |                |                |                                                    |                                    |
| <b>Correlative Blood<sup>o</sup></b>                                                                | X                | X              | X              | X              | X              | The end of every 3 cycles and at tumor progression |                                    |

1337

1338 C = cycle. Each cycle is comprised of 4 weeks. regorafenib will be given once daily PO x 21 days every 28 days; nivolumab will be given IV every 2 weeks, and ipilimumab will be

- 1339 given IV every 6 weeks
- 1340 a. The appropriate signed and dated ICF must be obtained before any study-specific procedures are performed
- 1341 b. Procedures required  $\leq 7$  days before treatment; B-HCG pregnancy test should be performed in females who are still reproductive. A negative pregnancy test must be
- 1342 available within 24 hr before study drug administration
- 1343 c. Procedures required  $\leq 28$  days before first treatment
- 1344 d. Tumor biopsies will be performed within 2 weeks prior to study treatment and repeated in the last 2 weeks of cycle 2
- 1345 e. CT scans (or MRI if indicated) will be performed every 8 weeks (2 cycles). CT scans can be done within  $\pm 14$  days from the intended date.
- 1346 f. Physical examination and toxicity assessment will be performed within 24 hours before weekly on cycle 1 and every other week on subsequent cycles. Physical examination
- 1347 and toxicity assessment do not have to be repeated on cycle 1 if already performed within 1 week before first treatment. Performance status should be documented every
- 1348 cycle of treatment. Physical exam will be performed on D1 and D15 of each cycle.
- 1349 g. CBC, Diff, pls, chemistry (sodium, potassium, blood urea nitrogen (BUN), lactate dehydrogenase (LDH), magnesium, creatinine, total bilirubin, alkaline phosphatase, ALT,
- 1350 AST, calcium) will be performed on D1 and D15 of each cycle. CEA will be performed with the start of each cycle.
- 1351 h. Urinalysis for the purpose of urine protein assessment will be performed every cycle
- 1352 i. Patients without progressive disease will continue treatment until progression or until 2 years, whichever occurs earlier.
- 1353 j. When a subject discontinues dosing for any reason, he/she will undergo a safety follow-up visit at 30 days (+ 7 days) after the last dose of all components of study treatment.
- 1354 After disease progression or unacceptable AEs, post-treatment follow-up will occur every 3 months ( $\pm 14$  days) for survival- This can be performed through records review
- 1355 k. CT scans of the abdomen, pelvis, and chest will be performed only for subjects who have withdrawn from the study for reasons other than progressive disease and have not
- 1356 had radiographic tumor assessments performed within the previous 6 weeks).
- 1357 l. Disease assessment must be performed using modified RECIST criteria to assess tumor response (abdomen and pelvis  $\pm$  chest). MRI is acceptable. Throughout the
- 1358 duration of the study, the subjects should be followed by the same scanning techniques and equipment as in the baseline scans.
- 1359 m. Subjects who discontinue all components of study treatment due to unacceptable adverse events will also be assessed at each post-treatment follow-up visit for disease
- 1360 progression/survival and date of disease progression/death will be recorded
- 1361 n. EKG is done within 4 weeks before starting on study. This is an important baseline for future comparison if needed and is recommended for patients on immunotherapy. The
- 1362 study may be repeated if clinically indicated.
- 1363 o. Correlative research blood: Green-top tubes (30 mL per timepoint) should be placed **on ice**. **NOTE:** Refer to [Section 9.3](#) regarding collection and advance notification of
- 1364 sample collection to Dr. Peter Lee's laboratory

1365 **11.0 ENDPOINT DEFINITIONS/MEASUREMENT OF EFFECT**

1366 **11.1 Primary Endpoints**

| Primary Objectives                                                                                                                                                                                           | Endpoints/ Measurements                                                                                                                                                                                                                                                                                                                                                                                                                                                                                                                                                                                                                                                                                                                                                                                                                                                                                                                                                                                                                                                                                                                                                                                                                                                                                                                                                                                                                                                                                                                                                                                                                                                                                                                                                                                                                                                                                                                                                                                                                                                                                                                                                                                                                                                                                                                                                                                                                                                                                                                                                                                                                                                                                                                                                                                                                                                                                                          |
|--------------------------------------------------------------------------------------------------------------------------------------------------------------------------------------------------------------|----------------------------------------------------------------------------------------------------------------------------------------------------------------------------------------------------------------------------------------------------------------------------------------------------------------------------------------------------------------------------------------------------------------------------------------------------------------------------------------------------------------------------------------------------------------------------------------------------------------------------------------------------------------------------------------------------------------------------------------------------------------------------------------------------------------------------------------------------------------------------------------------------------------------------------------------------------------------------------------------------------------------------------------------------------------------------------------------------------------------------------------------------------------------------------------------------------------------------------------------------------------------------------------------------------------------------------------------------------------------------------------------------------------------------------------------------------------------------------------------------------------------------------------------------------------------------------------------------------------------------------------------------------------------------------------------------------------------------------------------------------------------------------------------------------------------------------------------------------------------------------------------------------------------------------------------------------------------------------------------------------------------------------------------------------------------------------------------------------------------------------------------------------------------------------------------------------------------------------------------------------------------------------------------------------------------------------------------------------------------------------------------------------------------------------------------------------------------------------------------------------------------------------------------------------------------------------------------------------------------------------------------------------------------------------------------------------------------------------------------------------------------------------------------------------------------------------------------------------------------------------------------------------------------------------|
| <p>The primary objective of this study is to determine the recommended dose level of the combination of regorafenib, nivolumab and ipilimumab in patients with advanced MSS metastatic colorectal cancer</p> | <p><b>Toxicities</b> will be graded per NCI CTCAE v5.0.</p> <ul style="list-style-type: none"> <li>• <i>During Cycle 1</i>, all grade toxicities with start and stop dates will be reported in the eCRFs.</li> <li>• <i>Cycle 2+ to end of Safety follow-up</i>, the highest grade for any toxicity plus Grade 3 or 4 event for the same toxicity (if not the highest grade) will be reported in the eCRFs.</li> </ul> <p><b>Dose Limiting Toxicity:</b> per CTCAE v5.0, Any of the following adverse events occurring during the primary DLT observation period (4 weeks, from the time of first administration of RIN [Cycle 1 Day 1] until the planned administration of the second cycle of regorafenib [Cycle 2 Day 1] that are at least possibly attributable to any of the 3 agents or their combination will be classified as a DLT. Patients have to receive at least 75% of the intended doses of regorafenib on cycle 1 to be considered DLT evaluable. Patients who receive &lt; 75% of the intended dose of regorafenib on the first cycle without satisfying the DLT criteria below will be replaced.</p> <ul style="list-style-type: none"> <li>• Any toxicity that would, in the opinion of the Study PI, prevent continued administration of protocol therapy</li> <li>• <i>Hematological</i> <ul style="list-style-type: none"> <li>– Grade 4 anemia;</li> <li>– Grade 4 neutropenia lasting &gt;7 days;</li> <li>– Febrile neutropenia, defined as absolute neutrophil count (ANC) &lt;1000/mm<sup>3</sup> with a single temperature of ≥ 38.3 degrees C (&gt;101 degrees F) or a sustained temperature of 38 degrees C (100.4 degrees F) for more than 1 hour;</li> <li>– Grade ≥ 3 neutropenic infection;</li> <li>– Grade ≥ 3 thrombocytopenia with bleeding;</li> <li>– Grade 4 thrombocytopenia</li> </ul> </li> <li>• <i>Non-hematological</i> <ul style="list-style-type: none"> <li>- Non-hematologic Grade ≥3 laboratory abnormality if medical intervention is required to treat the patient, or if the abnormality leads to hospitalization.</li> <li>- Inability to administer the full intended dose of nivolumab/ ipilimumab or to receive at least 75% of the intended dosing of regorafenib in the DLT period (28-day cycle) due to toxicity</li> <li>- Any Grade ≥ 3 toxicity, except for any of the following:                             <ul style="list-style-type: none"> <li>o Transient (≤6 hours) Grade 3 flu-like symptoms or fever, which is controlled</li> <li>o with medical management;</li> <li>o Transient (≤24 hours) Grade 3 fatigue, local reactions, or headache that</li> <li>o resolves to Grade ≤1;</li> <li>o Grade 3 nausea and vomiting controlled by optimal medical therapy within 72 hours</li> <li>o Grade 3 hypertension controlled by medical therapy;</li> <li>o Grade 3 diarrhea or Grade 3 skin toxicity that resolves</li> </ul> </li> </ul> </li> </ul> |

| Primary Objectives | Endpoints/ Measurements                                                                                                                                                                                                                                                                                                                                                                                                                                                                                                                                                                                                                                                                                                                                                                                                                                                                                                                                                                                                                                                             |
|--------------------|-------------------------------------------------------------------------------------------------------------------------------------------------------------------------------------------------------------------------------------------------------------------------------------------------------------------------------------------------------------------------------------------------------------------------------------------------------------------------------------------------------------------------------------------------------------------------------------------------------------------------------------------------------------------------------------------------------------------------------------------------------------------------------------------------------------------------------------------------------------------------------------------------------------------------------------------------------------------------------------------------------------------------------------------------------------------------------------|
|                    | <p>to Grade <math>\leq 1</math> in less than 7 days after medical management (eg, immunosuppressant treatment) has been initiated;</p> <ul style="list-style-type: none"> <li>○ Any Grade <math>\geq 3</math> amylase or lipase abnormality that is not associated with symptoms or clinical manifestations of pancreatitis;</li> <li>○ Tumor flare phenomenon defined as local pain, irritation, or rash localized at sites of known or suspected tumor.</li> <li>○</li> <li>○ Single laboratory values out of normal range that are unlikely related to trial treatment according to the investigator, do not have any clinical correlate, and resolve to Grade <math>\leq 1</math> within 7 days with adequate medical management are not considered DLTs.</li> <li>○</li> <li>○ Laboratory values that are abnormal and without clinical significance and do not require medical intervention</li> </ul> <p><b>NOTE:</b> AEs that would qualify as unacceptable toxicity by grade, were it not for attribution, must be probably or definitely attributed to another cause.</p> |

1367 **11.2 Secondary Endpoints**

| Secondary Objectives                                                                                                                                                                                                                                                                                        | Endpoints/ Measurements                                                                                                                                                                                                                                                                                                                                                                                                                                                                                                                                                                                                                                                                               |
|-------------------------------------------------------------------------------------------------------------------------------------------------------------------------------------------------------------------------------------------------------------------------------------------------------------|-------------------------------------------------------------------------------------------------------------------------------------------------------------------------------------------------------------------------------------------------------------------------------------------------------------------------------------------------------------------------------------------------------------------------------------------------------------------------------------------------------------------------------------------------------------------------------------------------------------------------------------------------------------------------------------------------------|
| <ol style="list-style-type: none"> <li>1. Assess the objective overall response rate</li> <li>2. Estimate the duration of response, duration of stable disease, PFS, and OS</li> <li>3. Describe the safety of this regimen as determined by frequency and severity of associated adverse events</li> </ol> | <ul style="list-style-type: none"> <li>• RECIST v 1.1 (<a href="#">Appendix C</a>) will be used to assess the following clinical outcomes: <ul style="list-style-type: none"> <li>- <b>Progression-free survival:</b> Time to disease progression/ relapse or death as a result of any cause</li> <li>- <b>Duration of response:</b> Time to progression or death</li> <li>- <b>Overall survival:</b> Time to death as a result of any cause</li> <li>- <b>ORR:</b> the percentage of measurable disease participants who have achieved either complete response (CR) or partial response (PR)</li> </ul> </li> <li>• <b>Incidence and severity of AEs</b> will be graded per NCI CTCAE v5</li> </ul> |

1368 **11.3 Exploratory Endpoints**

| Exploratory Objectives                                                                                                                                                                                                                                                                                                                                                                                                                               | Endpoints/ Measurements                                                                                                                                                                                                                                                                                                                                                                                                                                                                                                                                                                                                                                                                                                                                                                                                                                                                                                                                                                                                                           |
|------------------------------------------------------------------------------------------------------------------------------------------------------------------------------------------------------------------------------------------------------------------------------------------------------------------------------------------------------------------------------------------------------------------------------------------------------|---------------------------------------------------------------------------------------------------------------------------------------------------------------------------------------------------------------------------------------------------------------------------------------------------------------------------------------------------------------------------------------------------------------------------------------------------------------------------------------------------------------------------------------------------------------------------------------------------------------------------------------------------------------------------------------------------------------------------------------------------------------------------------------------------------------------------------------------------------------------------------------------------------------------------------------------------------------------------------------------------------------------------------------------------|
| <ol style="list-style-type: none"> <li>1. Correlate the presence of CSF1R+ macrophages, Tregs, TILs (tumor infiltrating lymphocytes) and tumor PD-L1, CTLA-4 and PD-1 expression (at baseline and post treatment) on tumor samples with response rate</li> <li>2. Characterize the systemic immune alteration through evaluation of mandatory pre and at the end of cycle 1-4, then end of every 3 cycles, and at progression blood draws</li> </ol> | <ul style="list-style-type: none"> <li>• <b>Archival tumor tissue</b> that preceded prior RIN therapy <ul style="list-style-type: none"> <li>- <i>Predictive markers of response/resistance:</i> multispectral IHC analysis in 2 population (responders vs non-responders)</li> </ul> </li> <li>• <b>Tumor tissue biopsies</b> obtained pre-treatment and post-treatment with combination therapy will be used to for the following: <ul style="list-style-type: none"> <li>- <i>Immune profile in the tumor microenvironment:</i> Change in immune cell profile and correlation to treatment response via mass spectrometry immunohistochemistry and flow analysis</li> <li>- <i>T cell evolution:</i> Change in T cell clonality via deep-sequencing</li> </ul> </li> <li>• <b>Serial blood samples</b> collected pre-treatment and during-treatment <ul style="list-style-type: none"> <li>- <i>Circulating immune biomarker profile:</i> Changes in Immune biomarker profile in the peripheral blood mononuclear cells</li> </ul> </li> </ul> |



| Exploratory Objectives | Endpoints/ Measurements                                                                                                                                                                                                                                                                                                                                                                                        |
|------------------------|----------------------------------------------------------------------------------------------------------------------------------------------------------------------------------------------------------------------------------------------------------------------------------------------------------------------------------------------------------------------------------------------------------------|
|                        | <p>(PBMC) compartment via multi-color flow cytometry</p> <ul style="list-style-type: none"> <li>- <i>Circulating ratio Tregs: effector T cells and ratio MDSC: effector T cells</i>: Number of circulating immunosuppressive T regulatory cells (Tregs), myeloid derived suppressor cells (MDSC) and effector T cells</li> <li>- <i>Plasma cytokines</i>: Plasma cytokine level changes and profile</li> </ul> |

## 1369 12.0 STATISTICAL CONSIDERATIONS

---

### 1370 12.1 Study Design

1371 This is a safety and activity trial[26], to evaluate RIN in MSS refractory metastatic CRC patients. Two dose  
1372 levels may be evaluated (see [Section 6.3](#)).Dose level 1 will be deemed tolerable if  $\leq 1/6$  patients experience  
1373 unacceptable toxicities during Cycle 1. If  $\geq 2/6$  patients experience unacceptable toxicities during Cycle 1,  
1374 then Dose Level -1 will be tested. Dose level -1 will be deemed tolerable if  $\leq 1/6$  patients experience  
1375 unacceptable toxicities during Cycle 1. If  $\geq 2/6$  patients experience unacceptable toxicities during Cycle 1,  
1376 then Dose Level -1 the regimen will be deemed intolerable and the study will close. RP2D will be selected to  
1377 enroll additional 20 patients for dose-expansion. If DLT satisfying toxicities are noted in  $> 33\%$  of patients at  
1378 the RP2D level (with a minimum of 9 treated patients), then the study will evaluate a dose level -1 as the  
1379 expansion dose (if RP2D is Dose Level 1) or will consider termination/ change is treatment schedule and  
1380 dose (if RP2D is Dose Level -1). A minimum of 10 patients should be treated in the expansion phase of the  
1381 reduced dose.

1382 An additional 10-patient cohort is added as an additional cohort to investigate the feasibility and safety of  
1383 an alternative regimen of a lower starting dose of regorafenib at 40mg/day for cycle and then escalate to  
1384 80mg/day starting cycle 2 and beyond. This cohort will determine if such a strategy can reduce the incidence  
1385 of grade 3 skin toxicities. An incidence of  $< 3$  grade 3 skin toxicities in this 10-patient cohort would be  
1386 considered favorable.

#### 1387 12.1.1 Primary Endpoints:

1388 The primary end point is to determine the recommended dose level by measuring safety/tolerability.  
1389 Tolerability is operationally defined as freedom from DLT, as defined in [Section 11.1](#). Tolerability is  
1390 monitored throughout the trial.

#### 1391 12.1.2 Secondary Endpoints:

1392 The secondary endpoint is clinical activity using RECIST v 1.1 include ORR, PFS, DOR, and OS.

#### 1393 12.1.3 Exploratory Endpoints:

1394 Correlative studies using serial tumor tissue and blood samples will assess immune response at pre-  
1395 treatment and post-treatment.

### 1396 12.2 Evaluable Participants and Participant Replacement

1397 

- **Evaluable for toxicity:** All patients who receive at least one dose of RIN will be evaluable for  
1398 toxicity.

1399 

- **Evaluable for DLT:**

1400 Participants will be considered evaluable for DLT if:

- 1401 1. They receive 1 ipilimumab, 1 nivolumab dose **AND** at least 75% of the planned regorafenib  
1402 dose during Cycle 1;**OR**
- 1403 2. They experience an DLT during Cycle 1 ([Section 11.1](#)).

1404 **Evaluable for Response:** Participants will be considered evaluable for response if they are confirmed  
1405 eligible, receive at least one dose of each of the study agent (Regorafenib, ipilimumab and  
1406 nivolumab) and have had their disease re-evaluated by imaging at least once during  
1407 treatment/follow-up, or are deemed to have clinical progression prior to imaging, or experience  
1408 early death due to disease prior to imaging

### 1409 12.3 Sample Size, Accrual Rate and Study Duration

1410 

- **Total accrual:** The total number of participants treated is expected to be 26 response-evaluable  
1411 patients. If UT events were to require a reduction in regorafenib dose, a total of 32 patients

1412 may be required. 29 patients have enrolled on the safety and expansion cohort. An additional  
1413 10-patient cohort will be added to investigate a lower starting dose of 40mg daily on cycle 1,  
1414 followed by the identified recommended dose of 80 mg daily starting cycle 2 and beyond in  
1415 order to reduce grade 3 and above skin toxicities. The total enrollment will be 39 patients.  
1416 ○ **Accrual rate and Study Duration:** Assuming 2 patient enrolls each month, accrual is expected to  
1417 be completed in 13-16 months. Study duration is planned for 3years.

#### 1418 **12.4 Stopping Rules – Treatment-Related Death**

1419 A treatment-related death at any point will cause the trial to be halted, and a full review of the data by the  
1420 COH Data Safety Monitoring Committee (DSMC) will be mandated. Patient accrual will not resume until  
1421 approved by the regulatory committees, including DSMC.

#### 1422 **12.5 Statistical Analysis Plan**

1423 Safety and tolerability will be addressed by summarizing the incidence of adverse events by MEDDRA term,  
1424 and grade, with any unacceptable toxicities identified, and with aggregation by organ systems.

1425 A 3+3 design will be used to evaluate the safety of regorafenib given at 80mg (orally once daily x 21 days  
1426 every 28 days or 40 mg once daily x 21 days every 28 days if the 80 mg dose level is not tolerated) when  
1427 combined with nivolumab and ipilimumab at the fixed doses. Additional 20 patients will be enrolled for the  
1428 dose-expansion part of the study at the selected RP2D. The dose-expansion study aims to estimate the ORR  
1429 (CR + PR) by RECIST v1.1 for the 3-drug combination and we anticipate the combination therapy will achieve  
1430 ORR similar or higher than regorafenib combined with nivolumab at 33%. Exact binomial 95% confidence  
1431 interval will be provided for the estimated ORR with Person-Klopper method. In addition, we will test the  
1432 hypothesis  $ORR \geq 33\%$  against historical data for nivolumab and ipilimumab alone with  $ORR < 5\%$ . With 26  
1433 patients treated at RP2D, a single arm Binomial test rejects the null hypothesis with type I error 0.05 and  
1434 99% power. For a more conservative estimate of the ORR at 21%, the test still has 82% power. The null  
1435 hypothesis of 5% will be rejected when at least 4 out of 26 patients respond with  $ORR \geq 15.4\%$ . When 5 out of  
1436 26 patients respond, the ORR is estimated 19.3% and the 95% C.I. by Person-Kleopper method rules out the  
1437 true ORR less than 6.6%. When further reduction is made from the RP2D at dose level -1, with the minimum  
1438 10 patients, we will have 79% power to test the ORR at 33% against the null of  $< 5\%$  and the null will be  
1439 rejected when  $\geq 3$  patients respond.

1440 Secondary endpoints of survival and PFS will be summarized using the Kaplan-Meier method. Duration of  
1441 response (possibly censored) will be reported for each response.

1442 The exploratory endpoints will be summarized using exploratory methods. Changes in tumor and blood  
1443 measurements from pre-treatment to post-treatment will be displayed graphically and summarized with  
1444 responding individuals identified. Academic standard statistical methods will be used for these exploratory  
1445 analyses.  
1446

1447 **13.0 DATA HANDLING, DATA MANAGEMENT, RECORD KEEPING**

---

1448 **13.1 Source Documents**

1449 Source documents are original documents, data, and records (e.g., medical records, pharmacy dispensing  
1450 records, recorded data from automated instruments, laboratory data) that are relevant to the clinical trial.  
1451 The investigator or their designee will prepare and maintain adequate and accurate source documents.  
1452 These documents are designed to record all observations and other pertinent data for each patient enrolled  
1453 in this clinical trial. Source documents must be adequate to reconstruct all data transcribed onto the case  
1454 report forms.

1455 **13.2 Data Capture Methods and Management**

1456 Data for this trial will be collected using City of Hope’s electronic capture system that is compliant with 21  
1457 CFR Part 11.

1458 Study personnel will enter data from source documents corresponding to a subject’s visit into the protocol-  
1459 specific electronic Case Report Form (eCRF).

1460 **13.3 Case Report Forms/Data Submission Schedule**

1461 Study personnel will enter data from source documents corresponding to a subject’s visit into the protocol-  
1462 specific electronic Case Report Form (eCRF) when the information corresponding to that visit is available.

1463 The investigator is responsible for all information collected on subjects enrolled in this study. All data  
1464 collected during this study must be reviewed and verified for completeness and accuracy by the  
1465 investigator. All case report forms must be completed by designated study personnel. The completed case  
1466 report forms must be reviewed, signed and dated by the Investigator or designee in a timely fashion.

1467 All data will be collected using electronic data collection, stored as indicated in [Section 13.2](#).

1468 **13.4 Regulatory Records**

1469 The investigator will maintain regulatory records, including updating records in accordance with Good  
1470 Clinical Practice guidelines and FDA regulations.

1471 **14.0 DATA & SAFETY MONITORING PLAN, ADVERSE EVENT AND UNANTICIPATED PROBLEM REPORTING**

---

1472 **14.1 Definitions**

1473 **14.1.1 Adverse Event (AE)**

1474 An adverse event is any untoward medical experience or change of an existing condition that occurs during  
1475 or after treatment, whether or not it is considered to be related to the protocol intervention.

1476 **14.1.2 Serious Adverse Event (SAE)**

1477 A serious adverse event is any expected or unexpected adverse events that result in any of the following  
1478 outcomes:

- 1479 • Death
- 1480 • Is life-threatening experience (places the subject at immediate risk of death from the event as it  
1481 occurred)
- 1482 • Unplanned hospitalization (equal to or greater than 24 hours) or prolongation of existing  
1483 hospitalization
- 1484 • A persistent or significant disability/incapacity
- 1485 • A congenital anomaly/birth defect
- 1486 • Secondary malignancy\*
- 1487 • Any other adverse event that, based upon appropriate medical judgment, may jeopardize the  
1488 subject's health and may require medical or surgical intervention to prevent one of the outcomes  
1489 listed above (examples of such events include allergic bronchospasm requiring intensive treatment  
1490 in the emergency room or at home, blood dyscrasias or convulsions that do not result in inpatient  
1491 hospitalization, or the development of drug dependency or drug abuse).

1492 \*Modified from [21 CFR 312.32](#)

1493

1494 The following hospitalizations are not considered SAEs in BMS clinical studies:

- 1495 ○ a visit to the emergency room or other hospital department < 24 hours, that does not result in  
1496 admission (unless considered an important medical or life-threatening event)
- 1497 ○ elective surgery, planned prior to signing consent
- 1498 ○ admissions as per protocol for a planned medical/surgical procedure
- 1499 ○ routine health assessment requiring admission for baseline/trending of health status (e.g., routine  
1500 colonoscopy)
- 1501 ○ Medical/surgical admission other than to remedy ill health and planned prior to entry into the study.  
1502 Appropriate documentation is required in these cases.
- 1503 ○ Admission encountered for another life circumstance that carries no bearing on health status and  
1504 requires no medical/surgical intervention (e.g., lack of housing, economic inadequacy, caregiver  
1505 respite, family circumstances, administrative reason).
- 1506 ○ Admission for administration of anticancer therapy in the absence of any other SAEs (applies to  
1507 oncology protocols)

1508 **14.1.3 Unanticipated Problems Involving Risks to Subjects or Others**

1509 An unanticipated problem is any incident, experience, or outcome that **meets all three** of the following  
1510 criteria:

- 1511 1. Unexpected (in terms of nature, severity, or frequency) given the following: a) the research  
1512 procedures described in the protocol-related documents such as the IRB approved research protocol,

1513 informed consent document or Investigator Brochure (IB); and b) the characteristics of the subject  
1514 population being studied; **AND**

1515 2. Related or possibly related to participation in the research (possibly related means there is a  
1516 reasonable possibility that the incident, experience, or outcomes may have been caused by the drugs,  
1517 devices or procedures involved in the research); **AND**

1518 3. Suggests that the research places subjects or others at greater risk of harm (including physical,  
1519 psychological, economic, or social harm) than previously known or recognized.

#### 1520 **14.1.4 Pregnancy and Breastfeeding**

1521 If, following initiation of the investigational product, it is subsequently discovered that a study participant is  
1522 pregnant or may have been pregnant at the time of investigational product exposure, including during at  
1523 least 5 half-lives after product administration, the investigational product will be permanently discontinued  
1524 in an appropriate manner (e.g., dose tapering if necessary for participant).

1525 The investigator must immediately notify Worldwide.Safety@bms.com of this event and complete one of  
1526 the following forms within 24 hours of awareness of the event via either the CIOMS, MedWatch or  
1527 appropriate Pregnancy Surveillance Form in accordance with SAE reporting procedures.

1528 Protocol-required procedures for study discontinuation and follow-up must be performed on the  
1529 participant.

1530 Follow-up information regarding the course of the pregnancy, including perinatal and neonatal outcome  
1531 and, where applicable, offspring information must be reported on the CIOMS, MedWatch, BMS Pregnancy  
1532 Surveillance Form, or approved site SAE form. A BMS Pregnancy Surveillance Form may be provided upon  
1533 request.

1534 Any pregnancy that occurs in a female partner of a male study participant should be reported to BMS.  
1535 Information on this pregnancy will be collected on the Pregnancy Surveillance Form. In order for Sponsor or  
1536 designee to collect any pregnancy surveillance information from the female partner, the female partner  
1537 must sign an informed consent form for disclosure of this information.

#### 1538 **14.1.5 Abnormal liver function tests**

1539 Liver function tests that meet the following criteria as determined by way of protocol-specified laboratory  
1540 testing or unscheduled laboratory testing must be reported expeditiously to BMS.

1541 Potential drug induced liver injury is defined as:

1542 1) AT (ALT or AST) elevation > 3 times upper limit of normal (ULN)

1543 **AND**

1544 2) Total bilirubin > 2 times ULN, without initial findings of cholestasis (elevated serum alkaline  
1545 phosphatase)

1546 **AND**

1547 No other immediately apparent possible causes of AT elevation and hyperbilirubinemia, including, but not  
1548 limited to, viral hepatitis, pre-existing chronic or acute liver disease, or the administration of other drug(s)  
1549 known to be hepatotoxic.

1550 These criteria are based upon available regulatory guidance documents. The purpose of the criteria is to  
1551 specify a threshold of abnormal hepatic tests that may require an additional evaluation for an underlying  
1552 etiology.

#### 1553 **14.2 Assessment of Adverse Events**

1554 The site Investigator will be responsible for determining the event name, assessing the severity (i.e. grade),  
1555 expectedness, and attribution of all adverse events.

1556 **14.2.1 Assessment of Adverse Event Name and Grade**

1557 Adverse events will be characterized using the descriptions and grading scales found in the most recent  
1558 version of CTCAE. A copy of the scale can be found at  
1559 [https://ctep.cancer.gov/protocolDevelopment/electronic\\_applications/ctc.htm](https://ctep.cancer.gov/protocolDevelopment/electronic_applications/ctc.htm). The determination of  
1560 severity for all other events not listed in the CTCAE should be made by the investigator based on medical  
1561 judgment and the severity categories of Grade 1 to 5 as defined below:

- 1562 • Grade 1 (mild) – An event that is usually transient and may require only minimal treatment or  
1563 therapeutic intervention. The event does not generally interfere with usual activities of daily living.
- 1564 • Grade 2 (moderate) – An event that is usually alleviated with additional specific therapeutic  
1565 intervention. The event interferes with usual activities of daily living, causing discomfort but poses  
1566 no significant or permanent risk of harm to the subject.
- 1567 • Grade 3 (severe) – An event that requires intensive therapeutic intervention. The event interrupts  
1568 usual activities of daily living, or significantly affects the clinical status of the subject.
- 1569 • Grade 4 (life threatening) – An event, and/or its immediate sequelae, that is associated with an  
1570 imminent risk of death or with physical or mental disabilities that affect or limit the ability of the  
1571 subject to perform activities of daily living (eating, ambulation, toileting, etc).
- 1572 • Grade 5 (fatal) – Death (loss of life) as a result of an event.

1573

1574 **14.2.2 Assessment of Attribution**

1575 The following definitions will be used to determine the causality (attribution) of the event to the study agent  
1576 or study procedure.

- 1577 • **Unrelated** – The event is clearly related to other factors such as the participant’s clinical state, other  
1578 therapeutic interventions, or concomitant medications administered to the participant.
- 1579 • **Unlikely** – The event is doubtfully related to the investigational agent(s). The event was most likely  
1580 related to other factors such as the participant’s clinical state, other therapeutic interventions, or  
1581 concomitant drugs.
- 1582 • **Possible** – The event follows a reasonable temporal sequence from the time of drug administration,  
1583 but could have been produced by other factors such as the participant’s clinical state, other  
1584 therapeutic interventions, or concomitant drugs.
- 1585 • **Probable** – The event follows a reasonable temporal sequence from the time of drug administration,  
1586 and follows a known response pattern to the study drug. The event cannot be reasonably explained  
1587 by other factors such as the participant’s clinical state, therapeutic interventions, or concomitant  
1588 drugs.
- 1589 • **Definite** – The event follows a reasonable temporal sequence from the time of drug administration,  
1590 follows a known response pattern to the study drug, cannot be reasonably explained by other  
1591 factors such as the participant’s condition, therapeutic interventions, or concomitant drugs, AND  
1592 occurs immediately following study drug administration, improves upon stopping the drug, or  
1593 reappears on re-exposure.

1594

1595 **14.2.3 Assessment of Expectedness**

1596 The following definitions will be used to determine the expectedness of the event:

- 1597 • **Unexpected** – An adverse event is unexpected if it is not listed in the investigator’s brochure and/or  
1598 package insert; is not listed at the specificity or severity that has been observed; is not consistent  
1599 with the risk information described in the protocol and/or consent; is not an expected natural

1600 progression of any underlying disease, disorder, condition, or predisposed risk factor of the research  
1601 participant experiencing the adverse event. \*Modified from [21 CFR 312.32 \(a\)](#)

- 1602 • **Expected** – An adverse event is expected if it does not meet the criteria for an unexpected event, OR  
1603 is an expected natural progression of any underlying disease, disorder, condition, or predisposed  
1604 risk factor of the research participant experiencing the adverse event.

### 1605 **14.3 Reporting of Adverse Events**

#### 1606 **14.3.1 Routine Reporting of Non-Serious Adverse Events**

1607 Routine AE recording will occur via data entry into the study eCRF. Recording of adverse events will begin  
1608 after the patient is given the study treatment or any study related procedures. Adverse events will be  
1609 monitored by the Protocol Management Team (PMT). Adverse events that do not meet the criteria of  
1610 serious OR are not unanticipated problems do not require expedited reporting. AEs reported through  
1611 expedited processes (i.e. reported to the IRB, DSMC, FDA, etc.) must also be reported in routine study data  
1612 submissions.

#### 1613 **14.3.2 Expediting Reporting Requirements of SAEs and UPs**

1614 Adverse events that meet the criteria of serious OR are unanticipated problems will be reported according  
1615 to the approved [City of Hope’s Institutional policy](#) via the AE/UP reporting form in [iRIS](#). Reportable serious  
1616 adverse events must be followed until the event is resolved, stabilized, or determined to be irreversible by  
1617 the investigator. Follow-up SAE reports must be submitted for all events that require expedited reporting  
1618 when the status of the event changes and until the resolution or stabilization of the event.  
1619

#### 1620 **14.3.3 Additional AE Reporting Requirements**

##### 1621 **14.3.3.1 Reporting to the FDA**

1622 The study PI (or designee) will be responsible for contacting the Office of IND Development and Regulatory  
1623 Affairs (OIDRA) at COH to ensure prompt reporting of safety reports to the FDA. OIDRA will assist the PI  
1624 with the preparation of the report and submit the report to the FDA in accordance with the approved [City of  
1625 Hope’s Institutional policy](#).

1626  
1627 Serious Adverse Events meeting the requirements for expedited reporting to the Food and Drug  
1628 Administration (FDA), as defined in [21 CFR 312.32](#), will be reported as an IND safety report using the  
1629 [MedWatch Form FDA 3500A for Mandatory Reporting](#).

1630 The criteria that require reporting using the Medwatch 3500A are:

- 1631 • Any unexpected fatal or life threatening adverse experience associated with use of the drug  
1632 must be reported to the FDA no later than 7 calendar days after initial receipt of the information  
1633 [\[21 CFR 312.32\(c\)\(2\)\]](#)
- 1634 • Any adverse experience associated with use of the drug that is both serious and unexpected  
1635 must be submitted no later than 15 calendar days after initial receipt of the information [\[21 CFR  
1636 312.32\(c\)\(1\)\]](#)
- 1637 • Any follow-up information to a study report shall be reported as soon as the relevant  
1638 information becomes available. [\[21 CFR 312.32\(d\)\(3\)\]](#)  
1639

1640 In addition, the study PI will submit annually within 60 days (via COH OIDRA) of the anniversary date of  
1641 when the IND went into effect, an annual report to the FDA which is to include a narrative summary and  
1642 analysis of the information of all FDA reports within the reporting interval, a summary report of adverse  
1643 drug experiences, and history of actions taken since the last report because of adverse drug experiences.

##### 1644 **14.3.3.2 Reporting to BMS**

- 1645 • All Serious Adverse Events (SAEs) that occur following the subject’s written consent to participate in  
1646 the study through 100days of discontinuation of dosing must be reported to BMS Worldwide Safety,



1647 whether related or not related to study drug. If applicable, SAEs must be collected that relate to any  
1648 later protocol-specified procedure (eg, a follow-up skin biopsy).

- 1649 • Following the subject’s written consent to participate in the study, all SAEs, whether related or not  
1650 related to study drug, are collected, including those thought to be associated with protocol-  
1651 specified procedures. The investigator should report any SAE occurring after these aforementioned  
1652 time periods, which is believed to be related to study drug or protocol-specified procedure.
- 1653 • An SAE report should be completed for any event where doubt exists regarding its seriousness;
- 1654 • If the investigator believes that an SAE is not related to study drug, but is potentially related to the  
1655 conditions of the study (such as withdrawal of previous therapy or a complication of a study  
1656 procedure), the relationship should be specified in the narrative section of the SAE Report Form.

1657 An appropriate SAE form (e.g.ex-US = CIOMS form or USA = Medwatch form) should be used to report SAEs  
1658 to BMS. If you prefer to use your own Institutional form, it must be reviewed by the BMS Protocol Manager  
1659 prior to study initiation to ensure that at a minimum all of the data elements on the CIOMS form are  
1660 present. Note: Please include the BMS Protocol number on the SAE form or on the cover sheet with the  
1661 SAE form transmission.

- 1662 ✓ The CIOMS form is available at: <http://www.cioms.ch/index.php/cioms-form-i>
- 1663 ✓ The MedWatch form is available at: [MedWatch 3500 Form](#)

- 1664 • For studies with long-term follow-up periods in which safety data are being reported, include the  
1665 timing of SAE collection.
- 1666 • The Sponsor will reconcile the clinical database AE cases (**case level only**) transmitted to BMS Global  
1667 Pharmacovigilance ([Worldwide.Safety@bms.com](mailto:Worldwide.Safety@bms.com)).
- 1668     ▪ The Investigator will request from BMS GPV&E, [aepbusinessprocess@bms.com](mailto:aepbusinessprocess@bms.com) the  
1669 SAE reconciliation report and include the BMS protocol number every 3 months and  
1670 prior to data base lock or final data summary
- 1671     ▪ GPV&E will send the investigator the report to verify and confirm all SAEs have been  
1672 transmitted to BMS GPV&E.
- 1673     ▪ The data elements listed on the GPV&E reconciliation report will be used for case  
1674 identification purposes. If the Investigator determines a case was not transmitted to  
1675 BMS GPV&E, the case should be sent immediately to BMS  
1676 ([Worldwide.Safety@bms.com](mailto:Worldwide.Safety@bms.com)).

- 1677 • In addition to the Sponsor Investigator’s responsibility to report events to their local HA, suspected  
1678 serious adverse reactions (whether expected or unexpected) shall be reported by BMS to the  
1679 relevant competent health authorities in all concerned countries according to local regulations  
1680 (either as expedited and/or in aggregate reports).
- 1681 • In accordance with local regulations, BMS will notify sponsor investigators of all reported SAEs that  
1682 are suspected (related to the investigational product) and unexpected (ie, not previously described  
1683 in the IB). An event meeting these criteria is termed a Suspected, Unexpected Serious Adverse  
1684 Reaction (SUSAR). Sponsor investigator notification of these events will be in the form of either a  
1685 SUSAR Report or a Semi-Annual SUSAR Report.
- 1686     ✓ Other important findings which may be reported by BMS as an Expedited Safety Report  
1687 (ESR) include: increased frequency of a clinically significant expected SAE, an SAE considered  
1688 associated with study procedures that could modify the conduct of the study, lack of  
1689 efficacy that poses significant hazard to study subjects, clinically significant safety finding  
1690 from a nonclinical (eg, animal) study, important safety recommendations from a study data  
1691 monitoring committee, or sponsor or BMS decision to end or temporarily halt a clinical  
1692 study for safety reasons.

1693 ✓ Upon receiving an ESR from BMS, the investigator must review and retain the ESR with the  
1694 IB. Where required by local regulations or when there is a central IRB/IEC for the study, the  
1695 sponsor will submit the ESR to the appropriate IRB/IEC. The investigator and IRB/IEC will  
1696 determine if the informed consent requires revision. The investigator should also comply  
1697 with the IRB/IEC procedures for reporting any other safety information.

1698

1699 SAEs, whether related or not related to study drug, and pregnancies must be reported to BMS within 24  
1700 hours \ 1 Business Day of becoming aware of the event. SAEs must be recorded on either CIOMS,  
1701 MedWatch, or approved site SAE form.

1702 Pregnancies must be reported and submitted to BMS. BMS will perform due diligence follow-up using the  
1703 BMS Pregnancy Form which the investigator must complete.

1704 **SAE Email Address:** Worldwide.Safety@BMS.com

1705 **SAE Facsimile Number:** +1 609-818-3804

1706 If only limited information is initially available, follow-up reports are required. (Note: Follow-up SAE reports  
1707 should include the same investigator term(s) initially reported.)

1708 If an ongoing SAE changes in its intensity or relationship to study drug or if new information becomes  
1709 available, a follow-up SAE report should be sent within 24 hours \ 1 Business Day to BMS using the same  
1710 procedure used for transmitting the initial SAE report.

1711 All SAEs should be followed to resolution or stabilization.

1712 The causal relationship to study drug is determined by a physician and should be used to assess all adverse  
1713 events (AE). The casual relationship can be one of the following:

1714 Related: There is a reasonable causal relationship between study drug administration and the AE.

1715 Not related: There is not a reasonable causal relationship between study drug administration and the AE.

1716 The term "reasonable causal relationship" means there is evidence to suggest a causal relationship.

1717 Adverse events can be spontaneously reported or elicited during open-ended questioning, examination, or  
1718 evaluation of a subject. (In order to prevent reporting bias, subjects should not be questioned regarding the  
1719 specific occurrence of one or more AEs.)

1720 **NONSERIOUS ADVERSE EVENT**

- 1721 • Non-serious Adverse Events (AE) are to be provided to BMS in aggregate via interim or final study  
1722 reports as specified in the agreement or, if a regulatory requirement [eg, IND US trial] as part of an  
1723 annual reporting requirement.
- 1724 • Non-serious AE information should also be collected from following the subject's written consent to  
1725 participate in the study.

1726 **Non-serious Adverse Event Collection and Reporting**

1727 The collection of non-serious AE information should begin following the subject's written consent to  
1728 participate in the study. All non-serious adverse events (not only those deemed to be treatment-related)  
1729 should be collected continuously during the treatment period and for a minimum of 90 days following the  
1730 last dose of study treatment.

1731 Non-serious AEs should be followed to resolution or stabilization, or reported as SAEs if they become  
1732 serious. Follow-up is also required for non-serious AEs that cause interruption or discontinuation of study  
1733 drug and for those present at the end of study treatment as appropriate.

1734 **Laboratory Test Abnormalities**

1735 All laboratory test results captured as part of the study should be recorded following institutional  
1736 procedures. Test results that constitute SAEs should be documented and reported to BMS as such.

1737 The following laboratory abnormalities should be documented and reported appropriately:

- 1738 • any laboratory test result that is clinically significant or meets the definition of an SAE
- 1739 • any laboratory abnormality that required the participant to have study drug discontinued or  
1740 interrupted
- 1741 • any laboratory abnormality that required the subject to receive specific corrective therapy.

1742 It is expected that wherever possible, the clinical rather than laboratory term would be used by the  
1743 reporting investigator (eg, anemia versus low hemoglobin value).

1744 **15.0 PROTOCOL DEVIATIONS & SINGLE SUBJECT EXCEPTIONS**

---

1745 It is understood that deviations from the protocol should be avoided, except when necessary to eliminate an  
1746 immediate hazard to a research participant. Brief interruptions and delays may occasionally be required  
1747 because of travel delays, airport closures, inclement weather, family responsibilities, security alerts,  
1748 government holidays, and so forth. Delays can also extend to complications of disease or unrelated medical  
1749 illnesses not related to disease progression. The PI has the discretion to deviate from the protocol when  
1750 necessary so long as such a deviation does not threaten patient safety or protocol scientific integrity. As a  
1751 result of deviations, corrective actions are to be developed by the study staff and implemented promptly.

1752 **15.1 Definitions**

1753 **15.1.1 Deviation**

1754 A deviation is a divergence from a specific element of a protocol that occurred without prior IRB approval.  
1755 Investigators may deviate from the protocol to eliminate immediate hazard(s) for the protection, safety, and  
1756 well-being of the study subjects without prior IRB approval. Examples include, but are not limited to: a) dose  
1757 adjustments based on excessive patient weight; b) alteration in treatment schedule due to non-availability  
1758 of the research participant for treatment; and c) laboratory test results which are slightly outside the  
1759 protocol requirements but at levels that do not affect participant safety.

1760 **15.1.2 Single Subject Exceptions (SSE)**

1761 An SSE is a planned deviation, meaning that it involves circumstances in which the specific procedures called  
1762 for in a protocol are not in the best interests of a specific patient. It is a deviation that is anticipated and  
1763 receives **prior** approval by the Principal Investigator and the COH IRB.

1764 **15.2 Reporting of Deviations and Single Subject Exceptions**

1765 **15.2.1 Reporting Deviations**

1766 For any deviation, the Investigator will notify the COH DSMC and IRB within 5 calendar days of its  
1767 occurrence via [iRIS](#) in accordance with the [Clinical Research Protocol Deviation policy](#).

1768 **15.2.2 Reporting Single Subject Exceptions as Planned Protocol Deviations**

1769 The SSE must be submitted as a “Single Subject Exception Amendment Request” via [iRIS](#) in accordance with  
1770 IRB guidelines and the [Clinical Research Protocol Deviation policy](#). An IRB approved SSE does not need to be  
1771 submitted as a deviation to the DSMC.

1772

1773 In addition, if contractually obligated, the sponsor must also approve the deviation.

1774 **16.0 STUDY OVERSIGHT, QUALITY ASSURANCE, & DATA AND SAFETY MONITORING**

---

1775 **16.1 All Investigator Responsibilities**

1776 An investigator is responsible for ensuring that an investigation is conducted according to the signed  
1777 investigator statement, the investigational plan, and applicable regulations; for protecting the rights, safety,  
1778 and welfare of subjects under the investigator's care; and for the control of drugs under investigation.

1779  
1780 All Investigators agree to:

- 1781 • Conduct the study in accordance with the protocol and only make changes after notifying the Sponsor  
1782 (or designee), except when necessary to protect the safety, rights or welfare of subjects.
- 1783 • Personally conduct or supervise the study (or investigation).
- 1784 • Ensure that the requirements relating to obtaining informed consent and IRB review and approval  
1785 meet federal guidelines, as stated in § 21 CFR, parts 50 and 56.
- 1786 • Report to the Sponsor or designee any AEs that occur in the course of the study, in accordance with  
1787 §21 CFR 312.64.
- 1788 • Ensure that all associates, colleagues and employees assisting in the conduct of the study are  
1789 informed about their obligations in meeting the above commitments.
- 1790 • Maintain adequate and accurate records in accordance with §21 CFR 312.62 and to make those  
1791 records available for inspection with the Sponsor (or designee).
- 1792 • Ensure that an IRB that complies with the requirements of §21 CFR part 56 will be responsible for  
1793 initial and continuing review and approval of the clinical study.
- 1794 • Promptly report to the IRB and the Sponsor all changes in the research activity and all unanticipated  
1795 problems involving risks to subjects or others (to include amendments and IND safety reports).
- 1796 • Seek IRB and Sponsor approval before any changes are made in the research study, except when  
1797 necessary to eliminate hazards to the patients/subjects.
- 1798 • Comply with all other requirements regarding the obligations of clinical investigators and all other  
1799 pertinent requirements listed in § 21 CFR part 312.

1800 **16.2 Study Principal Investigator Responsibilities**

1801 The Study Principal Investigator is responsible for the conduct of the clinical trial, including overseeing that  
1802 sponsor responsibilities as defined in § 21 CFR 312. Subpart D are executed in accordance with federal  
1803 regulations.

1804 **16.3 Protocol Management Team (PMT)**

1805 The Protocol Management Team (PMT), minimally consisting of the study PI, collaborating investigators,  
1806 research nurse, clinical research associate/coordinator, and the study biostatistician, is responsible for  
1807 ongoing monitoring of the data and safety of this study, including implementation of the stopping rules for  
1808 safety/toxicity.

1809  
1810 The PMT is recommended to meet (in person or via teleconference) at least monthly to review study status.  
1811 This review will include, but not be limited to, reportable AEs and UPs, and an update of the ongoing study  
1812 summary that describes study progress in terms of the study schema. The meeting will be a forum to discuss  
1813 study related issues including accrual, SAE/AEs experienced, study response, deviations/violations and study  
1814 management issues. The appropriateness of further subject enrollment and the specific intervention for  
1815 subsequent subject enrollment are addressed. It is recommended that minutes of these discussions be  
1816 taken to document the date of these meetings, attendees and the issues that were discussed (in a general  
1817 format).

1818 **16.4 Monitoring**

1819 Clinical site monitoring is conducted to ensure that the rights of human subjects are protected, that the  
1820 study is implemented in accordance with the protocol and regulatory requirements, and that the quality and  
1821 integrity of study data and data collection methods are maintained. Monitoring for this study will be  
1822 performed by the City of Hope Office of Clinical Trials Auditing and Monitoring (OCTAM).

1823  
1824 The Investigator will permit the study monitors and appropriate regulatory authorities direct access to the  
1825 study data and to the corresponding source data and documents to verify the accuracy of this data. The  
1826 Investigator will allocate adequate time for such monitoring activities. The Investigator will also ensure that  
1827 the monitor or other compliance or quality assurance reviewer is given access to all the above noted study-  
1828 related documents and study related facilities (e.g. pharmacy, diagnostic laboratory, etc.), and has adequate  
1829 space to conduct the monitoring visit.

1830  
1831 Details of clinical site monitoring are documented in the OCTAM SOP. This document specifies the frequency  
1832 of monitoring, monitoring procedures, the level of clinical site monitoring activities (e.g., the percentage of  
1833 subject data to be reviewed), and the distribution of monitoring reports. Staff from OCTAM will conduct  
1834 monitoring activities and provide reports of the findings and associated action items in accordance with the  
1835 details described in the SOP. Documentation of monitoring activities and findings will be provided to the  
1836 study team, and the COH DSMC.

1837 **16.5 City of Hope Data and Safety Monitoring Committee**

1838 This is a risk level 4 study as defined in the [City of Hope Institutional Data and Safety Monitoring Plan](#). This  
1839 determination was made because the study involves an investigator initiated safety clinical trial.

1840  
1841 The DSMC is a multidisciplinary committee charged with overseeing the monitoring of safety of participants  
1842 in clinical trials, and the conduct, progress, validity, and integrity of the data for all clinical trials that are  
1843 sponsored by City of Hope. The committee is composed of clinical specialists with experience in oncology  
1844 and who have no direct relationship with the study. The committee reviews the progress and safety of all  
1845 active research protocols that are not monitored by another safety and data monitoring committee or  
1846 board.

1847  
1848 The Study Principal Investigator is required to submit periodic status reports (the PMT report) according to  
1849 the guidelines outlined in the [City of Hope Institutional Data and Safety Monitoring Plan](#). The PMT report  
1850 will be submitted to the COH DSMC quarterly from the date of activation.

1851  
1852 The COH Data and Safety Monitoring Committee (DSMC) will review and monitor toxicity and accrual data  
1853 from this trial. The DSMC will review up-to-date participant accrual; summary of all adverse events captured  
1854 via routine and expedited reporting; a summary of deviations; any response information; monitoring  
1855 reports, and summary comments provided by the study team. Other information (e.g. scans, laboratory  
1856 values) will be provided upon request. For Phase I studies, a Phase I Tracking Log will be utilized and  
1857 reviewed by the DSMC to monitor data and safety for dose escalation. A review of outcome results  
1858 (response, toxicity and adverse events) and factors external to the study (such as scientific or therapeutic  
1859 developments) is discussed, and the Committee votes on the status of each study. Information that raises  
1860 any questions about participant safety will be addressed with the Principal Investigator, statistician and  
1861 study team.

1862 **17.0 ETHICAL AND REGULATORY CONSIDERATIONS**

---

1863 **17.1 Ethical Standard**

1864 This study will be conducted in conformance with the principles set forth in The Belmont Report: Ethical  
1865 Principles and Guidelines for the Protection of Human Subjects of Research (US National Commission for the  
1866 Protection of Human Subjects of Biomedical and Behavioral Research, April 18, 1979) and the Declaration of  
1867 Helsinki.

1868 **17.2 Regulatory Compliance**

1869 This study is to be conducted in compliance with the IRB approved protocol and according to the following  
1870 considerations:

- 1871 ○ US Code of Federal Regulations (CFR) governing clinical study conduct
  - 1872 • Title 21 Part 11 – Electronic Records; Electronic Signatures
  - 1873 • Title 21 Part 50 – Protection of Human Subjects
  - 1874 • Title 21 Part 54 – Financial Disclosure by Clinical Investigators
  - 1875 • Title 21 Part 56 – Institutional Review Boards
  - 1876 • Title 21 Part 58 – Good Laboratory Practice for Nonclinical Laboratory Studies
  - 1877 • Title 21 Part 312 – Investigational New Drug Application
  - 1878 • Title 45 Part 46 – Protection of Human Subjects
- 1879 ○ US Federal legislation, including but not limited to
  - 1880 • Health Insurance Portability and Accountability Act of 1996
  - 1881 • Section 801 of the Food and Drug Administration Amendments Act
- 1882 ○ Applicable state and local laws. For research occurring in California, this includes but is not limited to  
1883 State of California Health and Safety Code, Title 17
- 1884 ○ Applicable, NIH policies and procedures
- 1885 ○ Applicable institutional research policies and procedures

1886 **17.3 Institutional Review Board**

1887 An Institutional Review Board (IRB) that complies with the federal regulations at 45 CFR 46 and 21 CFR 50,  
1888 56 and State of California Health and Safety code, Title 17, must review and approve this protocol, informed  
1889 consent form and any additional documents that the IRB may need to fulfill its responsibilities (Investigator’s  
1890 Brochure, information concerning patient recruitment, payment or compensation procedures, or other  
1891 pertinent information) prior to initiation of the study. Revisions to approved documents will require review  
1892 and approval by the IRB before the changes are implemented in the study. All institutional, NCI, Federal, and  
1893 State of California regulations must be fulfilled.

1894 The IRB’s written unconditional approval of the study protocol and the informed consent document must be  
1895 in the possession of the investigator before the study is initiated.

1896 The IRB will be informed of serious unexpected, unanticipated adverse experiences, and unanticipated  
1897 problems occurring during the study, and any additional adverse experiences in accordance with the  
1898 standard operating procedures and policies of the IRB; new information that may affect adversely the safety  
1899 of the patients of the conduct of the study; an annual update and/or request for re-approval; and when the  
1900 study has been completed.

1901 **17.4 Informed Consent**

1902 The Principal Investigator or IRB approved named designee will explain the nature, duration, purpose of the  
1903 study, potential risks, alternatives and potential benefits, and all other information contained in the  
1904 informed consent document. In addition, they will review the experimental subject’s bill of rights and the  
1905 HIPAA research authorization form. Prospective participants will be informed that they may withdraw from  
1906 the study at any time and for any reason without prejudice, including as applicable, their current or future

1907 care or employment at City of Hope or any relationship they have with City of Hope. Prospective  
1908 participants will be afforded sufficient time to consider whether or not to participate in the research.

1909 After the study has been fully explained, written informed consent will be obtained from either the  
1910 prospective participant or his/her guardian or legal representative before study participation. The method  
1911 of obtaining and documenting the informed consent and the contents of the consent must comply with the  
1912 ICH-GCP and all applicable regulatory requirements.

1913 A copy of the signed informed consent will be given to the participant or his/her legally authorized  
1914 representative. The original signed consent must be maintained by the investigator and available for  
1915 inspection by sponsor designated representatives, or regulatory authority at any time.

1916 Informed consent is a process that is initiated prior to the individual agreeing to participate in the study and  
1917 continues throughout study participation.

## 1918 **17.5 Participant Withdrawal**

1919 Participants may withdraw from the study at any time and for any reason without prejudice. The withdrawal  
1920 must be documented per institutional policies. The COH DCC should be promptly notified of the change in  
1921 participant status.

1922 Participant withdrawal may consist of any of the following with regard to study procedures and data  
1923 collection:

- 1924 ○ Withdrawal from study treatment, but agreement to continue with active study procedures and  
1925 chart review and survival follow-up.
- 1926 ○ Withdrawal from study treatment and all active procedures, but agreement for chart review and  
1927 survival follow-up.
- 1928 ○ Withdrawal from study treatment, all active procedures, and any future data collection.

1929 Participants who agreed to the collection of research blood samples may withdraw consent to use their  
1930 specimens, if they are not yet processed as detailed in the consent form. Once the PI and site PI is notified  
1931 of this withdrawal of informed consent, the research specimens will not be used in any research. At that  
1932 time, any of the existing specimens will be destroyed.

## 1933 **17.6 Special and Vulnerable Populations**

### 1934 **17.6.1 Women and Minorities**

1935 The study is open to anyone regardless of gender, race or ethnicity. Efforts will be made to extend the  
1936 accrual to a representative population. If differences in outcome that correlate to gender, racial, or ethnic  
1937 identity are noted, accrual may be expanded or additional studies may be performed to investigate those  
1938 differences more fully.

1939 Pregnant women are excluded because the study drugs may potentially affect the developing fetus.

### 1940 **17.6.2 Pediatric Population**

1941 Pediatric participants (< 18 years of age) are excluded from this study since safety and effectiveness of  
1942 protocol therapy has not yet been defined for the study population. Additional studies may be performed in  
1943 the pediatric population once safety and effectiveness of protocol therapy is defined in the adult study  
1944 population.

### 1945 **17.6.3 HIV Positive Individuals**

1946 Participants with HIV are excluded due to concerns about inadvertent augmentation of infectious and/or  
1947 inflammatory activity.



1948 **17.6.4 Vulnerable Populations**

1949 Per 45 CFR §46.111 (a)(3) and 45 CFR §46, Subparts B-D identifies children, prisoners, pregnant women,  
1950 mentally incapacitated persons, and economically or educationally disadvantaged persons as vulnerable  
1951 populations.

1952 Economically/educationally disadvantaged persons are not actively targeted for participation, nor are they  
1953 excluded from participation. This study does not pose additional risks for economically/educationally  
1954 disadvantaged persons than for the general population.

1955 **17.7 Participant Confidentiality**

1956 Participant confidentiality is strictly held in trust by the investigators, study staff, and the sponsor(s) and  
1957 their agents. This confidentiality is extended to cover testing of biological samples in addition to any study  
1958 information relating to participants.

1959 This research will be conducted in compliance with federal and state requirements relating to protected  
1960 health information (PHI), including the requirements of the Health Insurance Portability and Accountability  
1961 Act of 1996 (HIPAA). HIPAA regulations require a signed subject authorization informing the subject of the  
1962 nature of the PHI to be collected, who will have access to that information and why, who will use or disclose  
1963 that information, and the rights of a research participant to revoke their authorization for use of their PHI. In  
1964 the event that a subject revokes authorization to collect or use PHI, the investigator, by regulation, retains  
1965 the ability to use all information collected prior to the revocation of subject authorization. For subjects that  
1966 have revoked authorization to collect or use PHI, attempts should be made to obtain permission to collect at  
1967 least vital status (i.e. that the subject is alive) at the end of their scheduled study period.

1968 Release of research results should preserve the privacy of medical information and must be carried out in  
1969 accordance with Department of Health and Human Services Standards for Privacy of Individually Identifiable  
1970 Health Information, 45 CFR 164.508. When results of this study are reported in medical journals or at  
1971 meetings, identification of those taking part will not be disclosed and no identifiers will be used.

1972 Medical records of subjects will be securely maintained in the strictest confidence, according to current legal  
1973 requirements. Data will be entered, analyzed and stored in encrypted, password protected, secure  
1974 computers that meet all HIPAA requirements. All data capture records, drug accountability records, study  
1975 reports and communications will identify the patient by initials and the assigned patient number.

1976 The investigator/institution will permit direct access to source data and documents by sponsor  
1977 representatives, the FDA, and other applicable regulatory authorities. The access may consist of trial-  
1978 related monitoring, including remote monitoring, audits, IRB/IEC reviews, and FDA/regulatory authority  
1979 inspections. The patient's confidentiality will be maintained and will not be made publicly available to the  
1980 extent permitted by the applicable laws and regulations.

1981 Participant specimens with a limited data set will be provided to collaborating laboratories. The specimens  
1982 will be labeled with the study number, subject (accession) ID, date and time point of collection. The key to  
1983 the code will be maintained in the COH clinical trials management system which is a secure environment.

1984 **17.8 Use of Unused (Leftover) Specimens Collected for this Trial**

1985 Unused samples in existence at study completion (i.e. completion of all research activities under this study)  
1986 will either be: (a) placed in a COH IRB approved biorepository with some clinical information and potentially  
1987 PHI attached or (b) discarded.

1988 **17.9 Conflict of Interest**

1989 Any investigator who has a conflict of interest with this study (patent ownership, royalties, or financial gain  
1990 greater than the minimum allowable by their institution, etc.) must have the conflict reviewed by a properly  
1991 constituted Conflict of Interest Committee with a Committee-sanctioned conflict management plan that has  
1992 been reviewed and approved by the study Sponsor (City of Hope) prior to participation in this study. All City  
1993 of Hope investigators will follow the City of Hope conflict of interest policy.

1994 **17.10 Financial Obligations, Compensation, and Reimbursement of Participants**

1995 Regorafenib, ipilimumab and nivolumab will be provided free of charge to participants.

1996 Neither the research participant nor the insurance carrier will be responsible for the research procedures  
1997 related to this study.

1998 Standard of care drugs or procedures provided during the course of study participation will be the  
1999 responsibility of the research participant and/or the insurance carrier. The participant will be responsible for  
2000 all copayments, deductibles, and other costs of treatment and diagnostic procedures as set forth by the  
2001 insurance carrier. The participant and/or the insurance carrier will be billed for the costs of treatment and  
2002 diagnostic procedures in the same way as if the participant were not in a research study.

2003 In the event of physical injury to a participant resulting from research procedures, appropriate medical  
2004 treatment will be available at City of Hope to the injured participant. There are no plans for City of Hope to  
2005 provide financial compensation in the event of physical injury to a participant.

2006 The research participant will not receive reimbursement or payment for taking part in this study.

2007 **17.11 Publication/ Data Sharing**

2008 Neither the complete nor any part of the results of the study carried out under this protocol, nor any of the  
2009 information provided by City of Hope for the purposes of performing the study, will be published or passed  
2010 on to any third party without the written approval of the Study PI. Any investigator involved with this study  
2011 is obligated to provide City of Hope with complete test results and all data derived from the study.

2012 The preparation and submittal for publication of manuscripts containing the study results shall be in  
2013 accordance with a process determined by mutual written agreement between City of Hope and BMS. The  
2014 publication or presentation of any study results shall comply with all applicable privacy laws, including, but  
2015 not limited to, the Health Insurance Portability and Accountability Act of 1996.

2016 In accordance with the [U.S. Public Law 110-85](#) (Food and Drug Administration Amendments Act of 2007 or  
2017 FDAAA), Title VIII, Section 801, this trial will be registered onto [ClinicalTrials.gov](#). Results will be reported on  
2018 [ClinicalTrials.gov](#) generally within 12 months after the completion date unless criteria to delay submission  
2019 are met per the final rule.

2020

2021 **18.0 REFERENCES**

---

2022

- 2023 1. Fakhri, M.G., *Metastatic colorectal cancer: current state and future directions*. J Clin Oncol, 2015. **33**(16): p. 1809-24.
- 2024 2. Sandhu, J., V. Lavingia, and M. Fakhri, *Systemic treatment for metastatic colorectal cancer in the era of precision medicine*. J Surg Oncol, 2019. **119**(5): p. 564-582.
- 2025 3. Ciombor, K.K., C. Wu, and R.M. Goldberg, *Recent therapeutic advances in the treatment of colorectal cancer*. Annu Rev Med, 2015. **66**: p. 83-95.
- 2026 4. Tournigand, C., et al., *FOLFIRI followed by FOLFOX6 or the reverse sequence in advanced colorectal cancer: a randomized GERCOR study*. J Clin Oncol, 2004. **22**(2): p. 229-37.
- 2027 5. Yoshino, T., et al., *Pan-Asian adapted ESMO consensus guidelines for the management of patients with metastatic colorectal cancer: a JSMO-ESMO initiative endorsed by CSCO, KACO, MOS, SSO and TOS*. Ann Oncol, 2018. **29**(1): p. 44-70.
- 2028 6. Bekaii-Saab, T., et al., *Third- or Later-line Therapy for Metastatic Colorectal Cancer: Reviewing Best Practice*. Clin Colorectal Cancer, 2019. **18**(1): p. e117-e129.
- 2029 7. Grothey, A., et al., *Regorafenib monotherapy for previously treated metastatic colorectal cancer (CORRECT): an international, multicentre, randomised, placebo-controlled, phase 3 trial*. Lancet, 2013. **381**(9863): p. 303-12.
- 2030 8. Mayer, R.J., et al., *Randomized trial of TAS-102 for refractory metastatic colorectal cancer*. N Engl J Med, 2015. **372**(20): p. 1909-19.
- 2031 9. Lloza, N.J., et al., *The vigorous immune microenvironment of microsatellite instable colon cancer is balanced by multiple counter-inhibitory checkpoints*. Cancer Discov, 2015. **5**(1): p. 43-51.
- 2032 10. Le, D.T., et al., *PD-1 Blockade in Tumors with Mismatch-Repair Deficiency*. N Engl J Med, 2015. **372**(26): p. 2509-20.
- 2033 11. Curran, M.A., et al., *PD-1 and CTLA-4 combination blockade expands infiltrating T cells and reduces regulatory T and myeloid cells within B16 melanoma tumors*. Proc Natl Acad Sci U S A, 2010. **107**(9): p. 4275-80.
- 2034 12. Larkin, J., F.S. Hodi, and J.D. Wolchok, *Combined Nivolumab and Ipilimumab or Monotherapy in Untreated Melanoma*. N Engl J Med, 2015. **373**(13): p. 1270-1.
- 2035 13. Overman, M.J., et al., *Nivolumab in patients with metastatic DNA mismatch repair-deficient or microsatellite instability-high colorectal cancer (CheckMate 142): an open-label, multicentre, phase 2 study*. Lancet Oncol, 2017. **18**(9): p. 1182-1191.
- 2036 14. Overman, M.J., et al., *Durable Clinical Benefit With Nivolumab Plus Ipilimumab in DNA Mismatch Repair-Deficient/Microsatellite Instability-High Metastatic Colorectal Cancer*. J Clin Oncol, 2018. **36**(8): p. 773-779.
- 2037 15. Lenz, H.-J.J., et al., *LBA18\_PR Durable clinical benefit with nivolumab (NIVO) plus low-dose ipilimumab (IPI) as first-line therapy in microsatellite instability-high/mismatch repair deficient (MSI-H/dMMR) metastatic colorectal cancer (mCRC)*. Annals of Oncology, 2018. **29**(suppl\_8).
- 2038 16. O'Neil, B.H., et al., *Safety and antitumor activity of the anti-PD-1 antibody pembrolizumab in patients with advanced colorectal carcinoma*. PLoS One, 2017. **12**(12): p. e0189848.
- 2039 17. Eng, C., et al., *Atezolizumab with or without cobimetinib versus regorafenib in previously treated metastatic colorectal cancer (IMblaze370): a multicentre, open-label, phase 3, randomised, controlled trial*. Lancet Oncol, 2019. **20**(6): p. 849-861.
- 2040 18. Chen, E.X., et al., *CCTG CO.26 trial: A phase II randomized study of durvalumab (D) plus tremelimumab (T) and best supportive care (BSC) versus BSC alone in patients (pts) with advanced refractory colorectal carcinoma (rCRC)*. Journal of Clinical Oncology, 2019. **37**(4\_suppl): p. 481-481.
- 2041 19. Twyman-Saint Victor, C., et al., *Radiation and dual checkpoint blockade activate non-redundant immune mechanisms in cancer*. Nature, 2015. **520**(7547): p. 373-7.
- 2042 20. Hoff, S., et al., *Immunomodulation by regorafenib alone and in combination with anti PD1 antibody on murine models of colorectal cancer*. Ann Oncol, 2017. **28**(suppl\_5).
- 2043 21. Wu, R.Y., et al., *Regorafenib Promotes Antitumor Immunity via Inhibiting PD-L1 and IDO1 Expression in Melanoma*. Clin Cancer Res, 2019. **25**(14): p. 4530-4541.
- 2044 22. Zopf, D., et al., *Pharmacologic activity and pharmacokinetics of metabolites of regorafenib in preclinical models*. Cancer Med, 2016. **5**(11): p. 3176-3185.
- 2071
- 2072

- 2073 23. Fukuoka, S., et al., *Regorafenib plus nivolumab in patients with advanced gastric (GC) or colorectal cancer (CRC): An open-label, dose-finding, and dose-expansion phase 1b trial (REGONIVO, EPOC1603)*. J Clin Oncol, 2019. **37:15\_suppl, 2522-2522**
- 2074
- 2075
- 2076 24. Schrock, A.B., et al., *Tumor mutational burden is predictive of response to immune checkpoint inhibitors in MSI-high metastatic colorectal cancer*. Ann Oncol, 2019.
- 2077
- 2078 25. Lenz, H.-J., et al., *Durable clinical benefit with nivolumab (NIVO) plus low-dose ipilimumab (IPI) as first-line therapy in microsatellite instability-high/mismatch repair deficient (MSI-H/dMMR) metastatic colorectal cancer (mCRC)*. Ann Oncol, 2018. **Volume 29, Issue suppl\_8**.
- 2079
- 2080
- 2081 26. Piantadosi, S., *Clinical Trials, a Methodological Perspective (section 6.4.3)*. Wiley. 2006.
- 2082 27. Fukuoka, S., et al., *Regorafenib plus nivolumab in patients with advanced gastric (GC) or colorectal cancer (CRC): An open-label, dose-finding, and dose-expansion phase 1b trial (REGONIVO, EPOC1603)*. Journal of Clinical Oncology, 2019. **37(15\_suppl)**: p. 2522-2522.
- 2083
- 2084
- 2085 28. Oken, M.M., et al., *Toxicity and response criteria of the Eastern Cooperative Oncology Group*. Am J Clin Oncol, 1982. **5(6)**: p. 649-55.
- 2086
- 2087 29. Eisenhauer, E.A., et al., *New response evaluation criteria in solid tumours: revised RECIST guideline (version 1.1)*. Eur J Cancer, 2009. **45(2)**: p. 228-47.
- 2088
- 2089 30. Hodi, F.S., et al., *Evaluation of Immune-Related Response Criteria and RECIST v1.1 in Patients With Advanced Melanoma Treated With Pembrolizumab*. Journal of Clinical Oncology, 2016.
- 2090
- 2091 31. Dolgin, M., et al., *Nomenclature and Criteria for Diagnosis of Diseases of the Heart and Great Vessels*. 9 edn (Boston, Little, Brown and Company). 1994.
- 2092
- 2093
- 2094
- 2095

2096 **19.0 APPENDIX A: ECOG PERFORMANCE STATUS**

---

2097

| ECOG Performance Scale[28] |                                                                                                                                                                                       |
|----------------------------|---------------------------------------------------------------------------------------------------------------------------------------------------------------------------------------|
| Grade                      | Descriptions                                                                                                                                                                          |
| 0                          | Normal activity. Fully active, able to carry on all pre-disease performance without restriction.                                                                                      |
| 1                          | Symptoms, but ambulatory. Restricted in physically strenuous activity, but ambulatory and able to carry out work of a light or sedentary nature (e.g., light housework, office work). |
| 2                          | In bed <50% of the time. Ambulatory and capable of all self-care, but unable to carry out any work activities. Up and about more than 50% of waking hours.                            |
| 3                          | In bed >50% of the time. Capable of only limited self-care, confined to bed or chair more than 50% of waking hours.                                                                   |
| 4                          | 100% bedridden. Completely disabled. Cannot carry on any self-care. Totally confined to bed or chair.                                                                                 |
| 5                          | Dead.                                                                                                                                                                                 |

2098

2099

2100 **20.0 APPENDIX B: CONTRACEPTION GUIDELINES**

---

2101 For this trial, male subjects will be considered to be of non-reproductive potential if they have azoospermia (whether  
2102 due to having had a vasectomy or due to an underlying medical condition).

2103 Female subjects will be considered of non-reproductive potential if they are either:

- 2104 • Postmenopausal (defined as at least 12 months with no menses without an alternative medical cause; in  
2105 women < 45 years of age a high follicle stimulating hormone (FSH) level in the postmenopausal range may be  
2106 used to confirm a post-menopausal state in women not using hormonal contraception or hormonal  
2107 replacement therapy. In the absence of 12 months of amenorrhea, a single FSH measurement is insufficient.);  
2108 **OR**  
2109 • Have had a hysterectomy and/or bilateral oophorectomy, bilateral salpingectomy or bilateral tubal  
2110 ligation/occlusion, at least 6 weeks prior to screening; **OR**  
2111 Has a congenital or acquired condition that prevents childbearing.

2112 Female and male subjects of reproductive potential must agree to avoid becoming pregnant or impregnating a partner,  
2113 respectively, while receiving study drug and for 120 days after the last dose of study drug by complying with one of the  
2114 following:

- 2115 1. Practice abstinence<sup>†</sup> from heterosexual activity; **OR**  
2116 2. Use (or have their partner use) acceptable contraception during heterosexual activity.

Single method (one of the following is acceptable):      Combination method (requires use of two of the following):

- |                                                |                                                                                                                                                                                                   |
|------------------------------------------------|---------------------------------------------------------------------------------------------------------------------------------------------------------------------------------------------------|
| ○ intrauterine device (IUD)                    | ○ diaphragm with spermicide (cannot be used in conjunction with cervical cap/spermicide)                                                                                                          |
| ○ vasectomy of a female subject's male partner | ○ cervical cap with spermicide (nulliparous women only)                                                                                                                                           |
| ○ contraceptive rod implanted into the skin    | ○ contraceptive sponge (nulliparous women only)                                                                                                                                                   |
|                                                | ○ male condom or female condom (cannot be used together)                                                                                                                                          |
|                                                | ○ hormonal contraceptive: oral contraceptive pill (estrogen/progestin pill or progestin-only pill), contraceptive skin patch, vaginal contraceptive ring, or subcutaneous contraceptive injection |

2117 †Abstinence (relative to heterosexual activity) can be used as the sole method of contraception if it is consistently  
2118 employed as the subject's preferred and usual lifestyle and if considered acceptable by local regulatory agencies and  
2119 ERCs/IRBs. Periodic abstinence (e.g., calendar, ovulation, sympto-thermal, post-ovulation methods, etc.) and  
2120 withdrawal are not acceptable methods of contraception.

2121 ‡If a contraceptive method listed above is restricted by local regulations/guidelines, then it does not qualify as an  
2122 acceptable method of contraception for subjects participating at sites in this country/region.

2123 Subjects should be informed that taking the study medication may involve unknown risks to the fetus (unborn baby) if  
2124 pregnancy were to occur during the study. In order to participate in the study subjects of childbearing potential must  
2125 adhere to the contraception requirement (described above) from the day of study medication initiation (or 14 days  
2126 prior to the initiation of study medication for oral contraception) throughout the study period up to 120 days after the  
2127 last dose of trial therapy. If there is any question that a subject of childbearing potential will not reliably comply with  
2128 the requirements for contraception, that subject should not be entered into the study.

## 2129 **21.0 APPENDIX C: RECIST V 1.1 RESPONSE CRITERIA**

---

2130 Based on Eisenhauer et al., 2009.[29]

### 2131 ○ **Measurable disease**

2132 Measurable lesions are defined as those that can be accurately measured in at least one  
2133 dimension (longest diameter to be recorded) as  $\geq 20$  mm by chest x-ray, as  $\geq 10$  mm with CT  
2134 scan, or  $\geq 10$  mm with calipers by clinical exam. All tumor measurements must be recorded in  
2135 millimeters (or decimal fractions of centimeters).

2136 Note: Tumor lesions that are situated in a previously irradiated area might or might not be  
2137 considered measurable. *If the investigator thinks it appropriate to include them, the conditions*  
2138 *under which such lesions should be considered must be defined in the protocol.*

### 2139 ○ **Malignant lymph nodes**

2140 To be considered pathologically enlarged and measurable, a lymph node must be  $\geq 15$  mm in  
2141 short axis when assessed by CT scan (CT scan slice thickness recommended to be no greater  
2142 than 5 mm). At baseline and in follow-up, only the short axis will be measured and followed.

### 2143 ○ **Non-measurable disease**

2144 All other lesions (or sites of disease), including small lesions (longest diameter  $< 10$  mm or  
2145 pathological lymph nodes with  $\geq 10$  to  $< 15$  mm short axis), are considered non-measurable  
2146 disease. Bone lesions, leptomeningeal disease, ascites, pleural/pericardial effusions,  
2147 lymphangitis cutis/pulmonitis, inflammatory breast disease, and abdominal masses (not  
2148 followed by CT or MRI), are considered as non-measurable.

2149 Note: Cystic lesions that meet the criteria for radiographically defined simple cysts should not  
2150 be considered as malignant lesions (neither measurable nor non-measurable) since they are, by  
2151 definition, simple cysts.

2152 ‘Cystic lesions’ thought to represent cystic metastases can be considered as measurable lesions,  
2153 if they meet the definition of measurability described above. However, if non-cystic lesions are  
2154 present in the same patient, these are preferred for selection as target lesions.

### 2155 ○ **Target lesions**

2156 All measurable lesions up to a maximum of 2 lesions per organ and 5 lesions in total,  
2157 representative of all involved organs, should be identified as target lesions and recorded and  
2158 measured at baseline. Target lesions should be selected on the basis of their size (lesions with  
2159 the longest diameter), be representative of all involved organs, but in addition should be those  
2160 that lend themselves to reproducible repeated measurements. It may be the case that, on  
2161 occasion, the largest lesion does not lend itself to reproducible measurement in which  
2162 circumstance the next largest lesion which can be measured reproducibly should be selected. A  
2163 sum of the diameters (longest for non-nodal lesions, short axis for nodal lesions) for all target  
2164 lesions will be calculated and reported as the baseline sum diameters. If lymph nodes are to be  
2165 included in the sum, then only the short axis is added into the sum. The baseline sum  
2166 diameters will be used as reference to further characterize any objective tumor regression in  
2167 the measurable dimension of the disease.

### 2168 ○ **Non-target lesions**

2169 All other lesions (or sites of disease) including any measurable lesions over and above the 5  
2170 target lesions should be identified as **non-target lesions** and should also be recorded at  
2171 baseline. Measurements of these lesions are not required, but the presence, absence, or in  
2172 rare cases unequivocal progression of each should be noted throughout follow-up.

## 2173 **Methods for Evaluation of Measurable Disease**

2174 All measurements should be taken and recorded in metric notation using a ruler or calipers. All baseline  
2175 evaluations should be performed as closely as possible to the beginning of treatment and never more than 4  
2176 weeks before the beginning of the treatment.

2177 The same method of assessment and the same technique should be used to characterize each identified and  
2178 reported lesion at baseline and during follow-up. Imaging-based evaluation is preferred to evaluation by  
2179 clinical examination unless the lesion(s) being followed cannot be imaged but are assessable by clinical  
2180 exam.

2181 ○ **Clinical lesions**

2182 Clinical lesions will only be considered measurable when they are superficial (e.g., skin nodules  
2183 and palpable lymph nodes) and  $\geq 10$  mm diameter as assessed using calipers (e.g., skin  
2184 nodules). In the case of skin lesions, documentation by color photography, including a ruler to  
2185 estimate the size of the lesion, is recommended.

2186 ○ **Chest x-ray**

2187 Lesions on chest x-ray are acceptable as measurable lesions when they are clearly defined and  
2188 surrounded by aerated lung. However, CT is preferable.

2189 ○ **Conventional CT and MRI**

2190 This guideline has defined measurability of lesions on CT scan based on the assumption that CT  
2191 slice thickness is 5 mm or less. If CT scans have slice thickness greater than 5 mm, the minimum  
2192 size for a measurable lesion should be twice the slice thickness. MRI is also acceptable in  
2193 certain situations (e.g. for body scans).

2194 Use of MRI remains a complex issue. MRI has excellent contrast, spatial, and temporal  
2195 resolution; however, there are many image acquisition variables involved in MRI, which greatly  
2196 impact image quality, lesion conspicuity, and measurement. Furthermore, the availability of  
2197 MRI is variable globally. As with CT, if an MRI is performed, the technical specifications of the  
2198 scanning sequences used should be optimized for the evaluation of the type and site of disease.  
2199 Furthermore, as with CT, the modality used at follow-up should be the same as was used at  
2200 baseline and the lesions should be measured/assessed on the same pulse sequence. It is  
2201 beyond the scope of the RECIST guidelines to prescribe specific MRI pulse sequence parameters  
2202 for all scanners, body parts, and diseases. Ideally, the same type of scanner should be used and  
2203 the image acquisition protocol should be followed as closely as possible to prior scans. Body  
2204 scans should be performed with breath-hold scanning techniques, if possible.

2205 ○ **PET-CT**

2206 At present, the low dose or attenuation correction CT portion of a combined PET-CT is not  
2207 always of optimal diagnostic CT quality for use with RECIST measurements. However, if the site  
2208 can document that the CT performed as part of a PET-CT is of identical diagnostic quality to a  
2209 diagnostic CT (with IV and oral contrast), then the CT portion of the PET-CT can be used for  
2210 RECIST measurements and can be used interchangeably with conventional CT in accurately  
2211 measuring cancer lesions over time. Note, however, that the PET portion of the CT introduces  
2212 additional data which may bias an investigator if it is not routinely or serially performed.

2213 ○ **Ultrasound**

2214 Ultrasound is not useful in assessment of lesion size and should not be used as a method of  
2215 measurement. Ultrasound examinations cannot be reproduced in their entirety for  
2216 independent review at a later date and, because they are operator dependent, it cannot be  
2217 guaranteed that the same technique and measurements will be taken from one assessment to  
2218 the next. If new lesions are identified by ultrasound in the course of the study, confirmation by  
2219 CT or MRI is advised. If there is concern about radiation exposure at CT, MRI may be used  
2220 instead of CT in selected instances.

2221 ○ **Endoscopy, Laparoscopy**



2222 The utilization of these techniques for objective tumor evaluation is not advised. However,  
 2223 such techniques may be useful to confirm complete pathological response when biopsies are  
 2224 obtained or to determine relapse in trials where recurrence following complete response (CR)  
 2225 or surgical resection is an endpoint.

2226 ○ **Tumor markers**

2227 Tumor markers alone cannot be used to assess response. If markers are initially above the  
 2228 upper normal limit, they must normalize for a patient to be considered in complete clinical  
 2229 response. Specific guidelines for both CA-125 response (in recurrent ovarian cancer) and PSA  
 2230 response (in recurrent prostate cancer) have been published [JNCI 96:487-488, 2004; J  
 2231 ClinOncol 17, 3461-3467, 1999; J ClinOncol 26:1148-1159, 2008]. In addition, the Gynecologic  
 2232 Cancer Intergroup has developed CA-125 progression criteria which are to be integrated with  
 2233 objective tumor assessment for use in first-line trials in ovarian cancer [JNCI 92:1534-1535,  
 2234 2000].

2235 ○ **Cytology, Histology**

2236 These techniques can be used to differentiate between partial responses (PR) and complete  
 2237 responses (CR) in rare cases (e.g., residual lesions in tumor types, such as germ cell tumors,  
 2238 where known residual benign tumors can remain).

2239 The cytological confirmation of the neoplastic origin of any effusion that appears or worsens  
 2240 during treatment when the measurable tumor has met criteria for response or stable disease is  
 2241 mandatory to differentiate between response or stable disease (an effusion may be a side  
 2242 effect of the treatment) and progressive disease.

2243 ○ **FDG-PET**

2244 While FDG-PET response assessments need additional study, it is sometimes reasonable to  
 2245 incorporate the use of FDG-PET scanning to complement CT scanning in assessment of  
 2246 progression (particularly possible 'new' disease). New lesions on the basis of FDG-PET imaging  
 2247 can be identified according to the following algorithm:

- 2248 – Negative FDG-PET at baseline, with a positive FDG-PET at follow-up is a sign of PD based  
 2249 on a new lesion.
- 2250 – No FDG-PET at baseline and a positive FDG-PET at follow-up: If the positive FDG-PET at  
 2251 follow-up corresponds to a new site of disease confirmed by CT, this is PD. If the  
 2252 positive FDG-PET at follow-up is not confirmed as a new site of disease on CT, additional  
 2253 follow-up CT scans are needed to determine if there is truly progression occurring at  
 2254 that site (if so, the date of PD will be the date of the initial abnormal FDG-PET scan). If  
 2255 the positive FDG-PET at follow-up corresponds to a pre-existing site of disease on CT  
 2256 that is not progressing on the basis of the anatomic images, this is not PD.
- 2257 – FDG-PET may be used to upgrade a response to a CR in a manner similar to a biopsy in  
 2258 cases where a residual radiographic abnormality is thought to represent fibrosis or  
 2259 scarring. The use of FDG-PET in this circumstance should be prospectively described in  
 2260 the protocol and supported by disease-specific medical literature for the indication.  
 2261 However, it must be acknowledged that both approaches may lead to false positive CR  
 2262 due to limitations of FDG-PET and biopsy resolution/sensitivity.

2263 Note: A 'positive' FDG-PET scan lesion means one which is FDG avid with an uptake greater  
 2264 than twice that of the surrounding tissue on the attenuation corrected image.

2265 **Evaluation of Target Lesions**

|                                 |                                                                                                                                               |
|---------------------------------|-----------------------------------------------------------------------------------------------------------------------------------------------|
| <i>Complete Response (CR)</i>   | Disappearance of all target lesions. Any pathological lymph nodes (whether target or non-target) must have reduction in short axis to <10 mm. |
| <i>Partial Response (PR)</i>    | At least a 30% decrease in the sum of the diameters of target lesions, taking as reference the baseline sum diameters                         |
| <i>Progressive Disease (PD)</i> | At least a 20% increase in the sum of the diameters of target lesions, taking as                                                              |

|                            |                                                                                                                                                                                                                                                                                                             |
|----------------------------|-------------------------------------------------------------------------------------------------------------------------------------------------------------------------------------------------------------------------------------------------------------------------------------------------------------|
|                            | reference the smallest sum on study (this includes the baseline sum if that is the smallest on study). In addition to the relative increase of 20%, the sum must also demonstrate an absolute increase of at least 5 mm. (Note: the appearance of one or more new lesions is also considered progressions). |
| <i>Stable Disease (SD)</i> | Neither sufficient shrinkage to qualify for PR nor sufficient increase to qualify for PD, taking as reference the smallest sum diameters while on study                                                                                                                                                     |

2266 **Evaluation of Non-Target Lesions**

|                                 |                                                                                                                                                                                                                                                                                                               |
|---------------------------------|---------------------------------------------------------------------------------------------------------------------------------------------------------------------------------------------------------------------------------------------------------------------------------------------------------------|
| <i>Complete Response (CR)</i>   | Disappearance of all non-target lesions and normalization of tumor marker level. All lymph nodes must be non-pathological in size (<10 mm short axis)<br>Note: If tumor markers are initially above the upper normal limit, they must normalize for a patient to be considered in complete clinical response. |
| <i>Non-CR/Non-PD</i>            | Persistence of one or more non-target lesion(s) and/or maintenance of tumor marker level above the normal limits.                                                                                                                                                                                             |
| <i>Progressive Disease (PD)</i> | Appearance of one or more new lesions and/or unequivocal progression of existing non-target lesions. Unequivocal progression should not normally trump target lesion status. It must be representative of overall disease status change, not a single lesion increase.                                        |

2267 Although a clear progression of “non-target” lesions only is exceptional, the opinion of the treating  
 2268 physician should prevail in such circumstances, and the progression status should be confirmed at a  
 2269 later time by the review panel (or Principal Investigator).

2270

2271 **Evaluation of Best Overall Response**

2272 The best overall response is the best response recorded from the start of the treatment until disease  
 2273 progression/recurrence (taking as reference for progressive disease the smallest measurements  
 2274 recorded since the treatment started). The patient's best response assignment will depend on the  
 2275 achievement of both measurement and confirmation criteria.

2276 **For Patients with Measurable Disease (i.e., Target Disease)**

| Target Lesions | Non-Target Lesions          | New Lesions | Overall Response | Best Overall Response when Confirmation is Required* |
|----------------|-----------------------------|-------------|------------------|------------------------------------------------------|
| CR             | CR                          | No          | CR               | >4 wks. Confirmation**                               |
| CR             | Non-CR/Non-PD               | No          | PR               | >4 wks. Confirmation**                               |
| CR             | Not evaluated               | No          | PR               |                                                      |
| PR             | Non-CR/Non-PD/not evaluated | No          | PR               |                                                      |
| SD             | Non-CR/Non-PD/not evaluated | No          | SD               | Documented at least once >4 wks. from baseline**     |
| PD             | Any                         | Yes or No   | PD               | no prior SD, PR or CR                                |
| Any            | PD***                       | Yes or No   | PD               |                                                      |
| Any            | Any                         | Yes         | PD               |                                                      |

\* See RECIST 1.1 manuscript for further details on what is evidence of a new lesion.  
 \*\* Only for non-randomized trials with response as primary endpoint.  
 \*\*\* In exceptional circumstances, unequivocal progression in non-target lesions may be accepted as disease progression.  
 Note: Patients with a global deterioration of health status requiring discontinuation of treatment without objective evidence of disease progression at that time should be reported as “symptomatic deterioration.” Every effort should be made to document the objective progression even after discontinuation of treatment.

2277

2278

2279 **For Patients with Non-Measurable Disease (i.e., Non-Target Disease)**

| Non-Target Lesions | New Lesions | Overall Response |
|--------------------|-------------|------------------|
| CR                 | No          | CR               |
| Non-CR/non-PD      | No          | Non-CR/non-PD*   |
| Not all evaluated  | No          | not evaluated    |
| Unequivocal PD     | Yes or No   | PD               |
| Any                | Yes         | PD               |

\* 'Non-CR/non-PD' is preferred over 'stable disease' for non-target disease since SD is increasingly used as an endpoint for assessment of efficacy in some trials so to assign this category when no lesions can be measured is not advised

2280

2281

2282 **Duration of Response**

|                                     |                                                                                                                                                                                                                                                                                                                                                                                                                                                                                                                             |
|-------------------------------------|-----------------------------------------------------------------------------------------------------------------------------------------------------------------------------------------------------------------------------------------------------------------------------------------------------------------------------------------------------------------------------------------------------------------------------------------------------------------------------------------------------------------------------|
| <i>Duration of overall response</i> | <p>The duration of overall response is measured from the time measurement criteria are met for CR or PR (whichever is first recorded) until the first date that recurrent or progressive disease is objectively documented (taking as reference for progressive disease the smallest measurements recorded since the treatment started).</p> <p>The duration of overall CR is measured from the time measurement criteria are first met for CR until the first date that progressive disease is objectively documented.</p> |
| <i>Duration of stable disease</i>   | <p>Stable disease is measured from the start of the treatment until the criteria for progression are met, taking as reference the smallest measurements recorded since the treatment started, including the baseline measurements.</p>                                                                                                                                                                                                                                                                                      |

2283

2284

2285

2286

2287

2288

2289

2290

2291

2292

2293

2294

2295

2296

2297

2298

2299

2300

2301

2302

2303

2304 **22.0 APPENDIX D: IMMUNE RELATED RESPONSE CRITERIA**

2305 Immune related RECIST (irRECIST) is an adaptation of RECIST 1.1 to account for the unique tumor response  
 2306 characteristics to treatment with new immunotherapeutic agents, including ipilimumab and nivolumab.  
 2307 RECIST 1.1 was developed based on treatment with cytotoxic agents. Immunotherapeutic drugs, such as  
 2308 ipilimumab and nivolumab, may produce antitumor effects by potentiating endogenous cancer-specific  
 2309 immune responses. The response patterns seen with such an approach may extend beyond the typical time  
 2310 course of responses seen with cytotoxic agents, and can manifest as clinical responses after initial increases  
 2311 in tumor burden or even the appearance of new lesions. Standard RECIST 1.1 may not provide an accurate  
 2312 assessment of response to immunotherapeutic agents such as pembrolizumab[30], and will therefore be  
 2313 used with the adaptations referred to as irRECIST.

2314 **Antitumor response based on total measurable tumor burden**

2315 For the irRECIST, only index and measurable new lesions are taken into account (in contrast to conventional  
 2316 WHO criteria, which do not require the measurement of new lesions, nor do they include new lesion  
 2317 measurements in the characterization of evolving tumor burden). At the baseline tumor assessment, the  
 2318 sum of the products of the two largest perpendicular diameters (SPD) of all index lesions (five lesions per  
 2319 organ, up to 10 visceral lesions) is calculated. At each subsequent tumor assessment, the SPD of the index  
 2320 lesions and of new, measurable lesions (up to 5 new lesions per organ; 10 visceral lesions) are added  
 2321 together to provide the total tumor burden: Tumor Burden = SPD index lesions + SPD new, measurable  
 2322 lesions.

2323 **Table 22-1: Comparison WHO and irRECIST criteria**

|                                   | WHO                                                                                                                                                                                 | irRECIST                                                                                                                                 |
|-----------------------------------|-------------------------------------------------------------------------------------------------------------------------------------------------------------------------------------|------------------------------------------------------------------------------------------------------------------------------------------|
| <i>New, measurable lesions</i>    | Always represent PD                                                                                                                                                                 | Incorporated into tumor burden                                                                                                           |
| <i>New, nonmeasurable lesions</i> | Always represent PD                                                                                                                                                                 | Do not define progression (but preclude irCR)                                                                                            |
| <i>Non-index lesions</i>          | Changes contribute to defining BOR of CR, PR, SD, and PD                                                                                                                            | Contribute to defining irCR (complete disappearance required)                                                                            |
| <i>CR</i>                         | Disappearance of all lesions in two consecutive observations not less than 4 wk apart                                                                                               | Disappearance of all lesions in two consecutive observations not less than 4 wk apart                                                    |
| <i>PR</i>                         | ≥50% decrease in SPD of all index lesions compared with baseline in two observations at least 4 wk apart, in absence of new lesions or unequivocal progression of non-index lesions | ≥50% decrease in tumor burden compared with baseline in two observations at least 4 wk apart                                             |
| <i>SD</i>                         | 50% decrease in SPD compared with baseline cannot be established nor 25% increase compared with nadir, in absence of new lesions or unequivocal progression of non-index lesions    | 50% decrease in tumor burden compared with baseline cannot be established nor 25% increase compared with nadir                           |
| <i>PD</i>                         | At least 25% increase in SPD compared with nadir and/or unequivocal progression of non-index lesions and/or appearance of new lesions (at any single time point)                    | At least 25% increase in tumor burden compared with nadir (at any single time point) in two consecutive observations at least 4 wk apart |

2324 **Time-point response assessment using irRECIST**

2325 Percentage changes in tumor burden per assessment time point describe the size and growth kinetics of  
2326 both conventional and new, measurable lesions as they appear. At each tumor assessment, the response in  
2327 index and new, measurable lesions is defined based on the change in tumor burden (after ruling out irPD).  
2328 Decreases in tumor burden must be assessed relative to baseline measurements (i.e., the SPD of all index  
2329 lesions at screening). The irRECIST were derived from WHO criteria and, therefore, the thresholds of  
2330 response remain the same. However, the irRECIST response categories have been modified from those of  
2331 WHO criteria as detailed in [Table 22-1](#).

2332 **Overall response using the irRECIST**

2333 The sum of the products of diameters at tumor assessment using the immune-related response criteria  
2334 (irRECIST) for progressive disease incorporates the contribution of new measurable lesions. Each net  
2335 Percentage Change in Tumor Burden per assessment using irRECIST criteria accounts for the size and growth  
2336 kinetics of both old and new lesions as they appear.

2337 **Definition of Index Lesions Response Using irRECIST**

*irComplete Response (irCR):* Complete disappearance of all index lesions. This category encompasses exactly the same subjects as “CR” by the mWHO criteria.

*irPartial Response (irPR):* Decrease, relative to baseline, of 50% or greater in the sum of the products of the two largest perpendicular diameters of all index and all new measurable lesions (i.e. Percentage Change in Tumor Burden).  
Note: the appearance of new measurable lesions is factored into the overall tumor burden, but does not automatically qualify as progressive disease until the SPD increases by  $\geq 25\%$  when compared to SPD at nadir

*irStable Disease (irSD):* Does not meet criteria for irCR or irPR, in the absence of progressive disease.

*irProgressive Disease (irPD)* At least 25% increase Percentage Change in Tumor Burden (i.e., taking sum of the products of all index lesions and any new lesions) when compared to SPD at nadir

2338

2339 **Definition of Non-Index Lesions Response Using irRECIST**

*irComplete Response (irCR):* Complete disappearance of all non-index lesions. This category encompasses exactly the same subjects as “CR” by the mWHO criteria

*irPartial Response (irPR) or irStable Disease (irSD):* Non-index lesion(s) are not considered in the definition of PR, these terms do not apply

*irProgressive Disease (irPD)* Increases in number or size of non-index lesion(s) does not constitute progressive disease unless/until the Percentage Change in Tumor Burden increases by 25% (i.e., the SPD at nadir of the index lesions increases by the required amount)

2340 Impact of New Lesions on irRECIST

2341 New lesions in and by themselves do not qualify as progressive disease. However their contribution to total  
 2342 tumor burden is included in the SPD which in turn feeds into the irRECIST criteria for tumor response.  
 2343 Therefore, new non-measurable lesions will not discontinue any subject from the study.

2344 Definition of Overall Response Using irRECIST

2345 Overall response using irRECIST will be based on these criteria (Table 22-2):

*irComplete Response (irCR):* Complete disappearance of all tumor lesions (index and non-index together with no new measurable/unmeasurable lesions) for at least 4 weeks from the date of documentation of complete response

*irPartial Response (irPR):* The sum of the products of the two largest perpendicular diameters of all index lesions is measured and captured as the SPD baseline. At each subsequent tumor assessment, the sum of the products of the two largest perpendicular diameters of all index lesions and of new measurable lesions are added together to provide the Immune Response Sum of Product Diameters (irSPD). A decrease, relative to baseline of the irSPD compared to the previous SPD baseline, of 50% or greater is considered an immune Partial Response (irPR).

*irStable Disease (irSD):* irSD is defined as the failure to meet criteria for immune complete response or immune partial response, in the absence of progressive disease

*irProgressive Disease (irPD)* It is recommended in difficult cases to confirm PD by serial imaging. Any of the following will constitute progressive disease:

- At least 25% increase in the sum of the products of all index lesions over nadir SPD calculated for the index lesions.
- At least a 25% increase in the sum of the products of all index lesions and new measurable lesions (irSPD) over the baseline SPD calculated for the index lesion.

2346 **Table 22-2. Derivation of irRECIST overall responses**

| Measurable response                                 | Nonmeasurable response  |                            | Overall response |
|-----------------------------------------------------|-------------------------|----------------------------|------------------|
|                                                     | Non-index lesions       | New, nonmeasurable lesions |                  |
| Index and new, measurable lesions (tumor burden),*% |                         |                            | Using irRECIST   |
| ↓100                                                | Absent                  | Absent                     | irCR†            |
| ↓100                                                | Stable                  | Any                        | irPR†            |
| ↓100                                                | Unequivocal progression | Any                        | irPR†            |
| ↓≥50                                                | Absent/Stable           | Any                        | irPR†            |
| ↓≥50                                                | Unequivocal progression | Any                        | irPR†            |
| ↓<50 to <25↑                                        | Absent/Stable           | Any                        | irSD             |
| ↓<50 to <25↑                                        | Unequivocal progression | Any                        | irSD             |
| ≥25                                                 | Any                     | Any                        | irPD†            |

\*Decreases assessed relative to baseline (scan prior to start of any protocol therapy), including measurable lesions only  
 †Assuming response (irCR) and progression (irPD) are confirmed by a second, consecutive assessment at least 4 wk apart.

2347

2348 Immune-Related Best Overall Response Using irRECIST (irBOR)

2349 irBOR is the best confirmed irRECIST overall response over the study as a whole, recorded between the date  
2350 of first dose until the last tumor assessment before subsequent therapy (except for local palliative  
2351 radiotherapy for painful bone lesions) for the individual subject in the study. For the assessment of irBOR, all  
2352 available assessments per subject are considered.

2353 irCR or irPR determinations included in the irBOR assessment must be confirmed by a second (confirmatory)  
2354 evaluation meeting the criteria for response and performed no less than 4 weeks after the criteria for  
2355 response are first met.

2356

2357

2358

2359 **23.0 APPENDIX E-1: REGORAFENIBPATIENT DRUG DIARY INSTRUCTIONS**

|                                                                           |                                        |
|---------------------------------------------------------------------------|----------------------------------------|
| Subject ID#:                                                              | Patient Initials (F, M, L):            |
| Institution:                                                              | Cycle #: _____ Cycle start date: _____ |
| <input type="checkbox"/> Safety <input type="checkbox"/> Expansion cohort |                                        |

2360  
2361  
2362  
2363  
2364

**Remember to bring this diary, all tablet bottles, and any unused tablets to each clinic visit.  
Call your study doctor or nurse immediately if you are having any new or worsening side effects.**

**Study drug Instructions – When and How:**

2366  
2367  
2368  
2369

- Take regorafenib **once a day** with a full glass of water for 21 consecutive days, with the last 7 days off.
- Swallow tablets whole; do not chew them or crush them
- Do not skip any doses

2370

**What if I miss a scheduled dose?**

2371  
2372  
2373  
2374

- If **less than 6 hours** have passed from the scheduled time, then **take the missed dose** as soon as you remember.
- If **more than 6 hours** have passed from the scheduled time, then **skip the missed dose**. Wait for your next scheduled dose. Do not take extra medicine to make up the missed dose

2375

**What if I vomit a dose?**

2376  
2377  
2378

- If you vomit your tablets, write this down in your patient diary.
- Wait until the next scheduled dose; do not take extra medicine to make up the vomited dose.

**Additional Instructions:**

2379  
2380  
2381  
2382  
2383  
2384  
2385

- **Write down your side effects in this diary.**
- Your dose may be adjusted based on your side effects
- Keep your study drug in the original container until you take it.
- Do NOT throw away empty study drug bottles or unused tablets.
- Bring this diary, all study drug bottles, and any unused tablets to each clinic visit.

| Study Contact Information |                    |                           |
|---------------------------|--------------------|---------------------------|
| <b>Study Doctor</b>       | <b>Study Nurse</b> | <b>Backup Study Nurse</b> |
| Phone:                    | Phone:             | Phone:                    |
| Name:                     | Name:              | Name:                     |

2386



2387 **APPENDIX E-2: REGORAFENIB PATIENT DRUG DIARY**

|                                                                           |                                        |
|---------------------------------------------------------------------------|----------------------------------------|
| Subject ID#:                                                              | Patient Initials (F, M, L):            |
| Institution:                                                              | Cycle #: _____ Cycle start date: _____ |
| <input type="checkbox"/> Safety <input type="checkbox"/> Expansion cohort |                                        |

2388

2389

**Call your study doctor or nurse immediately if you are having any new or worsening side effects. Your study doctor or nurse will tell you what to do.**

2390

2391

*Write your side effects in this diary. Your dose may be adjusted based on your side effects.*

2392

| Week 1    |          |      |              | # of tablets to take once daily:         | Comments                                                                       |
|-----------|----------|------|--------------|------------------------------------------|--------------------------------------------------------------------------------|
| Cycle Day | Week Day | Date | Time         | # of tablets taken<br>(Write down below) | Write down missed/ vomited doses, side-effects<br>(e.g. nausea, vomiting etc.) |
| 1         |          |      | ____:____ AM |                                          |                                                                                |
|           |          |      | ____:____ PM |                                          |                                                                                |
| 2         |          |      | ____:____ AM |                                          |                                                                                |
|           |          |      | ____:____ PM |                                          |                                                                                |
| 3         |          |      | ____:____ AM |                                          |                                                                                |
|           |          |      | ____:____ PM |                                          |                                                                                |
| 4         |          |      | ____:____ AM |                                          |                                                                                |
|           |          |      | ____:____ PM |                                          |                                                                                |
| 5         |          |      | ____:____ AM |                                          |                                                                                |
|           |          |      | ____:____ PM |                                          |                                                                                |
| 6         |          |      | ____:____ AM |                                          |                                                                                |
|           |          |      | ____:____ PM |                                          |                                                                                |
| 7         |          |      | ____:____ AM |                                          |                                                                                |
|           |          |      | ____:____ PM |                                          |                                                                                |

2393

|                                                                           |                |
|---------------------------------------------------------------------------|----------------|
| Participant/ Caregiver Signature (please sign when submitting your diary) | Date:          |
| _____                                                                     | ____/____/____ |

2394

|                                                                           |                                        |
|---------------------------------------------------------------------------|----------------------------------------|
| Subject ID#:                                                              | Patient Initials (F, M, L):            |
| Institution:                                                              | Cycle #: _____ Cycle start date: _____ |
| <input type="checkbox"/> Safety <input type="checkbox"/> Expansion cohort |                                        |

2395

2396

2397

2398

2399

**Call your study doctor or nurse immediately if you are having any new or worsening side effects. Your study doctor or nurse will tell you what to do.**

*Write your side effects in this diary. Your dose may be adjusted based on your side effects.*

| Week 2    |          |      |            |                                                 |                                                                                                |
|-----------|----------|------|------------|-------------------------------------------------|------------------------------------------------------------------------------------------------|
| Cycle Day | Week Day | Date | Time       | # of tablets to take once daily:                | Comments<br><i>Write down missed/ vomited doses, side-effects (e.g. nausea, vomiting etc.)</i> |
|           |          |      |            | # of tablets taken<br><i>(Write down below)</i> |                                                                                                |
| 8         |          |      | __ : __ AM |                                                 |                                                                                                |
|           |          |      | __ : __ PM |                                                 |                                                                                                |
| 9         |          |      | __ : __ AM |                                                 |                                                                                                |
|           |          |      | __ : __ PM |                                                 |                                                                                                |
| 10        |          |      | __ : __ AM |                                                 |                                                                                                |
|           |          |      | __ : __ PM |                                                 |                                                                                                |
| 11        |          |      | __ : __ AM |                                                 |                                                                                                |
|           |          |      | __ : __ PM |                                                 |                                                                                                |
| 12        |          |      | __ : __ AM |                                                 |                                                                                                |
|           |          |      | __ : __ PM |                                                 |                                                                                                |
| 13        |          |      | __ : __ AM |                                                 |                                                                                                |
|           |          |      | __ : __ PM |                                                 |                                                                                                |
| 14        |          |      | __ : __ AM |                                                 |                                                                                                |
|           |          |      | __ : __ PM |                                                 |                                                                                                |

2400

|                                                                                  |              |
|----------------------------------------------------------------------------------|--------------|
| Participant/ Caregiver Signature <i>(please sign when submitting your diary)</i> | Date:        |
| _____                                                                            | __ / __ / __ |

2401

|                                                                           |                                        |
|---------------------------------------------------------------------------|----------------------------------------|
| Subject ID#:                                                              | Patient Initials (F, M, L):            |
| Institution:                                                              | Cycle #: _____ Cycle start date: _____ |
| <input type="checkbox"/> Safety <input type="checkbox"/> Expansion cohort |                                        |

2402

2403

**Call your study doctor or nurse immediately if you are having any new or worsening side effects. Your study doctor or nurse will tell you what to do.**

2404

2405

*Write your side effects in this diary. Your dose may be adjusted based on your side effects.*

2406

| Week 3    |          |      |            |                                                 |                                                                                                |
|-----------|----------|------|------------|-------------------------------------------------|------------------------------------------------------------------------------------------------|
| Cycle Day | Week Day | Date | Time       | # of tablets to take once daily:                | Comments<br><i>Write down missed/ vomited doses, side-effects (e.g. nausea, vomiting etc.)</i> |
|           |          |      |            | # of tablets taken<br><i>(Write down below)</i> |                                                                                                |
| 15        |          |      | __ : __ AM |                                                 |                                                                                                |
|           |          |      | __ : __ PM |                                                 |                                                                                                |
| 16        |          |      | __ : __ AM |                                                 |                                                                                                |
|           |          |      | __ : __ PM |                                                 |                                                                                                |
| 17        |          |      | __ : __ AM |                                                 |                                                                                                |
|           |          |      | __ : __ PM |                                                 |                                                                                                |
| 18        |          |      | __ : __ AM |                                                 |                                                                                                |
|           |          |      | __ : __ PM |                                                 |                                                                                                |
| 19        |          |      | __ : __ AM |                                                 |                                                                                                |
|           |          |      | __ : __ PM |                                                 |                                                                                                |
| 20        |          |      | __ : __ AM |                                                 |                                                                                                |
|           |          |      | __ : __ PM |                                                 |                                                                                                |
| 21        |          |      | __ : __ AM |                                                 |                                                                                                |
|           |          |      | __ : __ PM |                                                 |                                                                                                |

2407

|                                                                                  |              |
|----------------------------------------------------------------------------------|--------------|
| Participant/ Caregiver Signature <i>(please sign when submitting your diary)</i> | Date:        |
| _____                                                                            | __ / __ / __ |

2408

**Study Team ONLY:** # of Study Drug Bottles Returned: \_\_\_\_\_ # of tablets returned: \_\_\_\_\_

*Compare with drug diary entries made by participant/guardian. If there is a discrepancy (in the # of bottles or the # of tablets returned, please reconcile (initials & date):* \_\_\_\_\_

2409

2410

2411

2412 **24.0 APPENDIX F: CYP3A4 INHIBITORS AND INDUCERS**

2413 • **CYP3A4 inducers and inhibitors**

2414 Table 10–6 presents an overview of CYP3A4 inducers and **strong** CYP3A4 inhibitors. CYP3A4  
 2415 inducers and **strong** CYP3A4 inhibitors are NOT allowed due to drug-drug- interaction with  
 2416 regorafenib.

2417 **Table 10–6: An overview of CYP3A4 inducers and strong CYP3A4 inhibitors**

| 2418 | <b>STRONG CYP3A4 Inhibitors</b>                                 |      | <b>CYP3A4 Inducers</b>          |
|------|-----------------------------------------------------------------|------|---------------------------------|
| 2419 | Boceprevir                                                      | 2448 | Avasimibe                       |
| 2420 | Clarithromycin                                                  | 2449 | Bosentan                        |
| 2421 | Cobicistat, only available in the combination with elvitegravir | 2450 | Carbamazepine                   |
| 2422 | emtricitabine, tenofovir or disoproxil fumarate                 | 2451 | Efavirenz                       |
| 2423 | Conivaptan                                                      | 2452 | Enzalutamide                    |
| 2424 | Delavirdine                                                     | 2453 | Etravirine                      |
| 2425 | Idelalisib                                                      | 2454 | Fosphenytoin                    |
| 2426 | Indinavir                                                       | 2455 | Hypericum perforatum (St John’s |
| 2427 | Itraconazole                                                    | 2456 | Wort)                           |
| 2428 | Ketoconazole                                                    | 2457 | Lersivirine                     |
| 2429 | Lopinavir                                                       | 2458 | Lumacaftor                      |
| 2430 | Mibefradil                                                      | 2459 | Methylphenobarbital             |
| 2431 | Miconazole                                                      | 2460 | Mitotane                        |
| 2432 | Nefazodone                                                      | 2461 | Modafinil                       |
| 2433 | Nelfinavir                                                      | 2462 | Nafcillin                       |
| 2434 | Posaconazole                                                    | 2463 | Phenobarbital                   |
| 2435 | Ritonavir                                                       | 2464 | Phenytoin                       |
| 2436 | Saquinavir                                                      | 2465 | Primidone                       |
| 2437 | Telaprevir                                                      | 2466 | Rifabutin                       |
| 2438 | Telithromycin                                                   | 2467 | Rifampicin                      |
| 2439 | Tipranavir                                                      | 2468 | Rifamycin                       |
| 2440 | Troleandomycin                                                  | 2469 | Semagacestat                    |
| 2441 | Voriconazole                                                    | 2470 | Thioridazine                    |

2442 A STRONG inhibitor is **NOT allowed during this clinical trial**. CYP3A4  
 2443 inducers are **NOT allowed during this clinical trial**.

2444  
 2445  
 2446  
 2447

2471 **25.0 APPENDIX G: NEW YORK HEART ASSOCIATION CLASSIFICATION OF HEART FAILURE**

---

2472 Modified from Dolgin et al., 1994 [31]

| <b>NYHA Classification of Heart Failure</b> |                                                                                                                                                                                                                               |
|---------------------------------------------|-------------------------------------------------------------------------------------------------------------------------------------------------------------------------------------------------------------------------------|
| <b>Class 1</b>                              | No symptoms. Ordinary physical activity such as walking and climbing stairs does not cause fatigue or dyspnea.                                                                                                                |
| <b>Class 2</b>                              | Symptoms with ordinary physical activity. Walking or climbing stairs rapidly, walking uphill, walking or stair climbing after meals, in cold weather, in wind or when under emotional stress causes undue fatigue or dyspnea. |
| <b>Class 3</b>                              | Symptoms with less than ordinary physical activity. Walking one to two blocks on the level and climbing more than one flight of stairs in normal conditions causes undue fatigue or dyspnea.                                  |
| <b>Class 4</b>                              | Symptoms at rest. Inability to carry on any physical activity without fatigue or dyspnea.                                                                                                                                     |

2473

2474

2475

2476

2477

2478

2479

2480

2481

2482

2483

2484

2485

2486

2487

2488

2489

2490

2491

2492

2493

2494

2495

2496 **26.0 APPENDIX H: MANAGEMENT ALGORITHMS**

---

2497 These general guidelines constitute guidance to the Investigator and may be supplemented by discussions with the Medical  
2498 Monitor representing the Sponsor. The guidance applies to all immuno-oncology agents and regimens.

2499  
2500 A general principle is that differential diagnoses should be diligently evaluated according to standard medical practice. Non-  
2501 inflammatory etiologies should be considered and appropriately treated.

2502  
2503 Corticosteroids are a primary therapy for immuno-oncology drug-related adverse events. The oral equivalent of the recommended IV  
2504 doses may be considered for ambulatory patients with low-grade toxicity. The lower bioavailability of oral corticosteroids should be  
2505 taken into account when switching to the equivalent dose of oral corticosteroids.

2506  
2507 Consultation with a medical or surgical specialist, especially prior to an invasive diagnostic or therapeutic procedure, is recommended.

2508  
2509 The frequency and severity of the related adverse events covered by these algorithms will depend on the immuno-oncology agent or  
2510 regimen being used.

2511  
2512

2513 **GI Adverse Event Management Algorithm**

2514 Rule out non-inflammatory causes. If non-inflammatory cause is identified, treat accordingly and continue I-O therapy.  
 2515 Opiates/narcotics may mask symptoms of perforation. Infliximab should not be used in cases of perforation or sepsis.

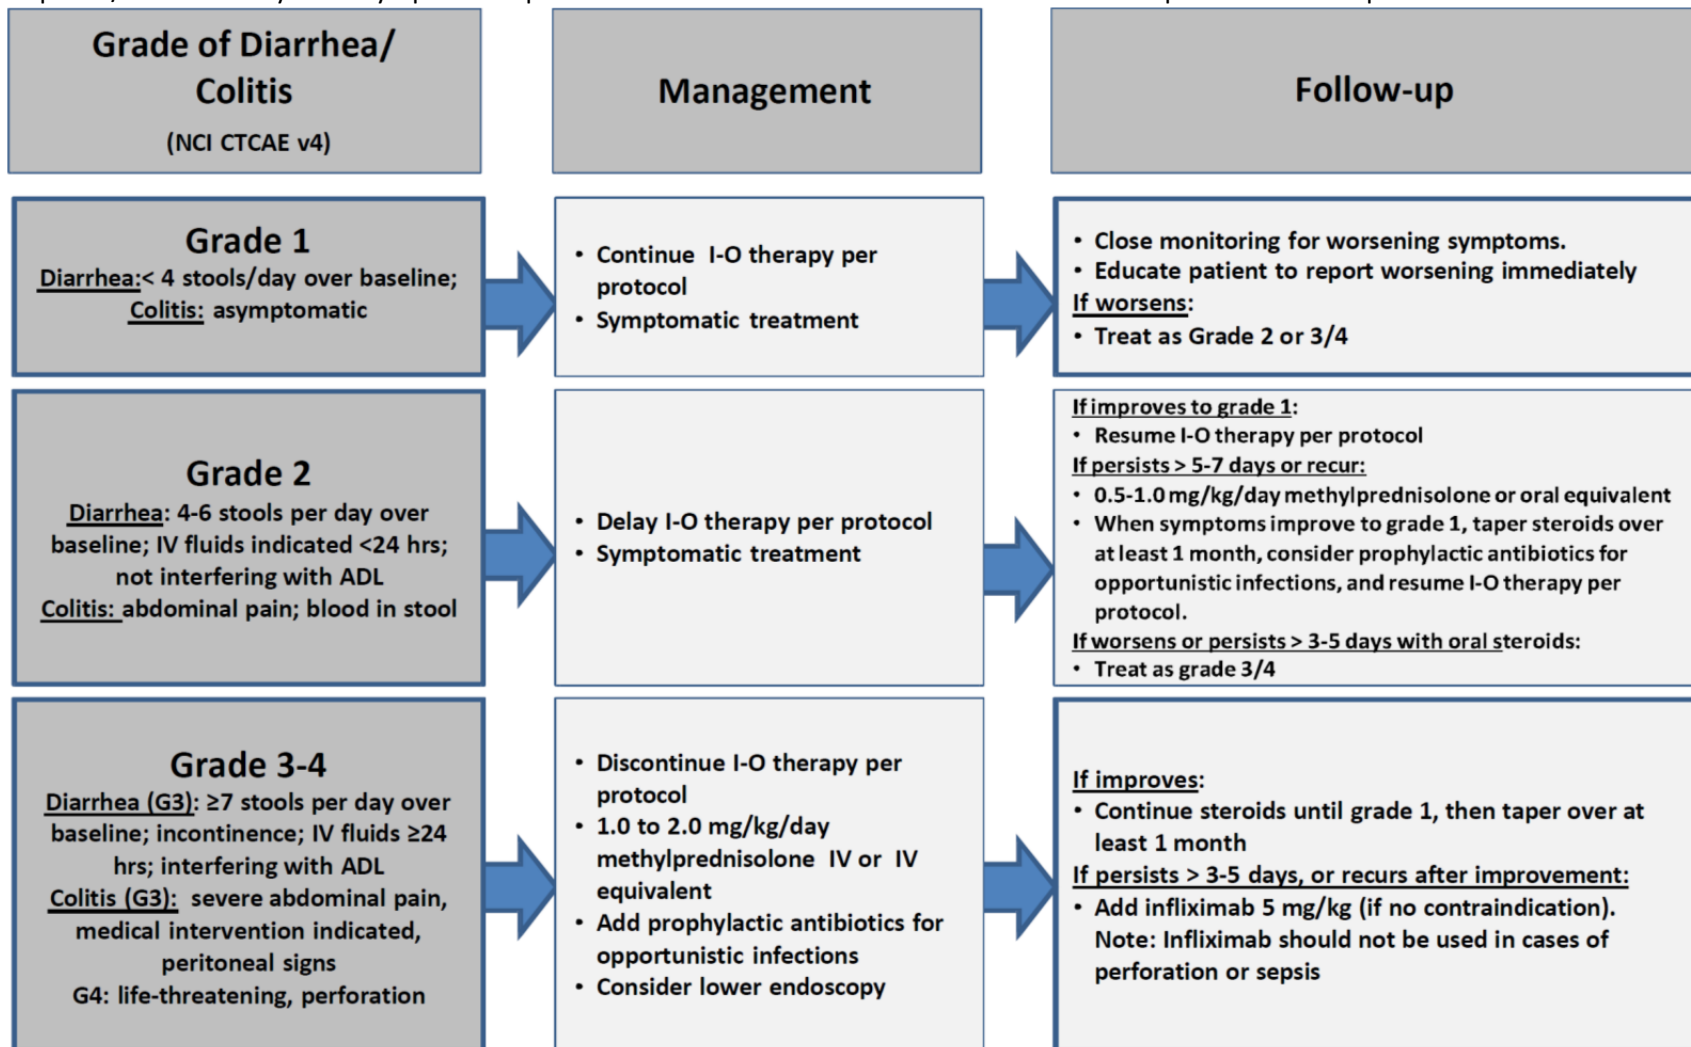

2516 Patients on IV steroids may be switched to an equivalent dose of oral corticosteroids (e.g. prednisone) at start of tapering or earlier, once sustained clinical improvement is observed. Lower bioavailability of  
 2517 oral corticosteroids should be taken into account when switching to the equivalent dose of oral corticosteroids.  
 2518

2510  
2521

2522

# Renal Adverse Event Management Algorithm

2523

Rule out non-inflammatory causes. If non-inflammatory cause, treat accordingly and continue I-O therapy.

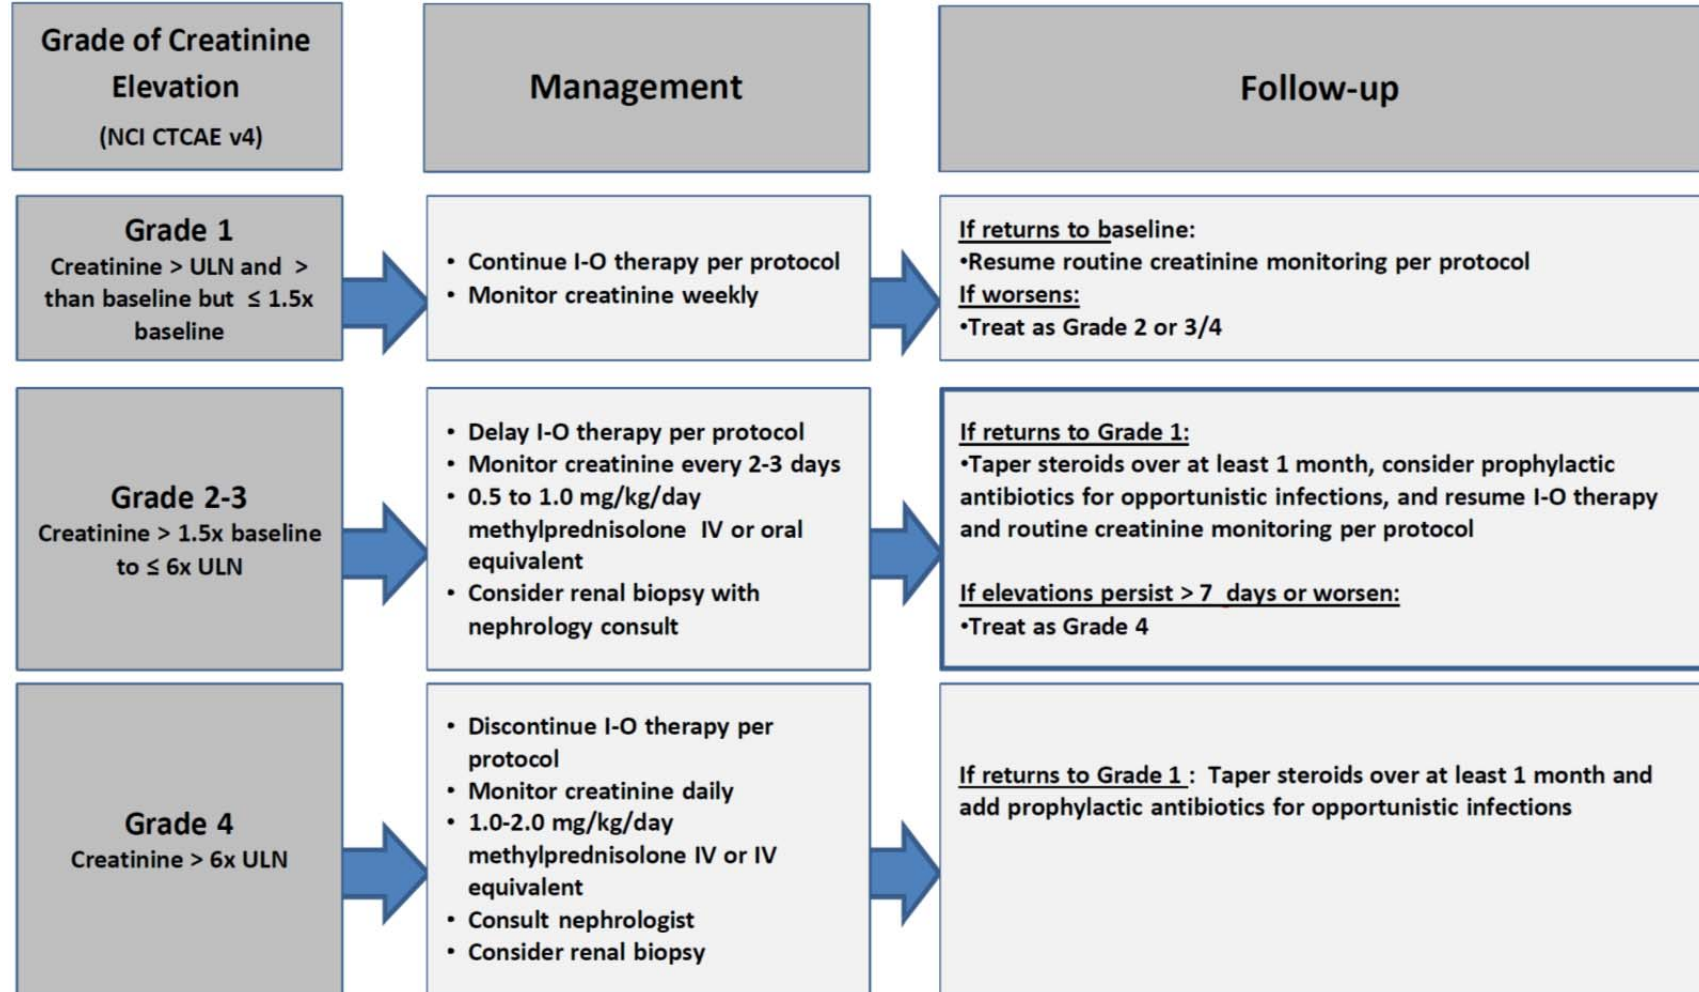

2524  
2525  
2526  
2527

2528

2529

Patients on IV steroids may be switched to an equivalent dose of oral corticosteroids (e.g. prednisone) at start of tapering or earlier, once sustained clinical improvement is observed. Lower bioavailability of oral corticosteroids should be taken into account when switching to the equivalent dose of oral corticosteroids.



2530  
2532

## Pulmonary Adverse Event Management Algorithm

2533

2534

2535  
2536

Rule out non-inflammatory causes. If non-inflammatory cause, treat accordingly and continue I-O therapy. Evaluate with imaging and pulmonary consultation.

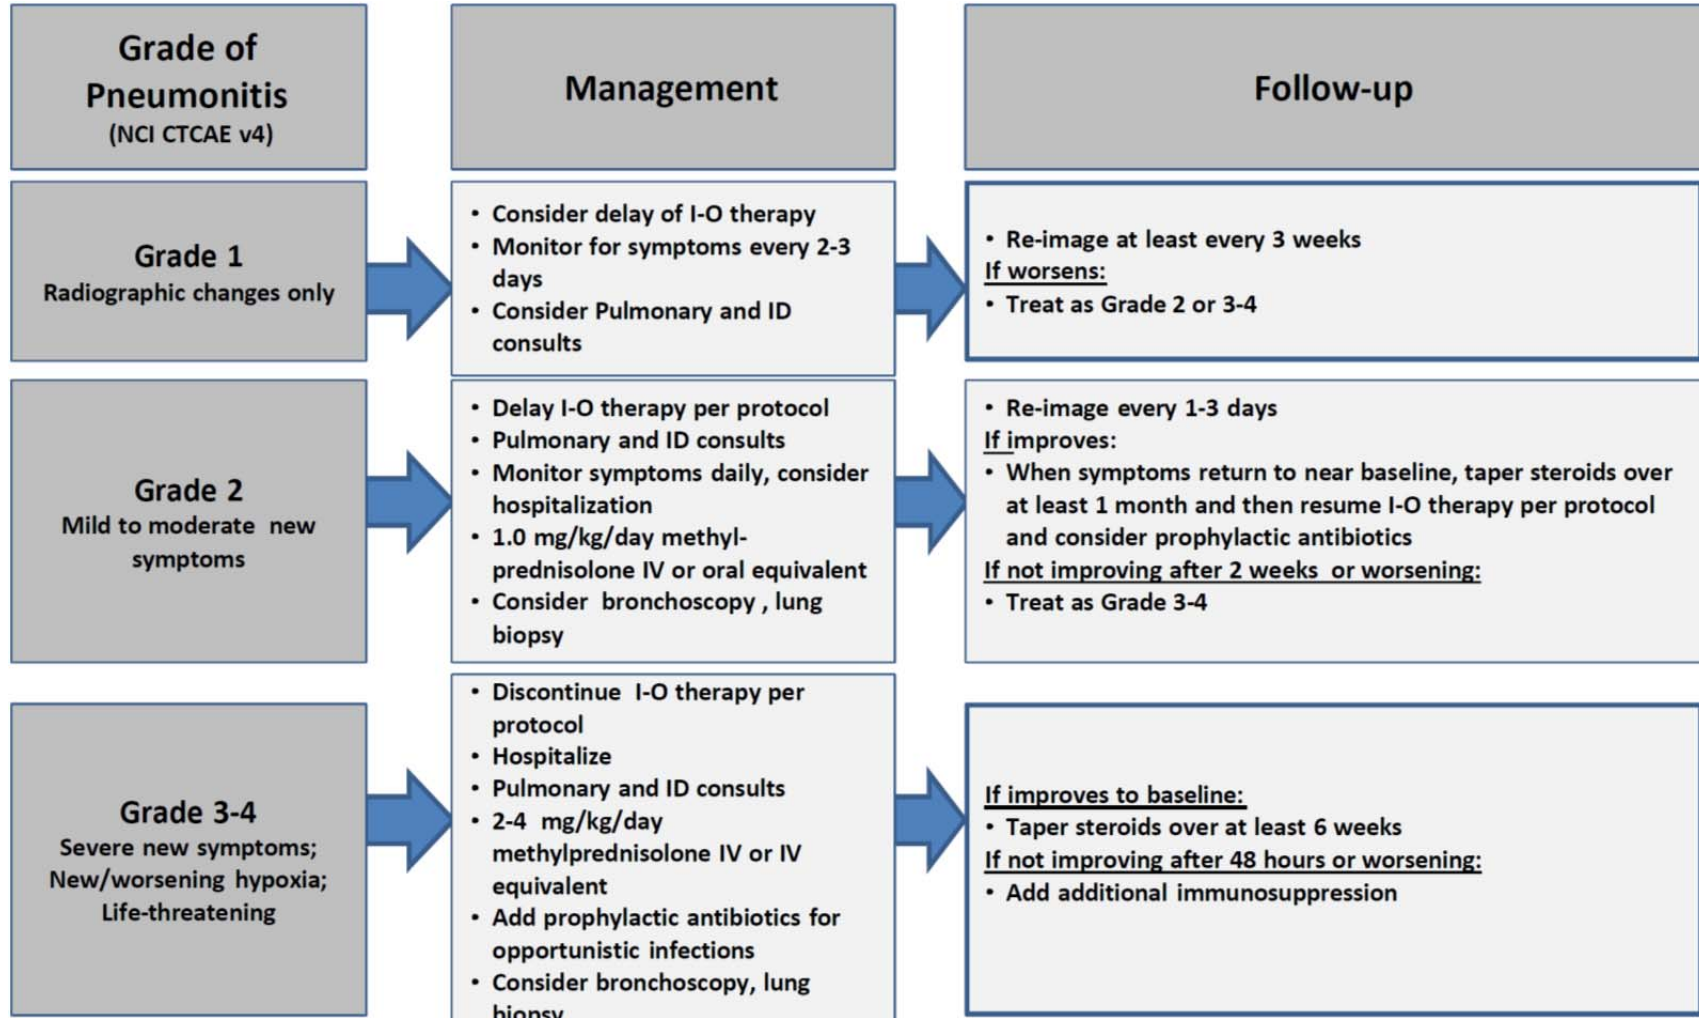

2537

2539

2540

2541

Patients on IV steroids may be switched to an equivalent dose of oral corticosteroids (e.g. prednisone) at start of tapering or earlier, once sustained clinical improvement is observed. Lower bioavailability of oral corticosteroids should be taken into account when switching to the equivalent dose of oral corticosteroids

2542  
2544

## Hepatic Adverse Event Management Algorithm

2545

2546

Rule out non-inflammatory causes. If non-inflammatory cause, treat accordingly and continue I-O therapy. Consider imaging for obstruction.

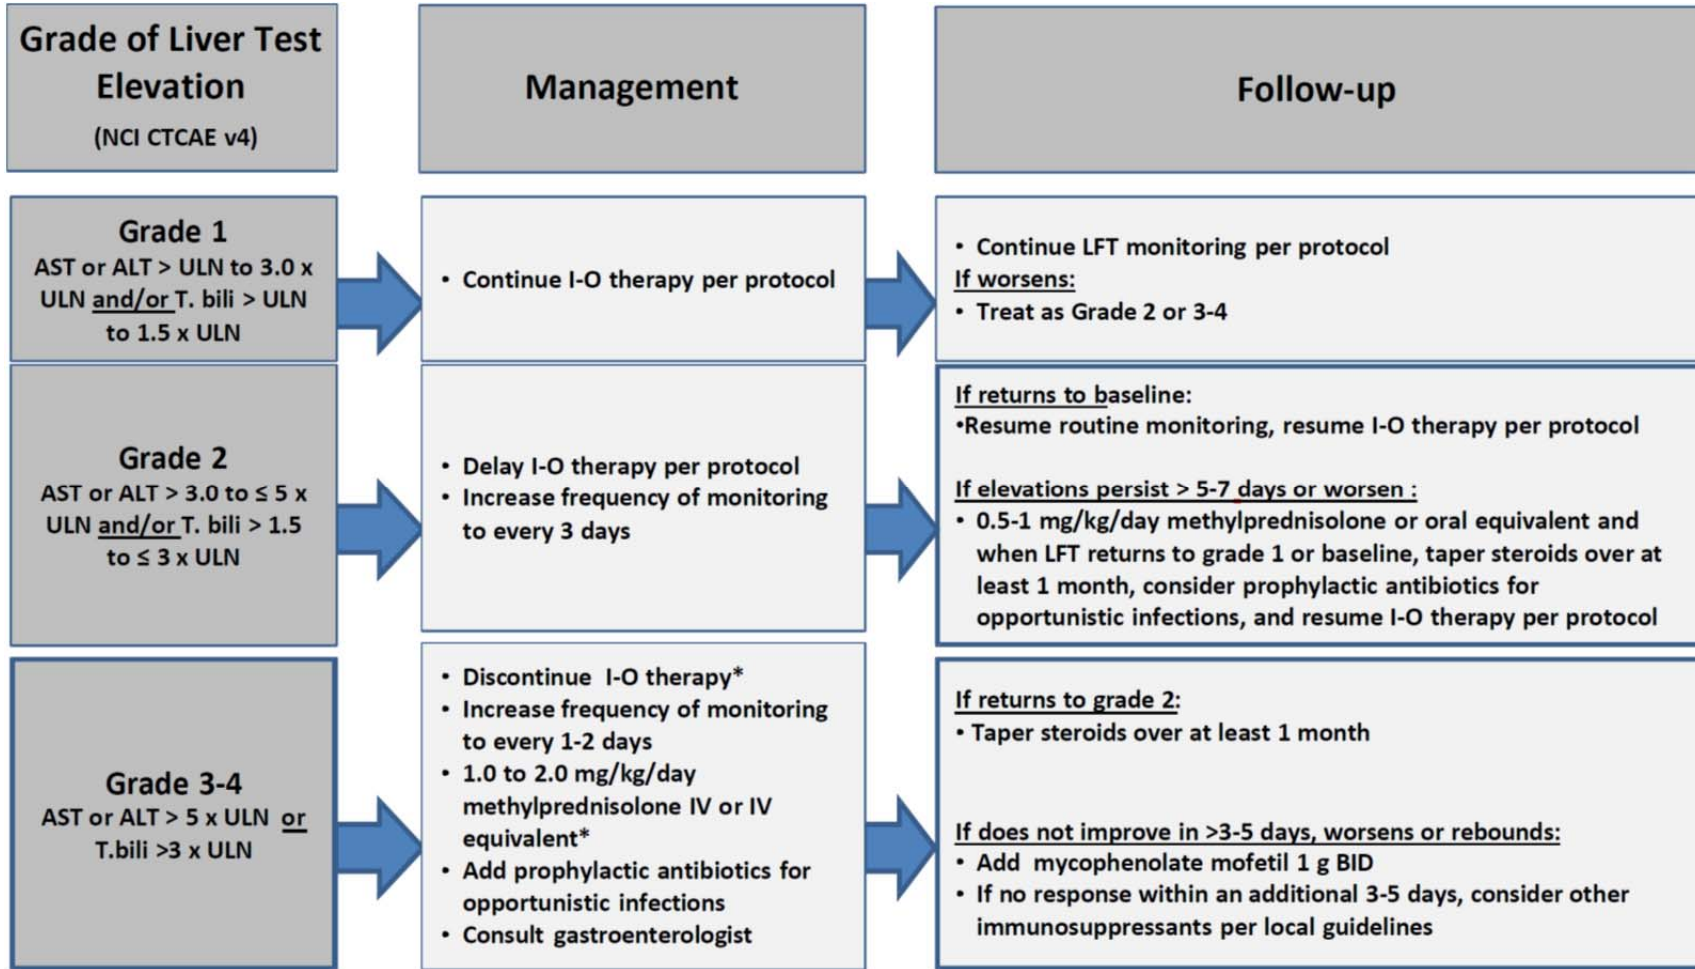

2547  
2548  
2549

2550

2551

Patients on IV steroids may be switched to an equivalent dose of oral corticosteroids (e.g. prednisone) at start of tapering or earlier, once sustained clinical improvement is observed. Lower bioavailability of oral corticosteroids should be taken into account when switching to the equivalent dose of oral corticosteroids.

2552

\*The recommended starting dose for grade 4 hepatitis is 2 mg/kg/day methylprednisolone IV.

2554  
2555

2556

## Endocrinopathy Adverse Event Management Algorithm

2557

Rule out non-inflammatory causes. If non-inflammatory cause, treat accordingly and continue I-O therapy. Consider visual field testing, endocrinology consultation, and imaging.

2558

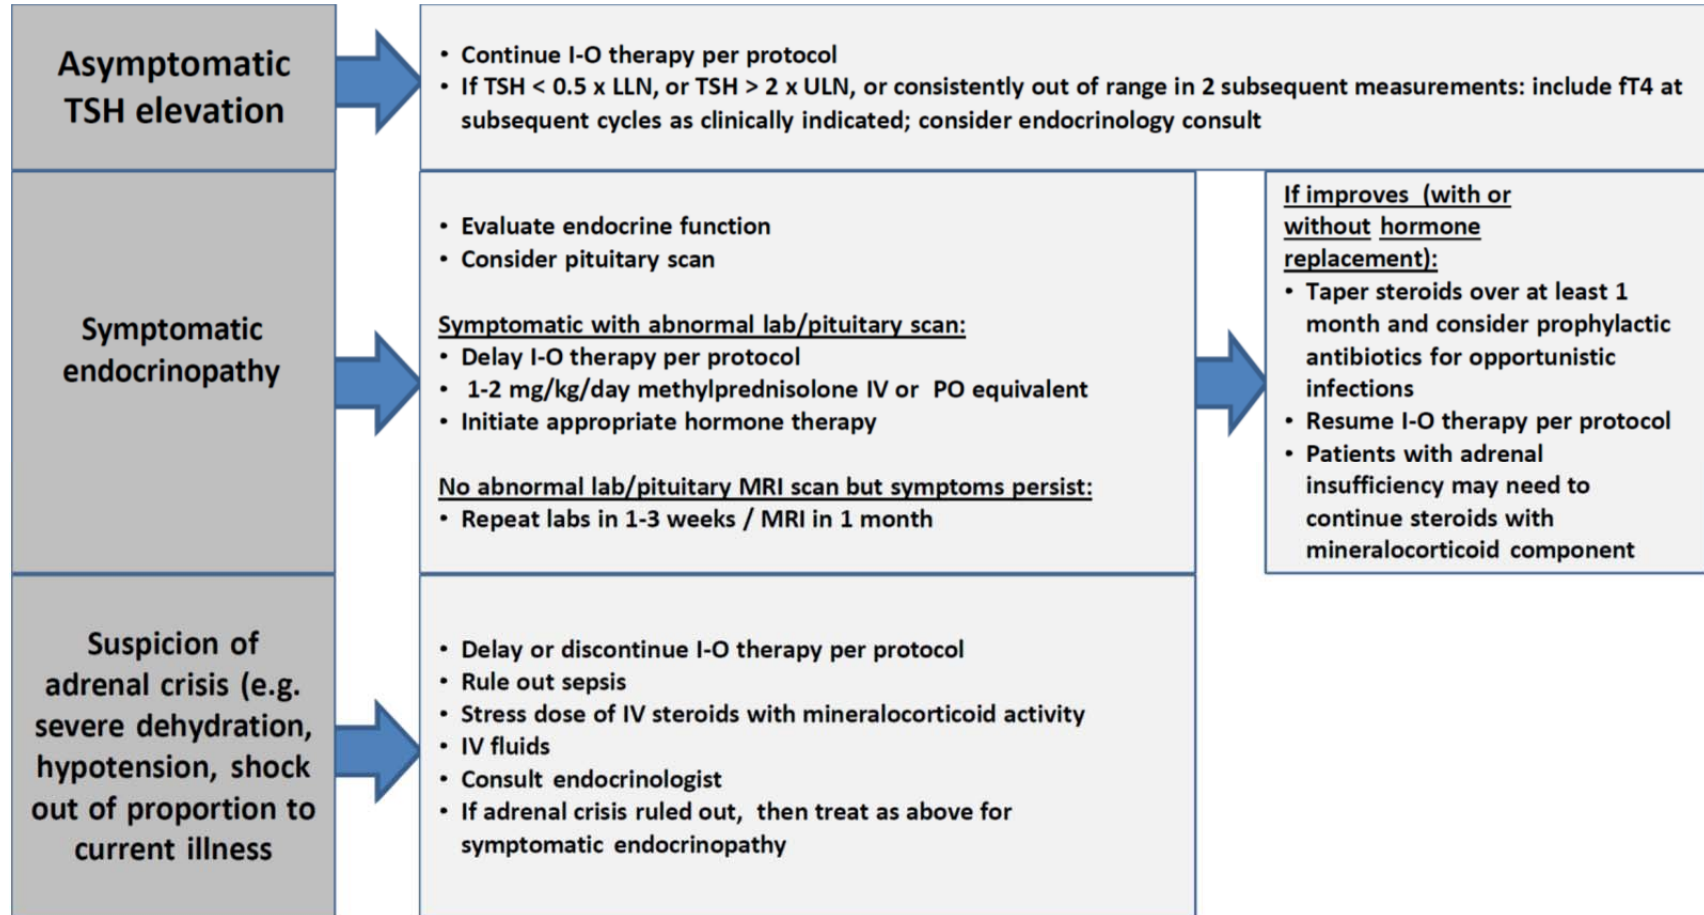

2559

2560

Patients on IV steroids may be switched to an equivalent dose of oral corticosteroids (e.g. prednisone) at start of tapering or earlier, once sustained clinical improvement is observed. Lower bioavailability of oral corticosteroids should be taken into account when switching to the equivalent dose of oral corticosteroids.

2561

2562

2563

2564

2565

# Skin Adverse Event Management Algorithm

Rule out non-inflammatory causes. If non-inflammatory cause, treat accordingly and continue I-O therapy.

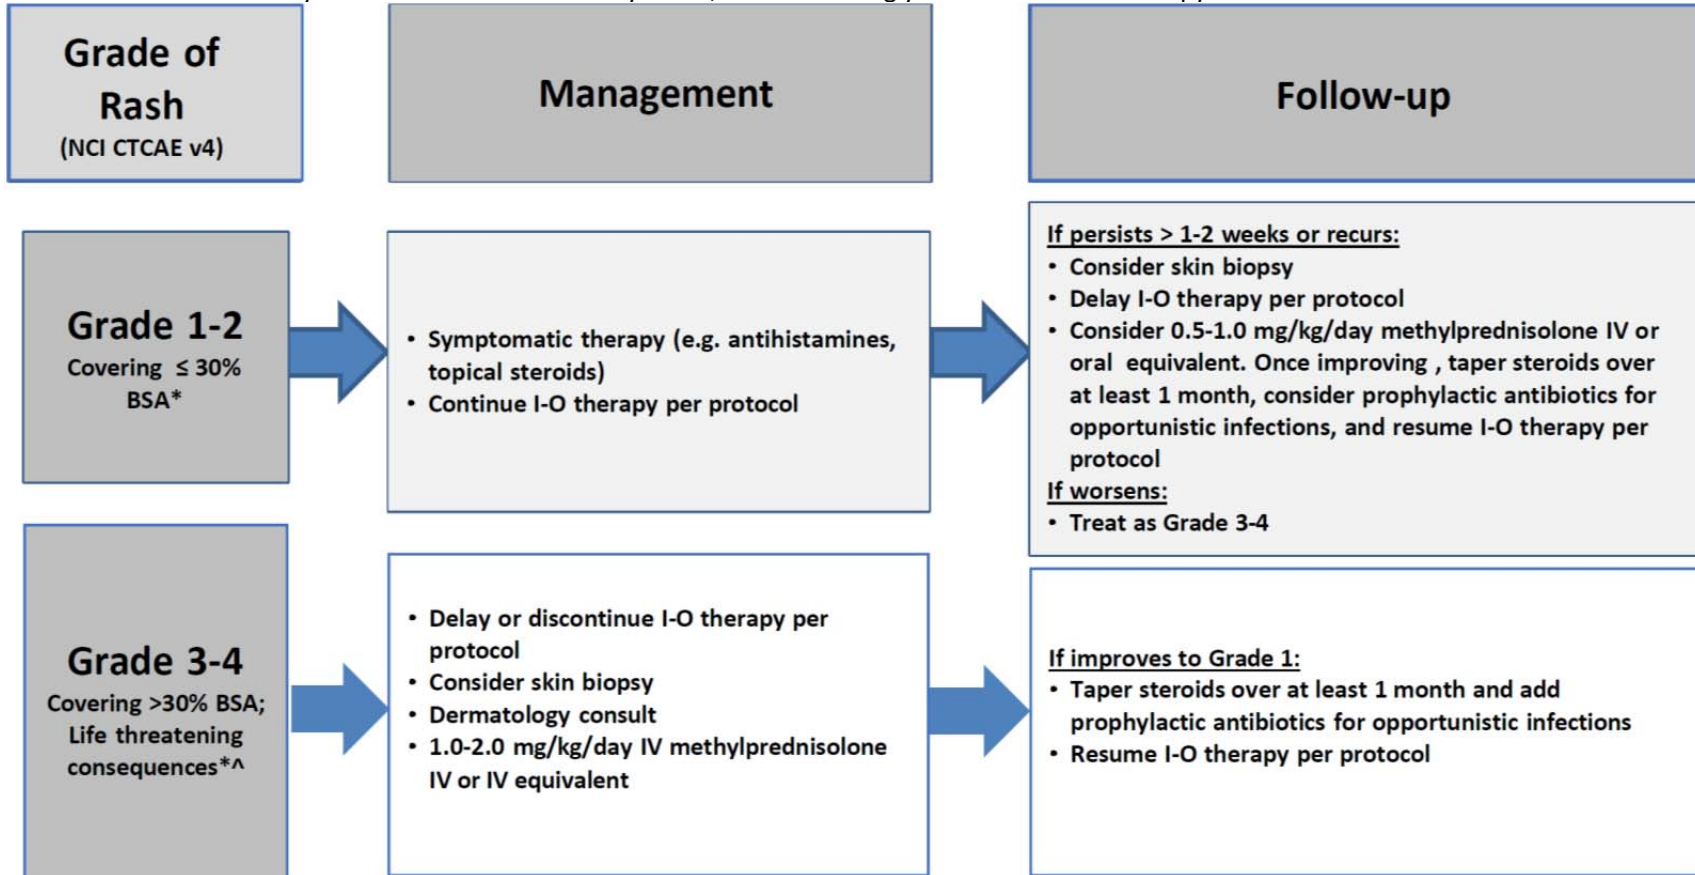

2566

2567

2568

2569

2570

Patients on IV steroids may be switched to an equivalent dose of oral corticosteroids (e.g. prednisone) at start of tapering or earlier, once sustained clinical improvement is observed. Lower bioavailability of oral corticosteroids should be taken into account when switching to the equivalent dose of oral corticosteroids.

2571

\*Refer to NCI CTCAE v5 for term-specific grading criteria.

2572

2573

^If SJS/TEN is suspected, withhold I-O therapy and refer patient for specialized care for assessment and treatment. If SJS or TEN is diagnosed, permanently discontinue I-O therapy.

2574  
2576

2577

# Neurological Adverse Event Management Algorithm

2578

Rule out non-inflammatory causes. If non-inflammatory cause, treat accordingly and continue I-O therapy.

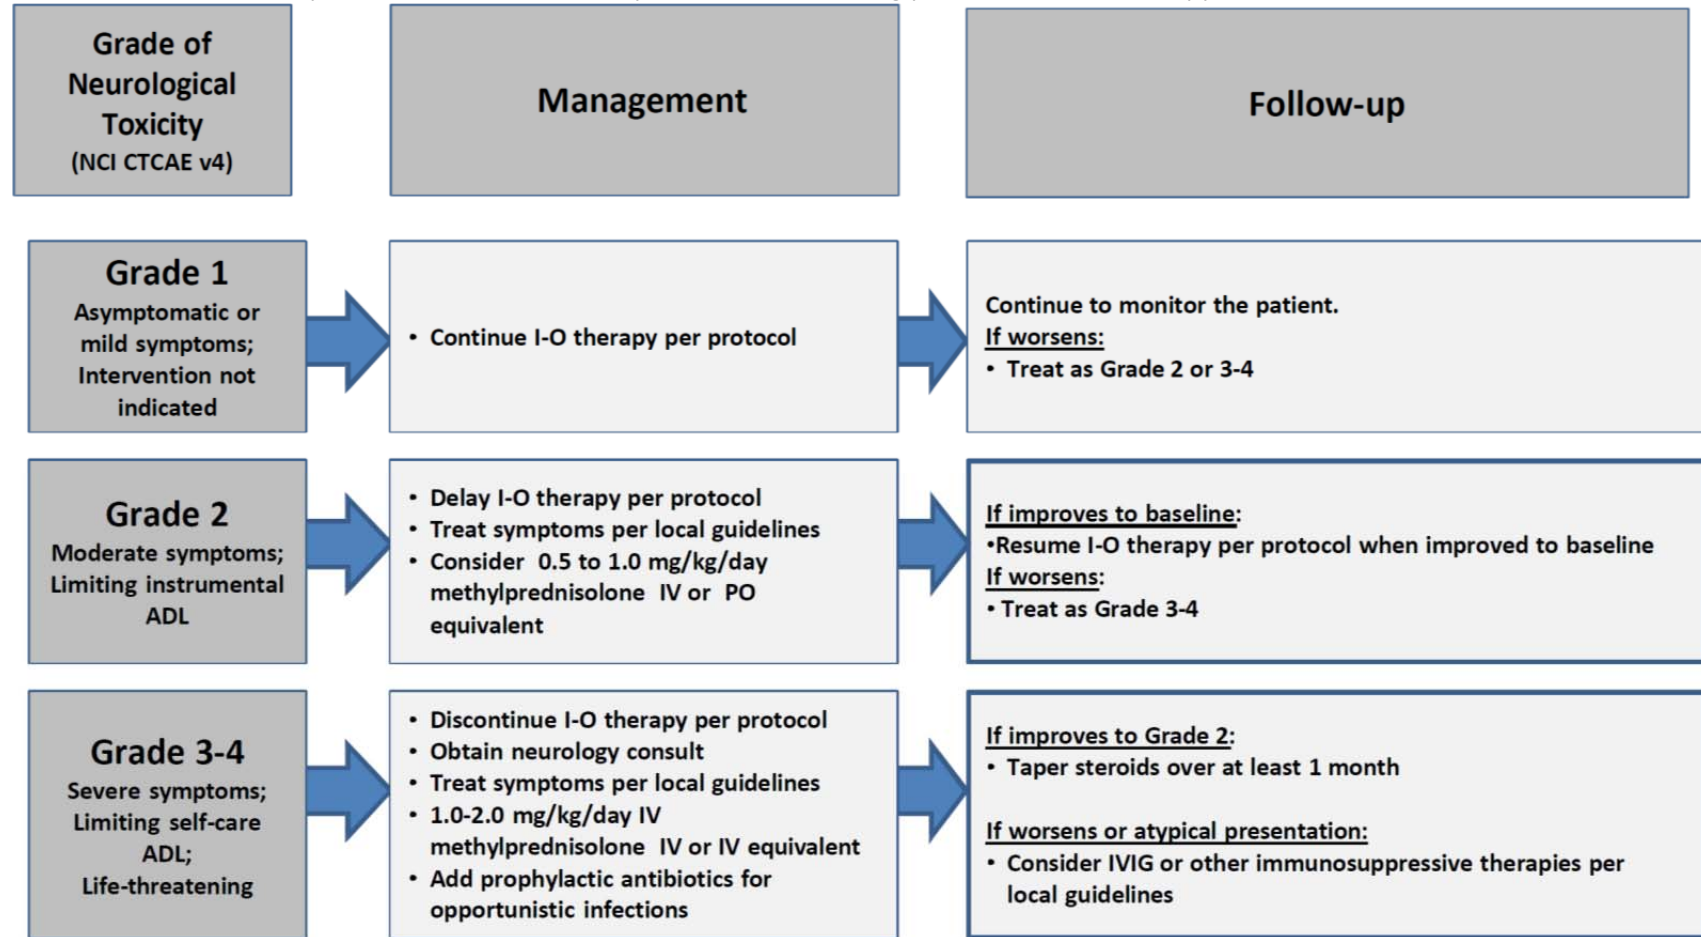

2579  
2580  
2581  
2582

2583

2584

2585

Patients on IV steroids may be switched to an equivalent dose of oral corticosteroids (e.g. prednisone) at start of tapering or earlier, once sustained clinical improvement is observed. Lower bioavailability of oral corticosteroids should be taken into account when switching to the equivalent dose of oral corticosteroids

# Myocarditis Adverse Event Management Algorithm

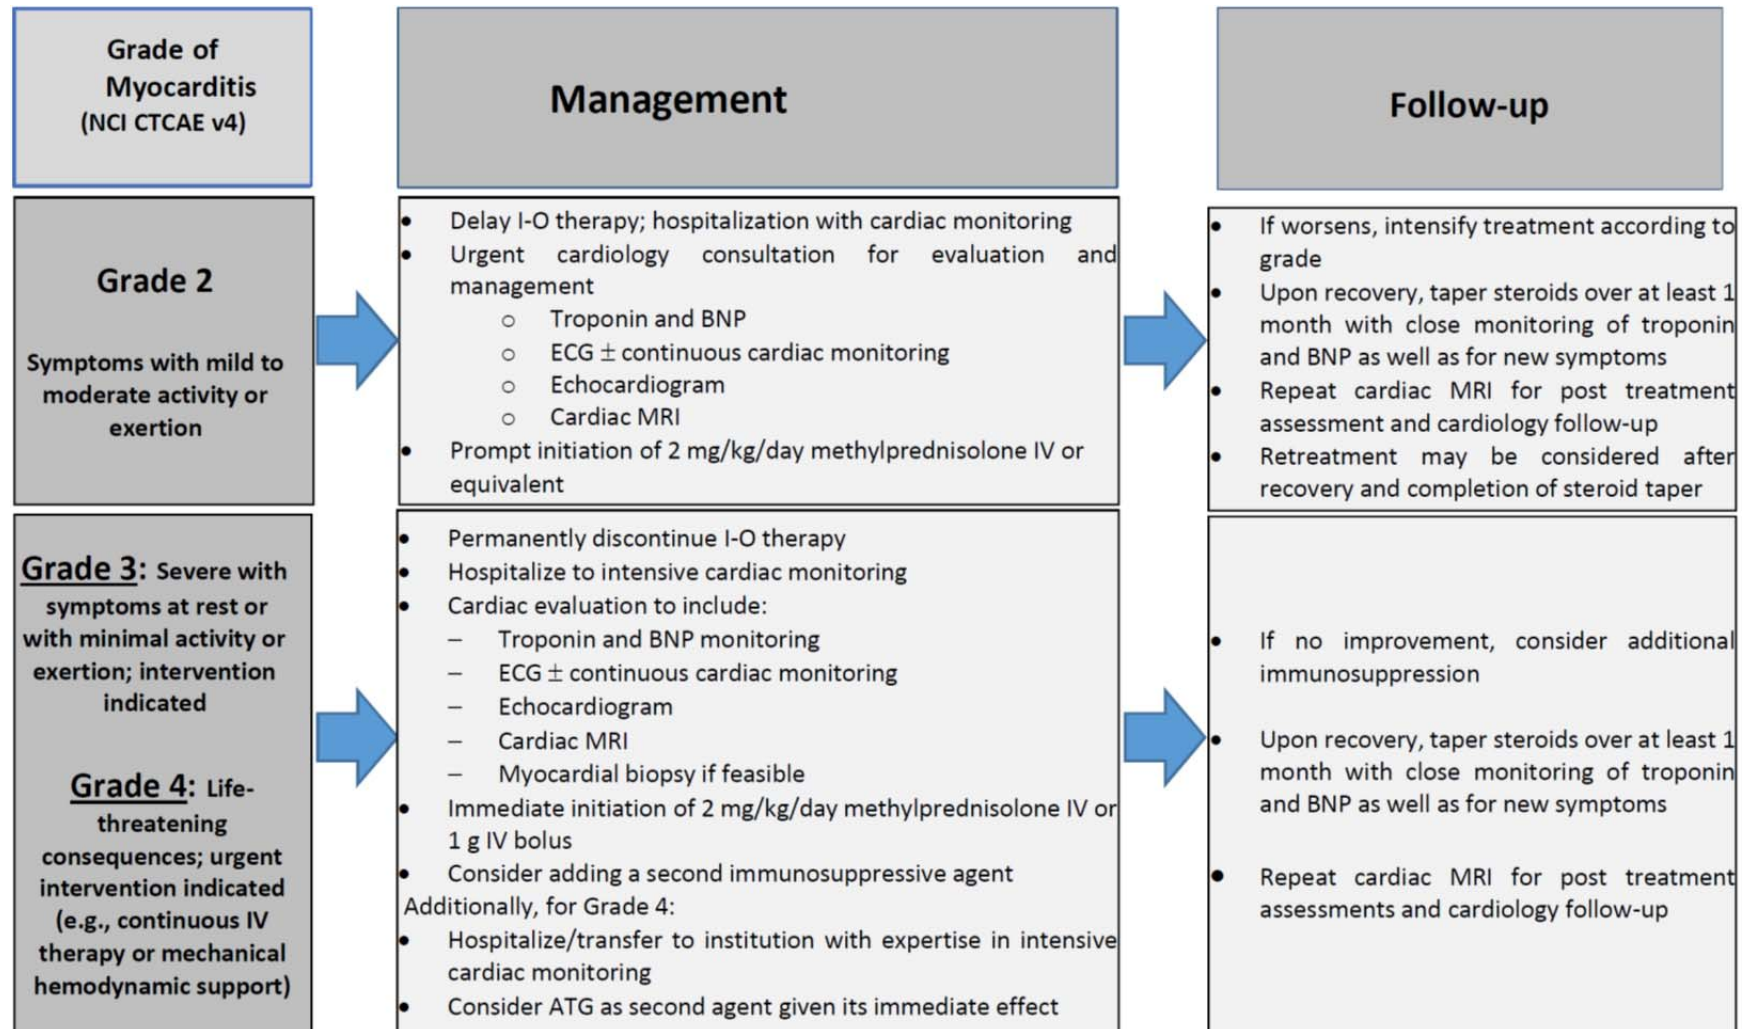

Patients on IV steroids may be switched to an equivalent dose of oral corticosteroids (eg, prednisone) at start of tapering or earlier, once sustained clinical improvement is observed. Lower bioavailability of oral corticosteroids should be taken into account when switching to the equivalent dose of oral corticosteroids.

Prophylactic antibiotics should be considered in the setting of ongoing immunosuppression. ATG = anti-thymocyte globulin; BNP = B-type natriuretic peptide; ECG = electrocardiogram; IV = intravenous; MRI = magnetic resonance imaging
