# Supplementary material
Source: PubMed Central journal article supplement (PMC9999273)
Supplement: jamaoncol-e227845-s003.pdf [file jamaoncol-e227845-s003.pdf]

## Data Sharing Statement

Fakih. Regorafenib, Ipilimumab, and Nivolumab for Patients With Microsatellite Stable Colorectal Cancer and Disease Progression With Prior Chemotherapy. *JAMA Oncol.* Published March 09, 2023. doi:10.1001/jamaoncol.2022.7845

### Data

**Data available:** Yes

**Data types:** Deidentified participant data

**How to access data:** [mfakih@coh.org](mailto:mfakih@coh.org)

**When available:** With publication

### Supporting Documents

**Document types:** None

### Additional Information

**Who can access the data:** researchers whose proposed use of the data has been approved

**Types of analyses:** for research only

**Mechanisms of data availability:** with investigator support
